# Supplementary material for: A copper-catalyzed arylation/nucleophilic addition/fragmentation/C–S bond formation cascade: synthesis of bis(arylthio)imines
Source: Royal Society of Chemistry journal article supplement (doi:10.1039/c6qo00739b), 2017-01-01
Supplement: c6qo00739b1.pdf [file c6qo00739b1.pdf]

## Supporting Information

### Copper-catalyzed arylation/nucleophilic addition/fragmentation/ C–S bond formation cascade: synthesis of bis(arythio)imines

Wei-Si Guo, Yuan-Chao Wang, Qian Dou, Li-Rong Wen\* and Ming Li\*

*State Key Laboratory Base of Eco-Chemical Engineering, College of Chemistry and Molecular Engineering, Qingdao University of Science and Technology, Qingdao 266042, China.*

*wenlirong@qust.edu.cn, liming928@qust.edu.cn*

| Table of Contents                                                        | Page No |
|--------------------------------------------------------------------------|---------|
| Table of Content (TOC)                                                   | S1      |
| General methods                                                          | S2      |
| Optimization of the reaction conditions                                  | S2      |
| General procedure for the synthesis of compounds <b>3</b>                | S4      |
| Variable-temperature NMR experiments                                     | S6      |
| Procedure for the synthesis of compound <b>4</b>                         | S14     |
| Scale-up reaction and synthetic transformation                           | S14     |
| References                                                               | S17     |
| <sup>1</sup> H NMR and <sup>13</sup> C NMR spectra of compounds <b>3</b> | S18     |
| <sup>1</sup> H NMR and <sup>13</sup> C NMR spectra of compounds <b>4</b> | S66     |
| <sup>1</sup> H NMR and <sup>13</sup> C NMR spectra of <b>6, 7, 8, 9</b>  | S68     |
| Molecular structure and crystallographic data of <b>3a</b>               | S76     |
| Molecular structure and crystallographic data of diphenylurea            | S77     |

## General methods

All reactions were carried out using standard Schlenk technique under nitrogen. DCE was distilled from CaH<sub>2</sub>. Unless noted, all commercial reagents were used without further purification. Melting points were recorded on a RY-1 microscopic melting apparatus and uncorrected. <sup>1</sup>H NMR spectra were recorded on 500 MHz and <sup>13</sup>C NMR spectra were recorded on 125 MHz by using a Bruker Avance 500 spectrometer. Chemical shifts were reported in parts per million ( $\delta$ ) relative to tetramethylsilane (TMS). Mass spectra were obtained on an Ultima Global spectrometer with an ESI source. Silica gel (200–300 mesh) for column chromatography and silica GF254 for TLC were produced by Qingdao Marine Chemical Company (China).

## Optimization of the reaction conditions<sup>[a]</sup>

Table S1

| 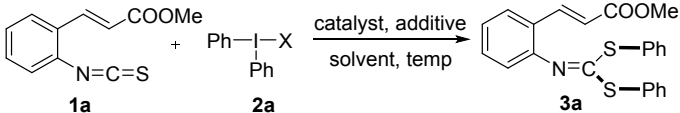 |                                 |                 |                           |            |           |                          |
|------------------------------------------------------------------------------------|---------------------------------|-----------------|---------------------------|------------|-----------|--------------------------|
| entry                                                                              | catalyst (mol %)                | X               | additive <sup>[b]</sup>   | solvent    | T [°C]    | yield [%] <sup>[c]</sup> |
| 1                                                                                  | CuCl (10)                       | OTf             |                           | DCE        | 80        | 35                       |
| 2                                                                                  | CuBr (10)                       | OTf             |                           | DCE        | 80        | 32                       |
| 3                                                                                  | CuTc (10)                       | OTf             |                           | DCE        | 80        | trace                    |
| 4                                                                                  | Cu(OTf) <sub>2</sub> (10)       | OTf             |                           | DCE        | 80        | 43(6) <sup>[d]</sup>     |
| <b>5</b>                                                                           | <b>Cu(OTf)<sub>2</sub> (10)</b> | OTf             | <b>H<sub>2</sub>O</b>     | <b>DCE</b> | <b>80</b> | <b>77</b>                |
| 6                                                                                  | Cu(OTf) <sub>2</sub> (10)       | OTf             | H <sub>2</sub> O (0.2 eq) | DCE        | 80        | 68                       |
| 7                                                                                  | Cu(OTf) <sub>2</sub> (10)       | OTf             | H <sub>2</sub> O (1.0 eq) | DCE        | 80        | 64                       |
| 8                                                                                  | Cu(OTf) <sub>2</sub> (5)        | OTf             | H <sub>2</sub> O          | DCE        | 80        | 46                       |
| 9                                                                                  | Cu(OTf) <sub>2</sub> (10)       | OTf             | H <sub>2</sub> O          | THF        | 80        | 10                       |
| 10                                                                                 | Cu(OTf) <sub>2</sub> (10)       | OTf             | H <sub>2</sub> O          | toluene    | 80        | 42                       |
| 11                                                                                 | Cu(OTf) <sub>2</sub> (10)       | OTf             | H <sub>2</sub> O          | DCM        | 60        | 34                       |
| 12                                                                                 | Cu(OTf) <sub>2</sub> (10)       | OTf             | H <sub>2</sub> O          | DCE        | 60        | 53                       |
| 13                                                                                 | Cu(OTf) <sub>2</sub> (10)       | OTf             | H <sub>2</sub> O          | DCE        | 100       | 62                       |
| 14 <sup>[e]</sup>                                                                  | Cu(OTf) <sub>2</sub> (10)       | OTf             | H <sub>2</sub> O          | DCE        | 80        | 45                       |
| 15 <sup>[f]</sup>                                                                  | Cu(OTf) <sub>2</sub> (10)       | OTf             | H <sub>2</sub> O          | DCE        | 80        | 56                       |
| 16                                                                                 | Cu(OTf) <sub>2</sub> (10)       | PF <sub>6</sub> | H <sub>2</sub> O          | DCE        | 80        | 50                       |
| 17                                                                                 | Cu(OTf) <sub>2</sub> (10)       | BF <sub>4</sub> | H <sub>2</sub> O          | DCE        | 80        | 36                       |
| 18 <sup>[g]</sup>                                                                  | Cu(OTf) <sub>2</sub> (10)       | OTf             | H <sub>2</sub> O          | DCE        | 80        | 38                       |
| 19 <sup>[h]</sup>                                                                  | Cu(OTf) <sub>2</sub> (10)       | OTf             | H <sub>2</sub> O          | DCE        | 80        | 32                       |
| 20                                                                                 | none                            | OTf             | H <sub>2</sub> O          | DCE        | 80        | trace                    |

[a] Reaction conditions: **1a** (0.3 mmol), **2a** (0.45 mmol), solvent (1.5 mL), 3 h, N<sub>2</sub>. [b] 0.5 equiv. [c] The isolated yield of **3a** was based on dividing the amount of **1a** by two (theoretical yield 0.15 mmol). [d] The reaction was performed under rigorously anhydrous conditions. [e] 1.0 equiv. of Ph<sub>2</sub>I(OTf) was used, 20% of **1a** was recovered after 12h. [f] 1.2 equiv. of Ph<sub>2</sub>I(OTf) was used, 13% of **1a** was recovered after 12h. [g] Mesitylphenyliodonium salt was instead of **2a**. [h] Under an air atmosphere.

To optimize the reaction conditions, different copper catalysts were initially screened using isothiocyanate **1a** and diphenyliodonium triflate **2a** (entries 1-4, Table 1). The result showed that Cu(OTf)<sub>2</sub> was superior to CuCl, CuBr, and CuTc, and providing **3a** in 43% yield (entry 4). The yield of **3a** was decreased to 6% when the reaction was performed under rigorously anhydrous conditions. Considering incidental water in the reaction system must serve as a nucleophile to attack the imidoyl carbocation, small amount of water was added to facilitate the reaction (entries 5-7). The results indicated 0.5 equiv water was the best choice (77%, entry 5). The yield of **3a** dropped to 46% when catalyst loading was reduced to 5 mol % (entry 8). Moreover, further solvent screening identified DCE as the best one, while THF, toluene, and DCM exhibited lower yields (entries 9-11). Diminished yields were obtained when the reaction was performed at elevated or decreased temperature (entries 12 and 13). When 1.0 equiv or 1.2 equiv diphenyliodonium triflate was used to react with **1a**, product **3a** was obtained in 45% or 56% yields after 12 h, and 20% or 13% of **1a** was recovered (entries 14 and 15). The yield of **3a** was reduced to 50% and 36% when hexafluorophosphate (PF<sub>6</sub><sup>-</sup>) and tetrafluoroborate (BF<sub>4</sub><sup>-</sup>) were used as the counterion of the diphenyliodonium salt (entries 16 and 17). When mesitylphenyliodonium salt was instead of **2a** also exhibited lower yield (entry 18). Carrying out the reaction under air resulted in lower yield (entry 19), whereas without Cu(OTf)<sub>2</sub> only a trace amount of **3a** was formed (entry 20). Careful optimization revealed that the reaction performed best at 80 °C in DCE with Cu(OTf)<sub>2</sub> (0.1 equiv) as the catalyst (entry 5).

### Preparation of starting materials

Diaryliodonium salts<sup>1</sup> and isothiocyanates<sup>2</sup> were prepared according to the literatures.

Methyl (*E*)-3-(2-isothiocyanatophenyl)acrylate **1a**<sup>3</sup> was prepared from the corresponding 2-iodoaniline.

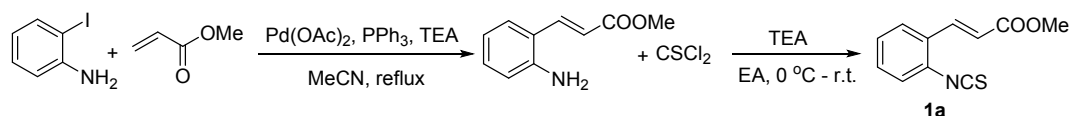

Under nitrogen atmosphere, a round-bottom flask was charged with a mixture of 2-iodoaniline (1.42 g, 6.5 mmol), methyl acrylate (0.78 g, 1.4 equiv), PPh<sub>3</sub> (0.21 g, 12 mol%), Pd(OAc)<sub>2</sub> (88 mg, 6 mol%), Et<sub>3</sub>N (0.79 g, 1.2 equiv) and acetonitrile (30 mL). The mixture was stirred for 24 h at 85 °C. The reaction was monitored by TLC. After completion, the inorganic precipitate was filtered through a celite pad. The filtrate was concentrated at the reduced pressure. Then, H<sub>2</sub>O (20 mL) was added to the reaction mixture and extracted with ethyl acetate (3 × 20 mL). The combined organic solution was washed with saturated NaCl solution, dried over anhydrous MgSO<sub>4</sub> and concentrated. The crude product was purified by column chromatography (silica, petroleum ether/ethyl acetate = 5:1) to give methyl (*E*)-3-(2-aminophenyl)acrylate (829 mg, 72%).

Thiophosgene (1.67 g, 5.6 mmol) diluted in a dry ethyl acetate was added dropwise to the solution of methyl (*E*)-3-(2-aminophenyl)acrylate and Et<sub>3</sub>N (1.18 g, 2.1 equiv) in cool-bath at least 5 min and the mixture was stirred at room temperature for 12 h. After completion, the inorganic salts were filtered, and the filtrate was concentrated at the reduced pressure. The crude product was purified by column chromatography (silica, petroleum ether/ethyl acetate = 30:1) to give methyl (*E*)-3-(2-isothiocyanatophenyl) acrylate **1a** (800 mg, 78%).

### General procedure for the synthesis of compounds **3** (**3a** for example)

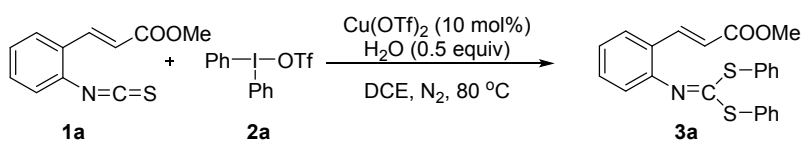

Under nitrogen atmosphere, a mixture of methyl (*E*)-3-(2-isothiocyanatophenyl) acrylate **1a** (110 mg, 0.50 mmol), diphenyliodonium triflate **2a** (323 mg, 0.75 mmol), Cu(OTf)<sub>2</sub> (18 mg, 0.05 mmol), H<sub>2</sub>O (4.5 mg, 0.25 mmol) and DCE (2.5 mL) was added to a dry Schlenk tube. The mixture was allowed to stir at 80 °C for 3 h. After completion, the mixture was cooled to room temperature, quenched with saturated NaHCO<sub>3</sub> and extracted with ethyl acetate. The organic layer was washed with saturated NaCl and dried over anhydrous MgSO<sub>4</sub>. The mixture was concentrated in vacuum and the residue was purified by flash column chromatography on silica gel (petroleum ether/ethyl acetate = 30:1) to afford methyl (*E*)-3-(2-((bis(phenylthio)methylene)amino)phenyl)acrylate **3a** as a light yellow solid (78 mg, 77%).

#### Procedure under rigorously anhydrous conditions (Table 1, entry 4)

*The flask was flame-dried, the starting materials and solvent were dried under the standard conditions, and the reaction mixture was degassed by freeze-pump-thaw procedure.*

#### Methyl (*E*)-3-(2-((bis(phenylthio)methylene)amino)phenyl)acrylate (**3a**)

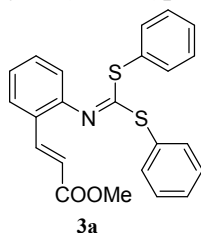

Light yellow solid, 78 mg, 77% yield, m.p. 114-116 °C. *R<sub>f</sub>* = 0.23 (petroleum ether/ethyl acetate = 30:1, v/v). <sup>1</sup>H NMR (CDCl<sub>3</sub>, 500 MHz): δ 3.85 (s, 3H), 6.33 (d, *J* = 16.1 Hz, 1H), 6.89 (d, *J* = 7.9 Hz, 1H), 7.06 (t, *J* = 7.5 Hz, 1H), 7.27 (t, *J* = 8.5 Hz, 1H), 7.39 (app s, 6H), 7.49 (d, *J* = 7.7 Hz, 1H), 7.58-7.59 (m, 4H), 7.67 (d, *J* = 16.1 Hz, 1H). <sup>13</sup>C NMR (CDCl<sub>3</sub>, 125 MHz): δ 51.6, 118.0, 120.5, 124.4, 125.5, 127.6, 129.1 (6C), 129.8 (2C), 130.5, 136.1 (4C), 141.4, 148.9, 162.9, 167.7. HRMS (ESI-TOF [M + H]<sup>+</sup>), *m/z* calcd for C<sub>23</sub>H<sub>20</sub>NO<sub>2</sub>S<sub>2</sub><sup>+</sup>: 406.0935, found: 406.0942.

### *N*-Phenylbis(phenylthio)methanimines (**3b**)

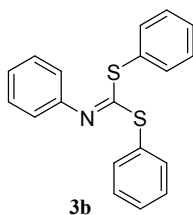

White solid, 73 mg, 91% yield, m.p. 115-117 °C.  $R_f$  = 0.23 (petroleum ether/ethyl acetate = 150:1, v/v).  $^1\text{H}$  NMR ( $\text{CDCl}_3$ , 500 MHz):  $\delta$  6.88 (d,  $J$  = 7.6 Hz, 2H), 7.08 (t,  $J$  = 7.4 Hz, 1H), 7.31 (t,  $J$  = 7.8 Hz, 2H), 7.38-7.39 (m, 6H), 7.58 (app s, 4H).  $^{13}\text{C}$  NMR ( $\text{CDCl}_3$ , 125 MHz):  $\delta$  120.2 (2C), 124.0, 128.8 (2C), 129.0 (2C), 129.5 (6C), 135.7 (4C), 149.7, 160.7. HRMS (ESI-TOF  $[\text{M} + \text{H}]^+$ ),  $m/z$  calcd for  $\text{C}_{19}\text{H}_{16}\text{NS}_2^+$ : 322.0724, found: 322.0719.

#### A mass balance of the reaction **1b** with **2a**

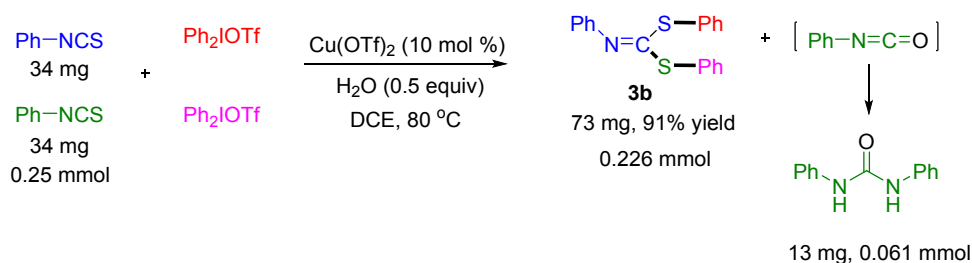

Under nitrogen atmosphere, a mixture of isothiocyanatobenzene **1b** (68 mg, 0.50 mmol), diaryliodonium salt **2a** (323 mg, 0.75 mmol),  $\text{Cu}(\text{OTf})_2$  (18 mg, 0.05 mmol),  $\text{H}_2\text{O}$  (4.5 mg, 0.25 mmol) and DCE (2.5 mL) was added to a dry Schlenk tube. The mixture was allowed to stir at 80 °C for 3 h. After completion, the mixture was cooled to room temperature, quenched with saturated  $\text{NaHCO}_3$  and extracted with ethyl acetate. The organic layer was washed with saturated  $\text{NaCl}$  and dried over anhydrous  $\text{MgSO}_4$ . The mixture was concentrated in vacuum and the residue was purified by flash column chromatography on silica gel (petroleum ether/ethyl acetate = 150:1 to 5:1) to afford *N*-phenylbis(phenylthio)methanimine **3b** (73 mg, 91%), and diphenylurea (13 mg) as a white solid.

*Note: As shown in the above scheme, this is actually a four component reaction ( $A_2B_2$  type), compound **3b** (shown by four different colors) contains the pieces of all “four starting materials”. Only a small amount of urea was isolated as a byproduct, and no isocyanate intermediate was isolated or detected. The process to generate urea from isocyanate was supported by previous reports.<sup>4</sup> The isocyanate decomposed to aniline, which provided the *N*-source to generate urea.*

## Variable-temperature NMR experiments

The products are pure according to the NMR spectra, but the peaks of –SAr show unusual shapes (broad singlets). The broad peaks are caused by C-S bond rotation. The NMR spectra of **3b** were improved when decreased the temperature to 273K to prevent the C-S bond rotation, e.g. the broad peak in 7.59 splits into two peaks 7.69 and 7.52 in <sup>1</sup>H NMR, and the broad peak in 135.5 splits into two peaks 136.9 and 134.9 in <sup>13</sup>C NMR.

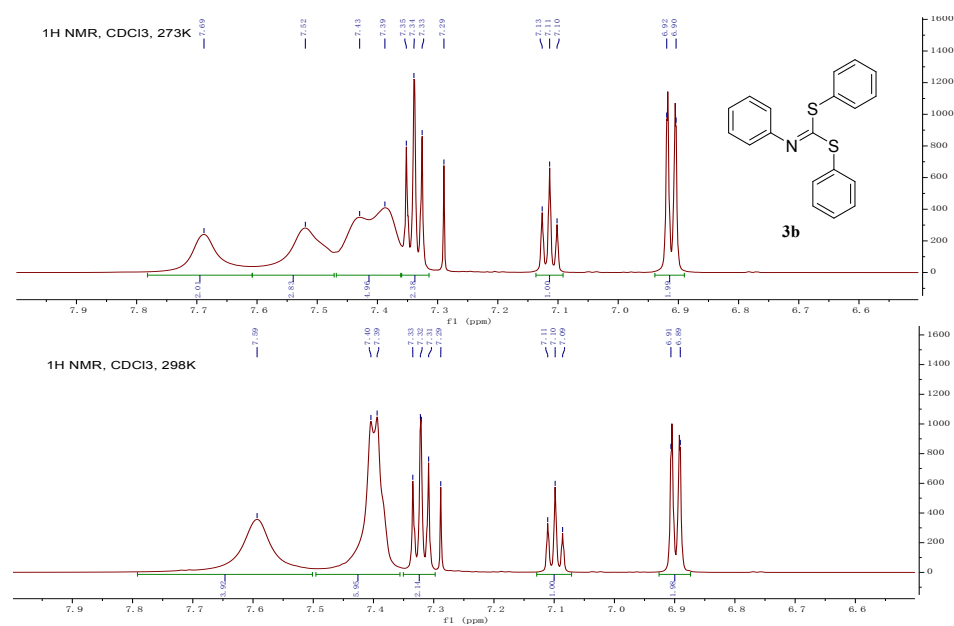

Compared <sup>1</sup>H NMR at 273 and 298K

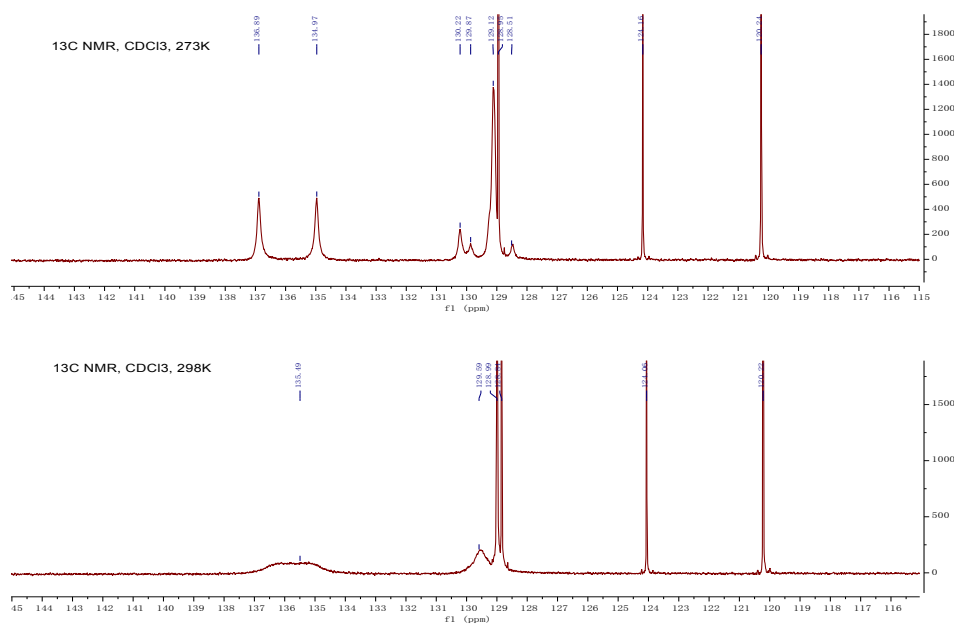

Compared <sup>13</sup>C NMR at 273 and 298K

***N*-(Phenyl)bis(*p*-tolylthio)methanimine (3c)**

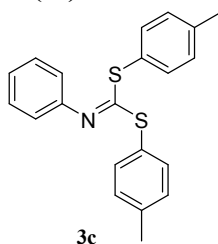

White solid, 83 mg, 95% yield, m.p. 152-154 °C.  $R_f$  = 0.25 (petroleum ether/ethyl acetate = 100:1, v/v).  $^1\text{H NMR}$  ( $\text{CDCl}_3$ , 500 MHz):  $\delta$  2.38 (br s, 6H), 6.87 (d,  $J$  = 7.8 Hz, 2H), 7.07 (t,  $J$  = 7.4 Hz, 1H), 7.19-7.20 (m, 4H), 7.30 (t,  $J$  = 7.7 Hz, 2H), 7.47 (app s, 4H).  $^{13}\text{C NMR}$  ( $\text{CDCl}_3$ , 125 MHz):  $\delta$  21.3 (2C), 120.2 (2C), 123.9, 126.0 (2C), 128.7 (4C), 129.8 (2C), 135.9 (4C), 139.8 (2C), 149.9, 161.7. HRMS (ESI-TOF  $[\text{M} + \text{H}]^+$ ),  $m/z$  calcd for  $\text{C}_{21}\text{H}_{20}\text{NS}_2^+$ : 350.1037, Found: 350.1045.

***N*-(Phenyl)bis(4-fluorophenylthio)methanimine (3d)**

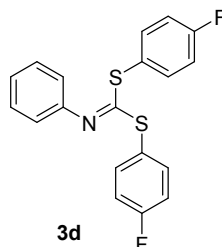

White solid, 63 mg, 71% yield, m.p. 93-95 °C.  $R_f$  = 0.25 (petroleum ether/ethyl acetate = 100:1, v/v).  $^1\text{H NMR}$  ( $\text{CDCl}_3$ , 500 MHz):  $\delta$  6.85 (d,  $J$  = 7.9 Hz, 2H), 7.07-7.10 (m, 5H), 7.31 (t,  $J$  = 7.8 Hz, 2H), 7.55 (app s, 4H).  $^{13}\text{C NMR}$  ( $\text{CDCl}_3$ , 125 MHz):  $\delta$  116.3 (d,  $^2J_{\text{C-F}}$  = 22.0 Hz, 4C), 120.1 (2C), 124.2, 128.9 (4C), 138.4 (4C), 149.4, 160.7. 163.8 (d,  $^1J_{\text{C-F}}$  = 257.5 Hz, 2C). HRMS (ESI-TOF  $[\text{M} + \text{H}]^+$ ),  $m/z$  calcd for  $\text{C}_{19}\text{H}_{14}\text{F}_2\text{NS}_2^+$ : 358.0536, found: 358.0529.

***N*-(Phenyl)bis(4-chlorophenylthio)methanimine (3e)**

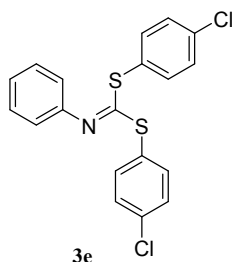

White solid, 73 mg, 75% yield, m.p.: 130-132 °C.  $R_f$  = 0.25 (petroleum ether/ethyl acetate = 100:1, v/v).  $^1\text{H NMR}$  ( $\text{CDCl}_3$ , 500 MHz):  $\delta$  6.82 (d,  $J$  = 7.8 Hz, 2H), 7.07 (t,  $J$  = 7.3 Hz, 1H), 7.27-7.34 (m, 6H), 7.47 (app s, 4H).  $^{13}\text{C NMR}$  ( $\text{CDCl}_3$ , 125 MHz):  $\delta$  120.1 (2C), 124.4, 129.0 (2C), 129.3 (6C), 136.5 (6C), 149.2, 159.7. HRMS (ESI-TOF  $[\text{M} + \text{H}]^+$ ),  $m/z$  calcd for  $\text{C}_{19}\text{H}_{14}\text{Cl}_2\text{NS}_2^+$ : 389.9939, found: 389.9950.

***N*-(Phenyl)bis(4-bromophenylthio)methanimine (3f)**

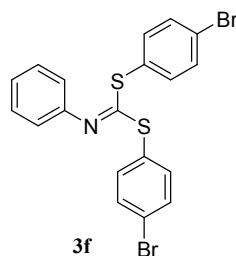

White solid, 84 mg, 70% yield, m.p. 155-157 °C.  $R_f$  = 0.23 (petroleum ether/ethyl acetate = 100:1, v/v).  $^1\text{H NMR}$  ( $\text{CDCl}_3$ , 500 MHz):  $\delta$  6.84 (d,  $J$  = 6.7 Hz, 2H), 7.10 (t,  $J$  = 6.6 Hz, 1H), 7.31 (t,  $J$  = 7.6 Hz, 2H), 7.42-7.52 (m, 8H).  $^{13}\text{C NMR}$  ( $\text{CDCl}_3$ , 125 MHz):  $\delta$  120.1 (2C), 124.4, 128.9 (4C), 132.3 (6C), 137.2 (4C), 149.2, 159.3. HRMS (ESI-TOF  $[\text{M} + \text{H}]^+$ ),  $m/z$  calcd for  $\text{C}_{19}\text{H}_{14}\text{Br}_2\text{NS}_2^+$ : 477.8934, found: 477.8942.

***N*-(Phenyl)bis(4-methoxyphenylthio)methanimine (3g)**

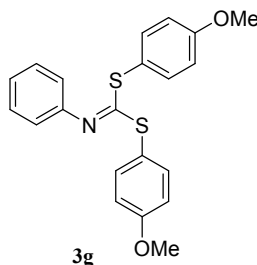

Yellow solid, 53 mg, 56% yield, m.p. 63-65 °C.  $R_f$  = 0.25 (petroleum ether/ethyl acetate = 60:1, v/v).  $^1\text{H NMR}$  ( $\text{CDCl}_3$ , 500 MHz):  $\delta$  3.81 (br s, 6H), 6.84-6.90 (m, 6H), 7.05 (t,  $J$  = 7.4 Hz, 1H), 7.28 (t,  $J$  = 7.8 Hz, 2H), 7.46 (app s, 4H).  $^{13}\text{C NMR}$  ( $\text{CDCl}_3$ , 125 MHz):  $\delta$  55.3 (2C), 114.6, 120.2, 123.8 (6C), 128.8 (2C), 137.6, 150.0 (2C), 160.9 (4C), 162.9 (2C). HRMS (ESI-TOF  $[\text{M} + \text{H}]^+$ ),  $m/z$  calcd for  $\text{C}_{21}\text{H}_{20}\text{NO}_2\text{S}_2^+$ : 382.0930, found: 382.0930.

***N*-(Phenyl)bis(4-(trifluoromethyl)phenylthio)methanimine (3h)**

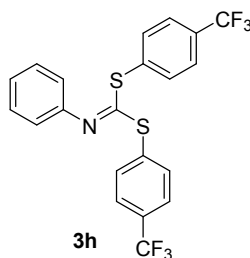

White solid, 98 mg, 86% yield, m.p. 102-104 °C.  $R_f$  = 0.25 (petroleum ether/ethyl acetate = 60:1, v/v).  $^1\text{H NMR}$  ( $\text{CDCl}_3$ , 500 MHz):  $\delta$  6.83 (d,  $J$  = 7.7 Hz, 2H), 7.09 (t,  $J$  = 7.4 Hz, 1H), 7.29 (t,  $J$  = 7.7 Hz, 2H), 7.59-7.66 (m, 8H).  $^{13}\text{C NMR}$  ( $\text{CDCl}_3$ , 125 MHz):  $\delta$  120.1 (2C), 122.7, 124.7 (4C), 125.9 (2C), 129.0 (4C), 131.6 (q,  $J$  = 33.2 Hz, 2C), 134.1 (2C), 135.4 (2C), 148.9, 157.5. HRMS (ESI-TOF  $[\text{M} + \text{H}]^+$ ),  $m/z$  calcd for  $\text{C}_{21}\text{H}_{14}\text{F}_6\text{NS}_2^+$ : 458.0472, found: 458.0485.



**Di-methyl-4,4'-(((phenylimino)methylene)bis(sulfanediyl)dibenzoate (3i)**

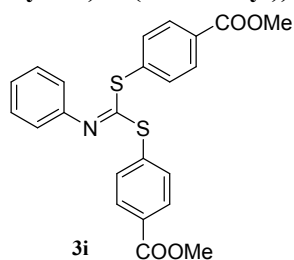

White solid, 79 mg, 72% yield, m.p. 168-170 °C.  $R_f = 0.22$  (petroleum ether/ethyl acetate = 40:1, v/v).  $^1\text{H NMR}$  ( $\text{CDCl}_3$ , 500 MHz):  $\delta$  3.92 (s, 6H), 6.84 (d,  $J = 7.8$  Hz, 2H), 7.08 (t,  $J = 7.4$  Hz, 1H), 7.28 (t,  $J = 7.8$  Hz, 2H), 7.60-7.61 (m, 4H), 8.01 (d,  $J = 8.2$  Hz, 4H).  $^{13}\text{C NMR}$  ( $\text{CDCl}_3$ , 125 MHz):  $\delta$  52.3 (2C), 120.1 (2C), 124.5, 128.9 (2C), 130.0 (4C), 130.9 (2C), 135.4 (6C), 149.0, 158.1, 166.3 (2C). HRMS (ESI-TOF  $[\text{M} + \text{H}]^+$ ),  $m/z$  calcd for  $\text{C}_{23}\text{H}_{20}\text{NO}_4\text{S}_2^+$ : 438.0828, found: 438.0838.

***N*-(Phenyl)bis(*o*-tolylthio)methanimine (3j)**

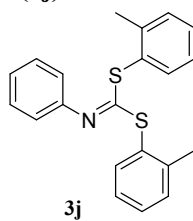

Yellow oil, 47 mg, 53% yield.  $R_f = 0.25$  (petroleum ether/ethyl acetate = 150:1, v/v).  $^1\text{H NMR}$  ( $\text{CDCl}_3$ , 500 MHz):  $\delta$  2.52 (br s, 6H), 6.86 (d,  $J = 7.8$  Hz, 2H), 7.06 (t,  $J = 7.4$  Hz, 1H), 7.20 (app s, 2H), 7.28-7.31 (m, 6H), 7.53 (app s, 2H).  $^{13}\text{C NMR}$  ( $\text{CDCl}_3$ , 125 MHz):  $\delta$  21.0 (2C), 120.1 (2C), 123.9, 126.5 (2C), 128.8 (2C), 130.6 (2C), 136.2 (2C), 137.7 (2C), 143.1 (4C), 150.1, 160.4. HRMS (ESI-TOF  $[\text{M} + \text{H}]^+$ ),  $m/z$  calcd for  $\text{C}_{21}\text{H}_{20}\text{NS}_2^+$ : 350.1037, found: 350.1043.

***N*-(Phenyl)bis(*m*-tolylthio)methanimine (3k)**

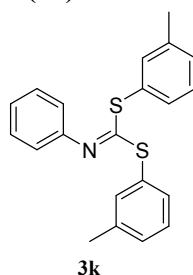

White solid, 61 mg, 70% yield, m.p. 110-112 °C.  $R_f = 0.25$  (petroleum ether/ethyl acetate = 100:1, v/v).  $^1\text{H NMR}$  ( $\text{CDCl}_3$ , 500 MHz):  $\delta$  2.35 (br s, 6H), 6.87 (d,  $J = 7.9$  Hz, 2H), 7.06 (t,  $J = 7.3$  Hz, 1H), 7.19 (app s, 2H), 7.24-7.31 (m, 4H), 7.37 (app s, 4H).  $^{13}\text{C NMR}$  ( $\text{CDCl}_3$ , 125 MHz):  $\delta$  21.2 (2C), 120.2 (2C), 123.9, 128.7 (2C), 129.2 (4C), 130.3 (2C), 132.7 (2C), 136.1 (2C), 138.7 (2C),

149.8, 161.1. HRMS (ESI-TOF  $[M + H]^+$ ),  $m/z$  calcd for  $C_{21}H_{20}NS_2^+$ : 350.1037, found: 350.1042.

***N*-(*p*-Tolyl)bis(phenylthio)methanimine (3l)**

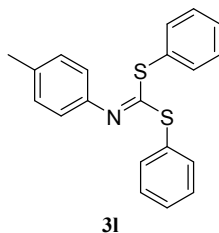

White solid, 66 mg, 79% yield, m.p. 127-129 °C.  $R_f$  = 0.22 (petroleum ether/ethyl acetate = 150:1, v/v).  $^1H$  NMR ( $CDCl_3$ , 500 MHz):  $\delta$  2.30 (s, 3H), 6.77 (d,  $J$  = 7.9 Hz, 2H), 7.09 (d,  $J$  = 7.9 Hz, 2H), 7.35 (app s, 6H), 7.54 (app s, 4H).  $^{13}C$  NMR ( $CDCl_3$ , 125 MHz):  $\delta$  21.0, 120.1 (4C), 129.0 (4C), 129.4 (4C), 133.6, 135.0 (2C), 136.3 (2C), 147.1, 160.3. HRMS (ESI-TOF  $[M + H]^+$ ),  $m/z$  calcd for  $C_{20}H_{18}NS_2^+$ : 336.0881, found: 336.0892.

***N*-(4-Fluorophenyl)bis(phenylthio)methanimine (3m)**

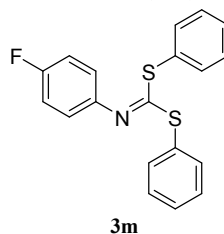

White solid, 68 mg, 80% yield, m.p. 73-75 °C.  $R_f$  = 0.20 (petroleum ether/ethyl acetate = 150:1, v/v).  $^1H$  NMR ( $CDCl_3$ , 500 MHz):  $\delta$  6.80-6.83 (m, 2H), 6.97 (t,  $J$  = 8.6 Hz, 2H), 7.37 (app s, 6H), 7.54 (app s, 4H).  $^{13}C$  NMR ( $CDCl_3$ , 125 MHz):  $\delta$  115.5 (d,  $^2J_{C-F}$  = 21.8 Hz, 2C), 121.6 (2C), 121.7 (2C), 129.1 (4C), 129.8, 135.1 (2C), 136.5 (2C), 145.6, 145.7, 159.7 (d,  $^1J_{C-F}$  = 242.5 Hz), 161.8. HRMS (ESI-TOF  $[M + H]^+$ ),  $m/z$  calcd for  $C_{19}H_{15}FNS_2^+$ : 340.0625, found: 340.0622.

***N*-(4-Chlorophenyl)bis(phenylthio)methanimine (3n)**

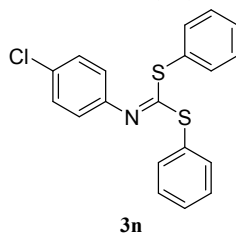

White solid, 63 mg, 71% yield, m.p. 83-85 °C.  $R_f$  = 0.25 (petroleum ether/ethyl acetate = 150:1, v/v).  $^1H$  NMR ( $CDCl_3$ , 500 MHz):  $\delta$  6.79 (d,  $J$  = 8.5 Hz, 2H), 7.24 (d,  $J$  = 8.5 Hz, 2H), 7.37-7.39 (m, 6H), 7.55 (app s, 4H).  $^{13}C$  NMR ( $CDCl_3$ , 125 MHz):  $\delta$  121.7 (2C), 128.9, 129.1 (2C), 129.3 (2C), 129.7 (6C), 135.8 (4C), 148.1, 162.2. HRMS (ESI-TOF  $[M + H]^+$ ),  $m/z$  calcd for  $C_{19}H_{15}ClNS_2^+$ : 356.0329, found: 356.0336.

***N*-(4-Bromophenyl)bis(phenylthio)methanimine (3o)**

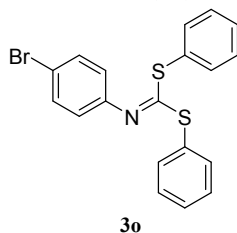

White solid, 67 mg, 67% yield, m.p. 105-106 °C.  $R_f$  = 0.24 (petroleum ether/ethyl acetate = 150:1, v/v).  $^1\text{H NMR}$  ( $\text{CDCl}_3$ , 500 MHz):  $\delta$  6.74 (d,  $J$  = 8.5 Hz, 2H), 7.38-7.39 (m, 8H), 7.55 (app s, 4H).  $^{13}\text{C NMR}$  ( $\text{CDCl}_3$ , 125 MHz):  $\delta$  117.1, 122.1 (2C), 129.1 (2C), 129.7 (6C), 131.8 (2C), 135.7 (4C), 148.6, 162.1. HRMS (ESI-TOF  $[\text{M} + \text{H}]^+$ ),  $m/z$  calcd for  $\text{C}_{19}\text{H}_{15}\text{BrNS}_2^+$ : 399.9824, Found: 399.9831.

***N*-(4-Methoxyphenyl)bis(phenylthio)methanimine (3p)**

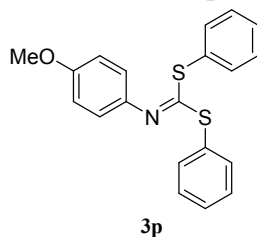

White solid, 78 mg, 89% yield, m.p. 102-104 °C.  $R_f$  = 0.23 (petroleum ether/ethyl acetate = 150:1, v/v).  $^1\text{H NMR}$  ( $\text{CDCl}_3$ , 500 MHz):  $\delta$  3.77 (s, 3H), 6.81-6.85 (m, 4H), 7.35 (app s, 6H), 7.54 (app s, 4H).  $^{13}\text{C NMR}$  ( $\text{CDCl}_3$ , 125 MHz):  $\delta$  55.5, 114.1 (2C), 121.8 (2C), 128.9 (4C), 134.7 (4C), 136.3 (4C), 142.9, 156.5, 160.3. HRMS (ESI-TOF  $[\text{M} + \text{H}]^+$ ),  $m/z$  calcd for  $\text{C}_{20}\text{H}_{18}\text{NOS}_2^+$ : 352.0830, found: 352.0832.

***N*-(4-(Trifluoromethyl)phenyl)bis(phenylthio)methanimine (3q)**

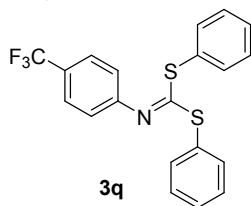

White solid, 65 mg, 67% yield, m.p. 83-85 °C.  $R_f$  = 0.25 (petroleum ether/ethyl acetate = 150:1, v/v).  $^1\text{H NMR}$  ( $\text{CDCl}_3$ , 500 MHz):  $\delta$  6.90 (d,  $J$  = 8.2 Hz, 2H), 7.35-7.37 (m, 6H), 7.49-7.53 (m, 6H).  $^{13}\text{C NMR}$  ( $\text{CDCl}_3$ , 125 MHz):  $\delta$  120.3 (3C), 125.8 (4C), 129.1 (4C), 129.8 (3C), 135.8 (4C), 152.7, 162.9. HRMS (ESI-TOF  $[\text{M} + \text{H}]^+$ ),  $m/z$  calcd for  $\text{C}_{20}\text{H}_{15}\text{F}_3\text{NS}_2^+$ : 390.0593, found: 390.0603.

***N*-(2-Chlorophenyl)bis(phenylthio)methanimine (3r)**

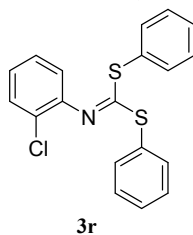

Light yellow oil, 49 mg, 55% yield.  $R_f = 0.24$  (petroleum ether/ethyl acetate = 100:1, v/v).  $^1\text{H}$  NMR ( $\text{CDCl}_3$ , 500 MHz):  $\delta$  6.86 (d,  $J = 7.8$  Hz, 1H), 6.96-6.99 (m, 1H), 7.15 (t,  $J = 7.6$  Hz, 1H), 7.32-7.37 (m, 7H), 7.59 (app s, 4H).  $^{13}\text{C}$  NMR ( $\text{CDCl}_3$ , 125 MHz):  $\delta$  121.3, 124.8, 127.0, 129.0 (6C), 129.7 (4C), 135.7 (4C), 146.7, 163.7. HRMS (ESI-TOF  $[\text{M} + \text{H}]^+$ ),  $m/z$  calcd for  $\text{C}_{19}\text{H}_{15}\text{ClNS}_2^+$ : 356.0328, found: 356.0329.

***N*-(3-Chlorophenyl)bis(phenylthio)methanimine (3s)**

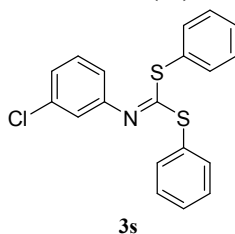

White solid, 65 mg, 73% yield, m.p. 98-100 °C.  $R_f = 0.23$  (petroleum ether/ethyl acetate = 100:1, v/v).  $^1\text{H}$  NMR ( $\text{CDCl}_3$ , 500 MHz):  $\delta$  6.74 (d,  $J = 7.9$  Hz, 1H), 6.85 (s, 1H), 7.02 (d,  $J = 7.9$  Hz, 1H), 7.19 (t,  $J = 8.0$  Hz, 1H), 7.37-7.38 (m, 6H), 7.55 (app s, 4H).  $^{13}\text{C}$  NMR ( $\text{CDCl}_3$ , 125 MHz):  $\delta$  118.5, 120.5, 123.9, 129.1 (6C), 129.8 (3C), 134.3, 136.0 (4C), 150.7, 162.7. HRMS (ESI-TOF  $[\text{M} + \text{H}]^+$ ),  $m/z$  calcd for  $\text{C}_{19}\text{H}_{15}\text{ClNS}_2^+$ : 356.0328, found: 356.0329.

***N*-Pyridin-2-ylbis(phenylthio)methanimine (3t)**

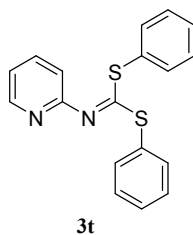

Light yellow solid, 26 mg, 32% yield, m.p. 98-100 °C.  $R_f = 0.23$  (petroleum ether/ethyl acetate = 30:1, v/v).  $^1\text{H}$  NMR ( $\text{CDCl}_3$ , 500 MHz):  $\delta$  6.82 (d,  $J = 8.0$  Hz, 1H), 6.97-6.99 (m, 1H), 7.36-7.38 (m, 6H), 7.58-7.61 (m, 5H), 8.41 (d,  $J = 4.6$  Hz, 1H).  $^{13}\text{C}$  NMR ( $\text{CDCl}_3$ , 125 MHz):  $\delta$  117.9, 119.7, 129.0 (2C), 129.6 (6C), 136.0 (4C), 137.7, 148.0, 160.0, 165.4. HRMS (ESI-TOF  $[\text{M} + \text{H}]^+$ ),  $m/z$  calcd for  $\text{C}_{18}\text{H}_{15}\text{N}_2\text{S}_2^+$ : 323.0671, found: 323.0678.

***N*-Naphthalen-1-ylbis(phenylthio)methanimine (3u)**

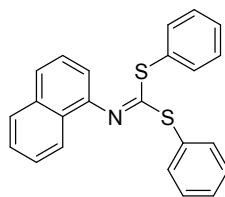

3u

Yellow solid, 62 mg, 67% yield, m.p. 115-117 °C.  $R_f$  = 0.25 (petroleum ether/ethyl acetate = 40:1, v/v).  $^1\text{H}$  NMR ( $\text{CDCl}_3$ , 500 MHz):  $\delta$  6.97 (d,  $J$  = 7.3 Hz, 1H), 7.37-7.46 (m, 9H), 7.55-7.60 (m, 5H), 7.69 (d,  $J$  = 8.1 Hz, 1H), 7.78 (d,  $J$  = 7.9 Hz, 1H).  $^{13}\text{C}$  NMR ( $\text{CDCl}_3$ , 125 MHz):  $\delta$  114.9, 123.5, 124.2, 125.4, 125.5, 126.1 (2C), 126.5, 127.8 (2C), 129.0 (4C), 129.9 (2C), 134.2, 136.0 (4C), 145.8, 161.7. HRMS (ESI-TOF  $[\text{M} + \text{H}]^+$ ),  $m/z$  calcd for  $\text{C}_{23}\text{H}_{18}\text{NS}_2^+$ : 372.0881, found: 372.0892.

***N*-Benzo[*d*][1,3]dioxol-5-ylbis(phenylthio)methanimine (3v)**

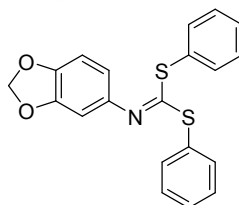

3v

White solid, 75 mg, 82% yield, m.p. 105-107 °C.  $R_f$  = 0.23 (petroleum ether/ethyl acetate = 60:1, v/v).  $^1\text{H}$  NMR ( $\text{CDCl}_3$ , 500 MHz):  $\delta$  5.91 (s, 2H), 6.32-6.33 (m, 1H), 6.41-6.42 (m, 1H), 6.72 (d,  $J$  = 8.2 Hz, 1H), 7.36 (app s, 6H), 7.53 (app s, 4H).  $^{13}\text{C}$  NMR ( $\text{CDCl}_3$ , 125 MHz):  $\delta$  101.1, 102.3 (2C), 108.2, 112.8 (2C), 129.1 (4C), 129.9 (2C), 134.9 (2C), 136.5 (2C), 144.0, 144.2, 147.8, 161.1. HRMS (ESI-TOF  $[\text{M} + \text{H}]^+$ ),  $m/z$  calcd for  $\text{C}_{20}\text{H}_{16}\text{NO}_2\text{S}_2^+$ : 366.0617, found: 366.0628.

***N*-Methylbis(phenylthio)methanimine (3w)**

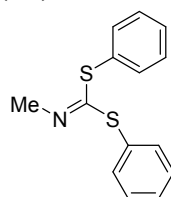

3w

Light yellow solid, 36 mg, 56% yield, m.p. 70-72 °C,  $R_f$  = 0.21 (petroleum ether/ethyl acetate = 60:1, v/v).  $^1\text{H}$  NMR ( $\text{CDCl}_3$ , 500 MHz):  $\delta$  3.29 (s, 3H), 7.30-7.32 (m, 3H), 7.37-7.43 (m, 5H), 7.59 (d,  $J$  = 7.1 Hz, 2H).  $^{13}\text{C}$  NMR ( $\text{CDCl}_3$ , 125 MHz):  $\delta$  41.4, 128.8, 129.1 (2C), 129.2 (2C), 129.6, 130.7, 134.6, 135.2 (2C), 135.5 (2C), 157.1. HRMS (ESI-TOF  $[\text{M} + \text{H}]^+$ ),  $m/z$  calcd for  $\text{C}_{14}\text{H}_{14}\text{NS}_2^+$ : 260.0562, found: 260.0562.

### *N*-Cyclohexylbis(phenylthio)methanimine (**3x**)

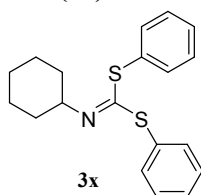

White solid, 58 mg, 71% yield, m.p. 76-78 °C.  $R_f = 0.25$  (petroleum ether/ethyl acetate = 100:1, v/v).  $^1\text{H NMR}$  ( $\text{CDCl}_3$ , 500 MHz):  $\delta$  1.20-1.67 (m, 10H), 3.76-3.80 (m, 1H), 7.25 (s, 3H), 7.30-7.42 (m, 5H), 7.50-7.56 (m, 2H).  $^{13}\text{C NMR}$  ( $\text{CDCl}_3$ , 125 MHz):  $\delta$  24.1 (2C), 25.7, 33.0 (2C), 62.5, 128.1, 128.4, 128.9 (2C), 129.4, 130.6, 131.6, 134.0, 135.0 (2C), 135.4 (2C), 151.8. HRMS (ESI-TOF  $[\text{M} + \text{H}]^+$ ),  $m/z$  calcd for  $\text{C}_{19}\text{H}_{22}\text{NS}_2^+$ : 328.1188, found: 328.1190.

### Phenyl *p*-tolyl (*E*)-phenylcarbonimidodithioate (**4**)

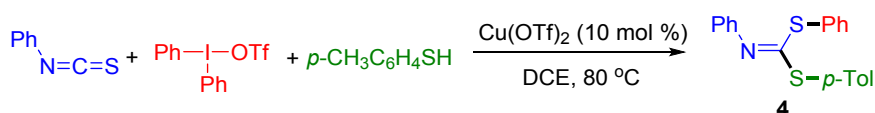

Under nitrogen atmosphere, a mixture of isothiocyanatobenzene **1b** (68 mg, 0.50 mmol), diaryliodonium salt **2a** (323 mg, 0.75 mmol),  $\text{Cu}(\text{OTf})_2$  (18 mg, 0.05 mmol) and DCE (2.0 mL) was added to a dry Schlenk tube, after stirring at 80 °C for 10 minute, *p*-toluenethiol (62 mg, 0.5 mmol) dissolved in DCE (0.5 mL) was added dropwise to the mixture. The mixture was stirring for 3 h. After completion, the mixture was cooled to room temperature, quenched with saturated  $\text{NaHCO}_3$  and extracted with ethyl acetate. The organic layer was washed with saturated NaCl, dried over anhydrous  $\text{MgSO}_4$ , and concentrated in vacuum. The residue was purified by flash column chromatography on silica gel (petroleum ether/ethyl acetate = 150:1) to afford compound **4** as a white solid.

White solid, 104 mg, 62% yield, m.p. 85-87 °C.  $R_f = 0.25$  (petroleum ether/ethyl acetate = 150:1, v/v).  $^1\text{H NMR}$  (DMSO, 500 MHz):  $\delta$  2.31 (s, 3H), 6.70 (t,  $J = 6.6$  Hz, 2H), 7.05 (t,  $J = 7.3$  Hz, 1H), 7.24-7.31 (m, 4H), 7.42-7.55 (m, 7H).  $^{13}\text{C NMR}$  (DMSO, 125 MHz):  $\delta$  21.3, 120.2 (2C), 124.5, 129.5 (3C), 129.7 (3C), 130.5 (3C), 135.9 (4C), 140.4, 149.6, 160.8. HRMS (ESI-TOF  $[\text{M} + \text{H}]^+$ ),  $m/z$  calcd for  $\text{C}_{19}\text{H}_{22}\text{NS}_2^+$ : 336.0875, found: 336.0876.

### Scale-up reaction and synthetic transformation:

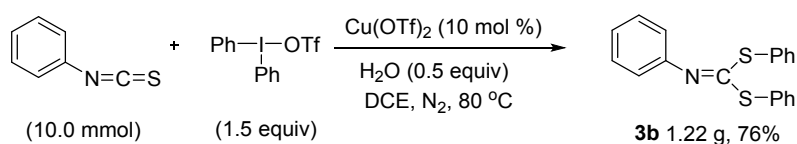

Under  $\text{N}_2$ , to a dry Schlenk tube was charged with a mixture of isothiocyanatobenzene **1b** (1.35 g, 10.0 mmol), diphenyliodonium salt **2a** (6.45 g, 15.0 mmol),  $\text{Cu}(\text{OTf})_2$  (0.36 g, 1.0 mmol),  $\text{H}_2\text{O}$  (90

mg, 5.0 mmol) and DCE (50 mL). The mixture was allowed to stir at 80 °C for 3 h. After completion, the mixture was cooled to room temperature, quenched with saturated NaHCO<sub>3</sub> and extracted with ethyl acetate. The organic layer was washed with saturated NaCl and dried over anhydrous MgSO<sub>4</sub>. The mixture was concentrated in vacuum and the residue was purified by flash column chromatography on silica gel (petroleum ether/ethyl acetate = 150:1) to afford *N*-phenylbis(phenylthio)methanimine **3b** as a white solid (1.22 g, 76%).

#### **S-Phenyl phenylcarbamothioate (5)<sup>5</sup>**

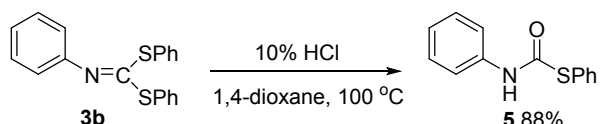

*N*-Phenylbis(phenylthio)methanimine **3b** (129 mg, 0.4 mmol) and 10% HCl (0.4 mL) was dissolved in 1,4-dioxane (2.0 mL) and the reaction temperature was heated to 100 °C for 3 h. After completion, the mixture was cooled to room temperature, poured into ice-cold diluted saturated NaHCO<sub>3</sub>, and extracted with ethyl acetate. The organic layer was washed with saturated NaCl and dried over anhydrous MgSO<sub>4</sub>. The mixture was concentrated in vacuum and the residue was purified by flash column chromatography on silica gel to afford **5** as a pale yellow solid (81 mg, 88%), m.p. 123-125 °C. *R<sub>f</sub>* = 0.2 (petroleum ether/ethyl acetate = 20:1, v/v). IR (KBr, ν, cm<sup>-1</sup>): 3252 (NH), 3191, 3127, 3050, 3014, 1661 (C=O), 1597, 1538, 1500, 1442, 749, 690, 643.

#### **Phenyl (Z)-*N*-phenylbenzimidothioate (6)<sup>6</sup>**

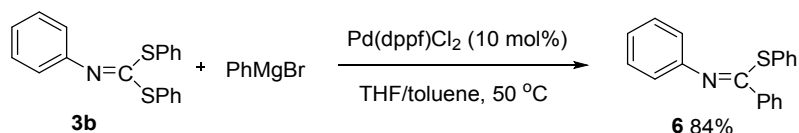

Under nitrogen atmosphere, phenylmagnesium bromide<sup>7</sup> (0.8 mmol, 1.0 M, 0.8 mL) was added to a mixture of **3b** (129 mg, 0.4 mmol) and Pd(dppf)Cl<sub>2</sub> (29 mg, 0.04 mmol) in dry toluene (0.8 mL) at room temperature. The reaction mixture was stirred at 50 °C for 5 h. After completion, the mixture was quenched with water (10.0 mL) and extracted with ethyl acetate (3 × 10 mL). The combined organic layer was dried over anhydrous MgSO<sub>4</sub> and concentrated in vacuum. The residue was purified by flash chromatography on silica gel to afford the desired products **6** as a yellow solid (97 mg, 84%), m.p. 70-72 °C, *R<sub>f</sub>* = 0.21 (petroleum ether/ethyl acetate = 60:1, v/v). <sup>1</sup>H NMR (CDCl<sub>3</sub>, 500 MHz): δ 6.99 (s, 2H), 7.07 (s, 3H), 7.14 (s, 3H), 7.21-7.27 (m, 3H), 7.35-7.44 (m, 2H), 7.67 (s, 2H). <sup>13</sup>C NMR (CDCl<sub>3</sub>, 125 MHz): δ 29.4, 119.9, 124.3, 127.6, 127.9, 128.3, 128.7, 128.8, 129.2, 130.0, 132.3, 133.3, 137.5, 150.3, 163.7. HRMS (ESI-TOF [M + H]<sup>+</sup>), *m/z* calcd for C<sub>19</sub>H<sub>16</sub>NS<sup>+</sup>: 290.0998, found: 290.0996.

### (Z)-(1-(p-Tolyl)ethene-1, 2-diyl)bis(phenylsulfane) (**7**)<sup>8</sup>

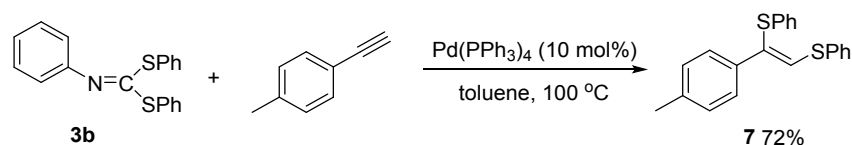

Under N<sub>2</sub>, 1-ethynyl-4-methylbenzene (93 mg, 0.8 mmol) was added dropwise to a mixture of **3b** (129 mg, 0.4 mmol) and Pd(PPh<sub>3</sub>)<sub>4</sub> (46 mg, 0.04 mmol) in dry toluene (1.5 mL) at room temperature. The reaction mixture was carried out at 100 °C for 3 h. After completion, the mixture was concentrated in vacuum and the residue was purified by flash column chromatography on silica gel to afford **7** as a light yellow oil (96 mg, 72%), R<sub>f</sub> = 0.3 (petroleum ether/ethyl acetate = 100:1, v/v). <sup>1</sup>H NMR (CDCl<sub>3</sub>, 500 MHz): δ 2.28 (s, 3H), 7.05 (d, *J* = 8.0 Hz, 2H), 7.08 (t, *J* = 7.6 Hz, 1H), 7.18 (t, *J* = 7.7 Hz, 2H), 7.21 (s, 1H), 7.24 (d, *J* = 8.5 Hz, 2H), 7.29 (t, *J* = 7.3 Hz, 1H), 7.36 (t, *J* = 7.5 Hz, 2H), 7.45 (d, *J* = 8.0 Hz, 2H), 7.49 (d, *J* = 7.7 Hz, 2H). <sup>13</sup>C NMR (CDCl<sub>3</sub>, 125 MHz): δ 21.1, 125.8, 126.6, 127.4, 128.1, 128.8, 129.1, 129.2, 129.3, 130.5, 134.8, 135.3, 135.5, 135.9, 137.5. HRMS (ESI-TOF [M + H]<sup>+</sup>), *m/z* calcd for C<sub>21</sub>H<sub>19</sub>S<sub>2</sub><sup>+</sup>: 335.0923, found: 335.0923.

### 4-Phenyl-5-(phenylthio)-2,4-dihydro-3H-1,2,4-triazol-3-one (**8**)

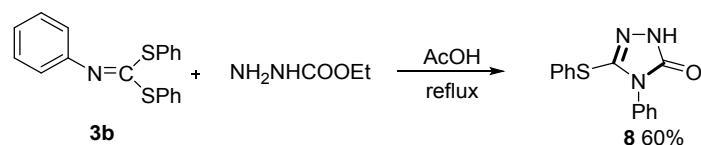

A mixture of **3b** (129 mg, 0.4 mmol), ethyl hydrazinecarboxylate (107 mg, 1.0 mmol) and acetic acid (2.0 mL) was stirred at 120 °C for 24 h. After completion, the mixture was cooled to room temperature, quenched with saturated NaHCO<sub>3</sub>, extracted with ethyl acetate (3 × 10 mL) and concentrated in vacuum. The residue was purified by flash chromatography on silica gel to afford the desired products **8** as a white solid (65 mg, 60%), m.p. 157-158 °C. R<sub>f</sub> = 0.15 (petroleum ether/ethyl acetate = 3:1, v/v). <sup>1</sup>H NMR (CDCl<sub>3</sub>, 500 MHz): δ 7.18-7.21 (m, 2H), 7.24-7.28 (m, 5H), 7.39-7.40 (m, 3H), 10.31 (s, 1H). <sup>13</sup>C NMR (CDCl<sub>3</sub>, 125 MHz): δ 127.3, 128.7, 128.8, 129.1, 129.2, 129.3, 132.1, 132.3, 143.2, 155.0. HRMS (ESI-TOF [M + H]<sup>+</sup>), *m/z* calcd for C<sub>14</sub>H<sub>12</sub>N<sub>3</sub>OS<sup>+</sup>: 270.0696, found: 270.0695.

### 3,4-Diphenyl-5-(phenylthio)-4H-1,2,4-triazole (**9**)<sup>9</sup>

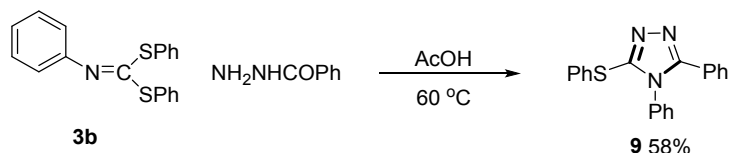

A mixture of **3b** (129 mg, 0.4 mmol), benzohydrazide (136 mg, 1.0 mmol) and acetic acid (2.0 mL) was stirred at 60 °C for 8 h. After cooled to room temperature, the mixture was quenched with saturated NaHCO<sub>3</sub>, extracted with ethyl acetate and concentrated. The residue was purified by



flash chromatography on silica gel to afford the desired products **9** as a white solid (76 mg, 58%), m.p. 167-169 °C.  $R_f$  = 0.12 (petroleum ether/ethyl acetate = 5:1, v/v).  $^1\text{H}$  NMR ( $\text{CDCl}_3$ , 500 MHz):  $\delta$  7.01 (d,  $J$  = 7.6 Hz, 2H), 7.21-7.27 (m, 7H), 7.31-7.45 (m, 6H).  $^{13}\text{C}$  NMR ( $\text{CDCl}_3$ , 125 MHz):  $\delta$  126.5, 127.6, 128.1, 128.3, 128.4, 129.2, 129.5, 129.7, 129.9, 131.0, 131.4, 134.4, 150.3, 155.7. HRMS (ESI-TOF  $[\text{M} + \text{H}]^+$ ),  $m/z$  calcd for  $\text{C}_{20}\text{H}_{16}\text{N}_3\text{S}^+$ : 330.1059, found: 330.1059.

## References

1. (a) M. Bielawski, M. Z. Zhu and B. Olofssona, *Adv. Synth. Catal.* 2007, **349**, 2610; (b) M. Zhu, N. Jalalian and B. Olofsson, *Synlett.* 2008, **4**, 592.
2. (a) D. J. Le-count, D. J. Dewsbury and W. Grundy, *Synthesis* 1977, 582; (b) P. F. Liu, C. Y. Li, J. W. Zhang and X. Y. Xu, *Synth. Commun.* 2013, **43**, 3342.
3. (a) Shuhei Fukamachi; Hisatoshi Konishi and Kazuhiro Kobayashi. *Synthesis* 2010, **10**, 1593; (b) W. Y. Hao, J. Huang, S. S. Jie and M. Z. Cai, *Eur. J. Org. Chem.* 2015, 6655.
4. (a) F. Albericio and G. Barany, *Int. J. Peptide Protein Res.* 1987, **30**, 177; (b) M. S. Lee, *Chem. Res. Toxicol.* 1992, **5**, 791.
5. H. K. Oh, J. E. Park, D. D. Sung and I. Lee, *J. Org. Chem.* 2004, **69**, 3150.
6. A. W. Chapman, *J. Chem. Soc.* 1926, **129**, 2296.
7. F. W. Walker and E. C. Ashby, *J. Am. Chem. Soc.* 1969, **91**, 3845.
8. J. Y. Chen, S. H. Chen, X. H. Xu, Z. Tang, C. T. Au and R. H. Qiu, *J. Org. Chem.* 2016, **81**, 3246.
9. L. F. Niu, Y. Cai, C. Liang, X. P. Hui and P. F. Xu, *Tetrahedron* 2011, **67**, 2878.

# $^1\text{H}$ NMR and $^{13}\text{C}$ NMR spectra of carbonimidodithioate

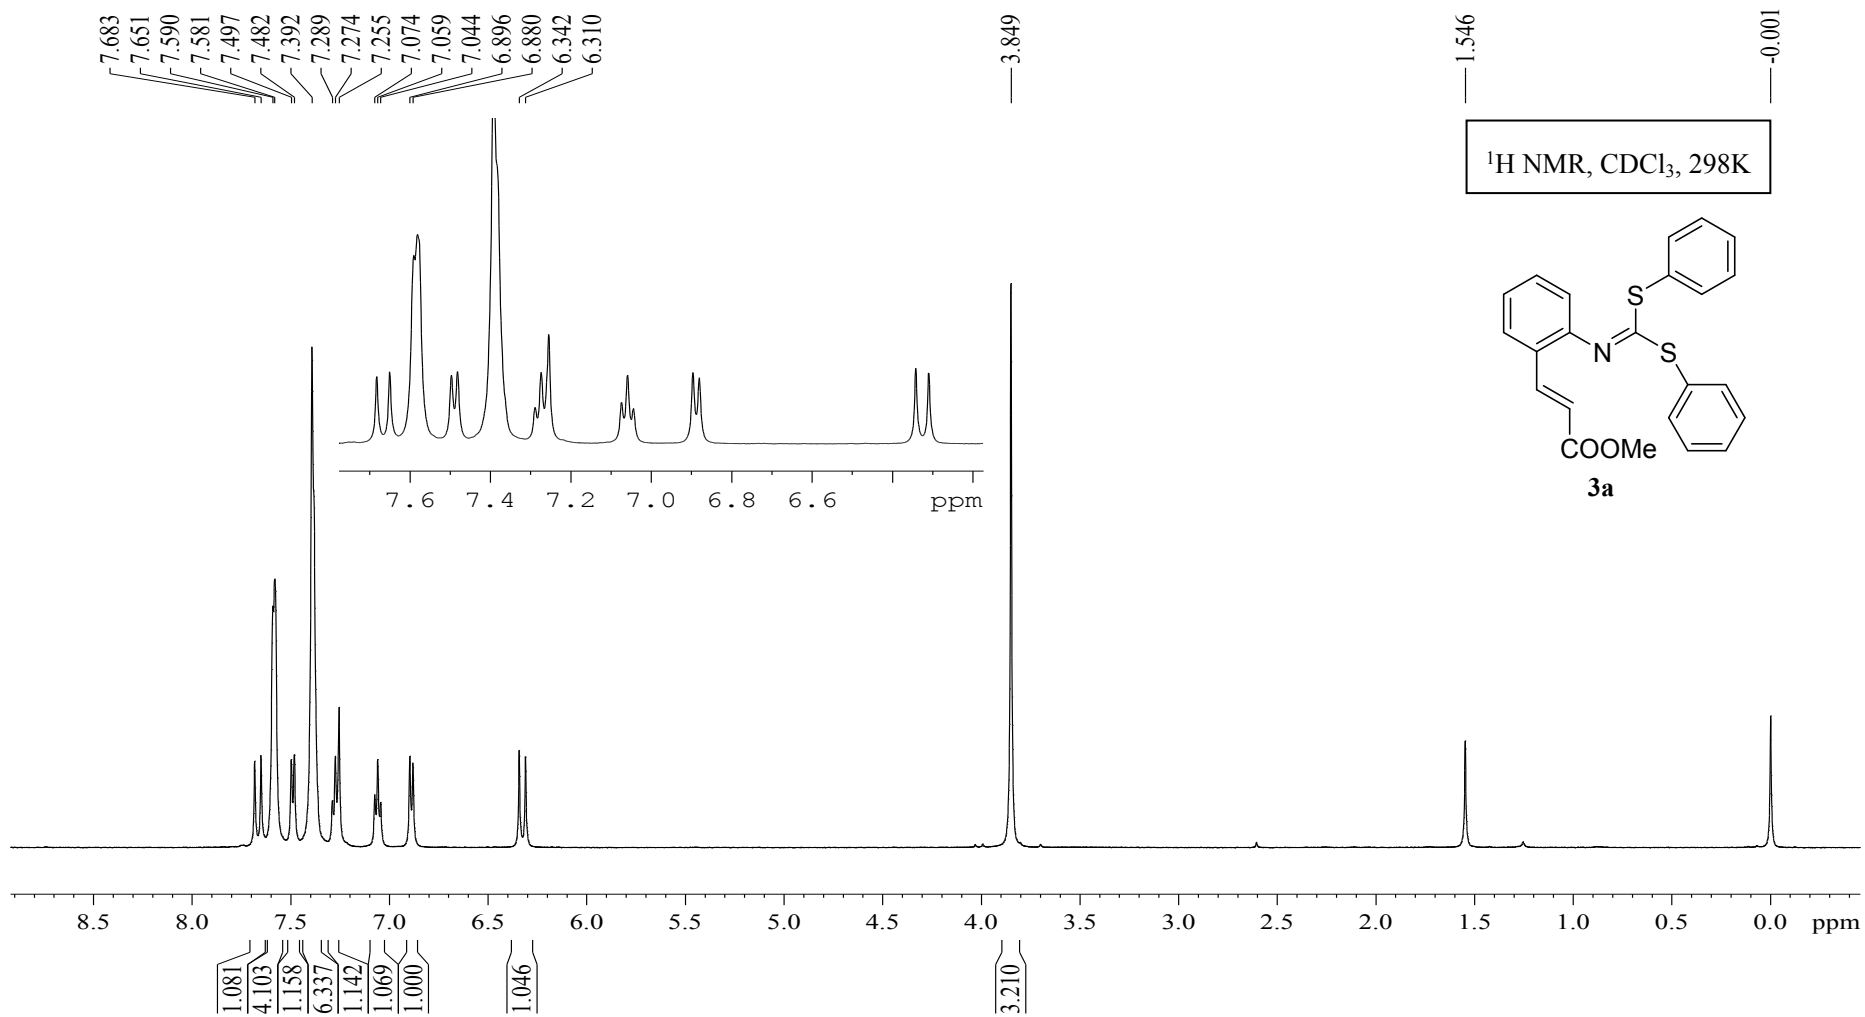

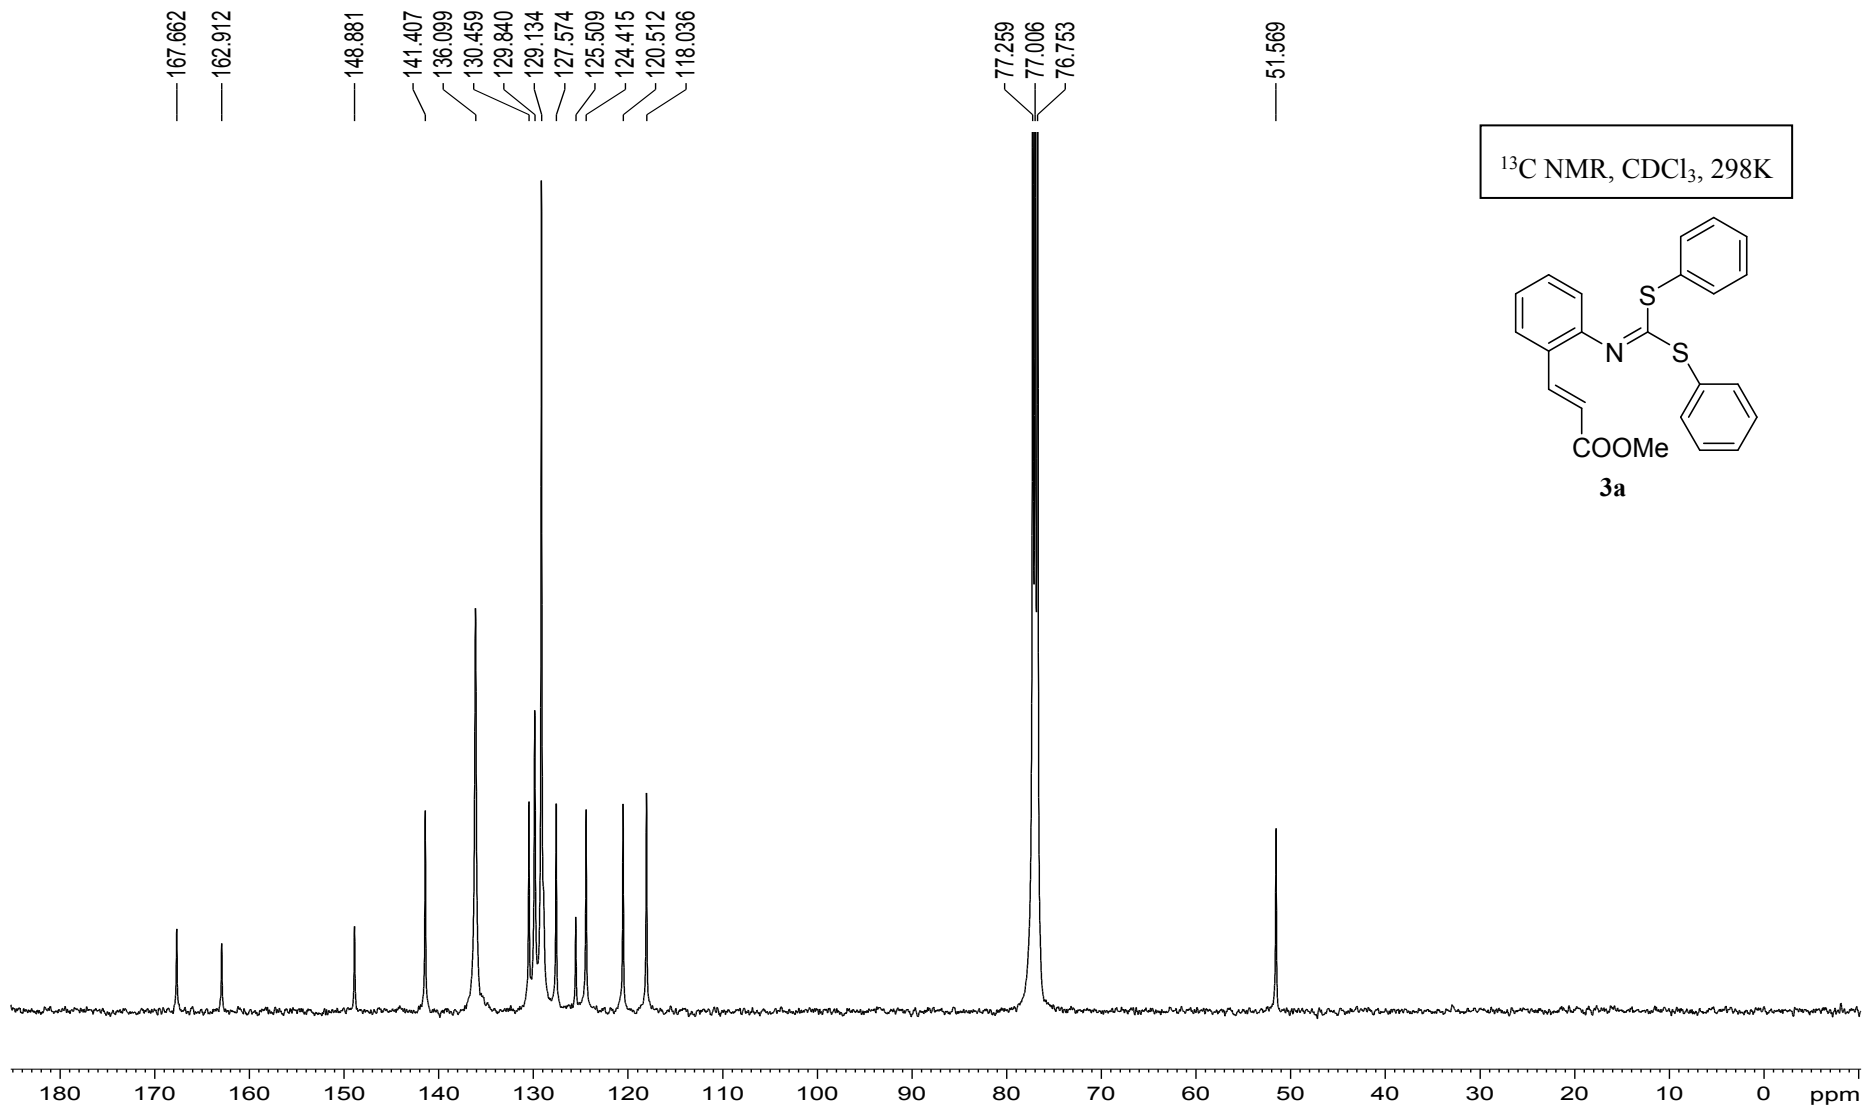

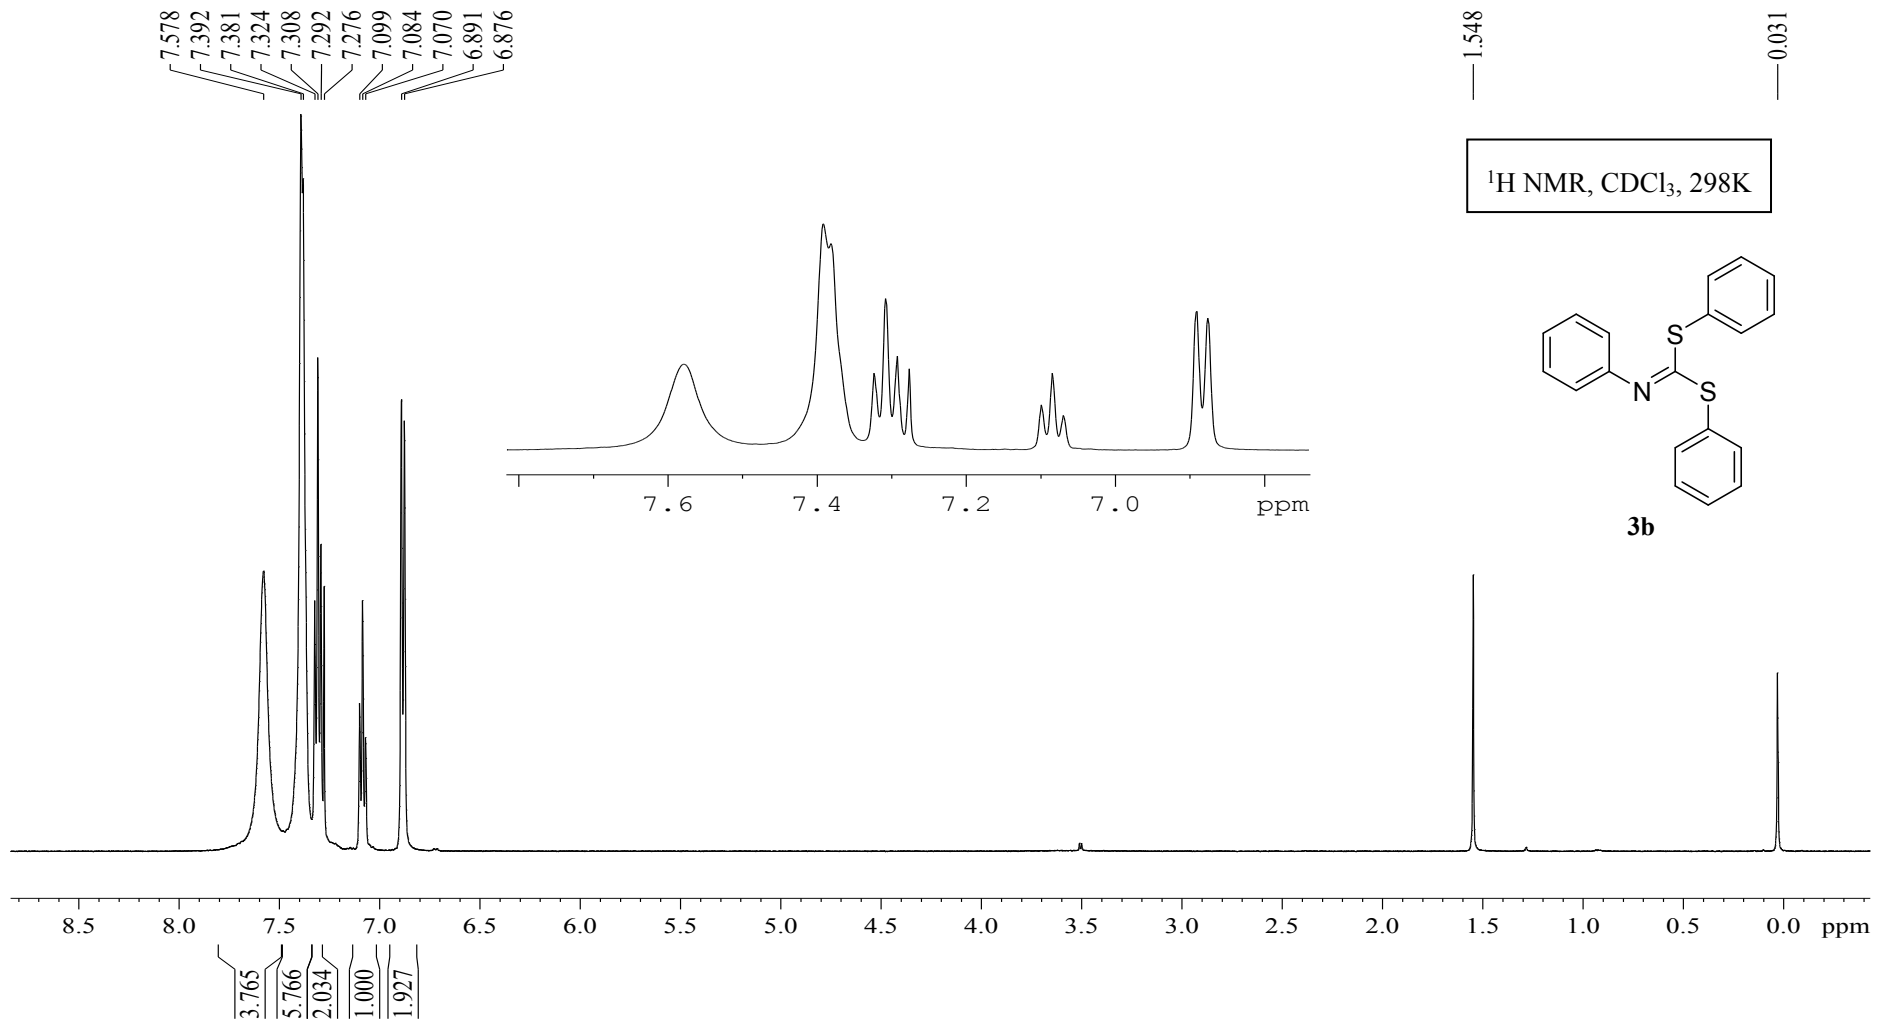

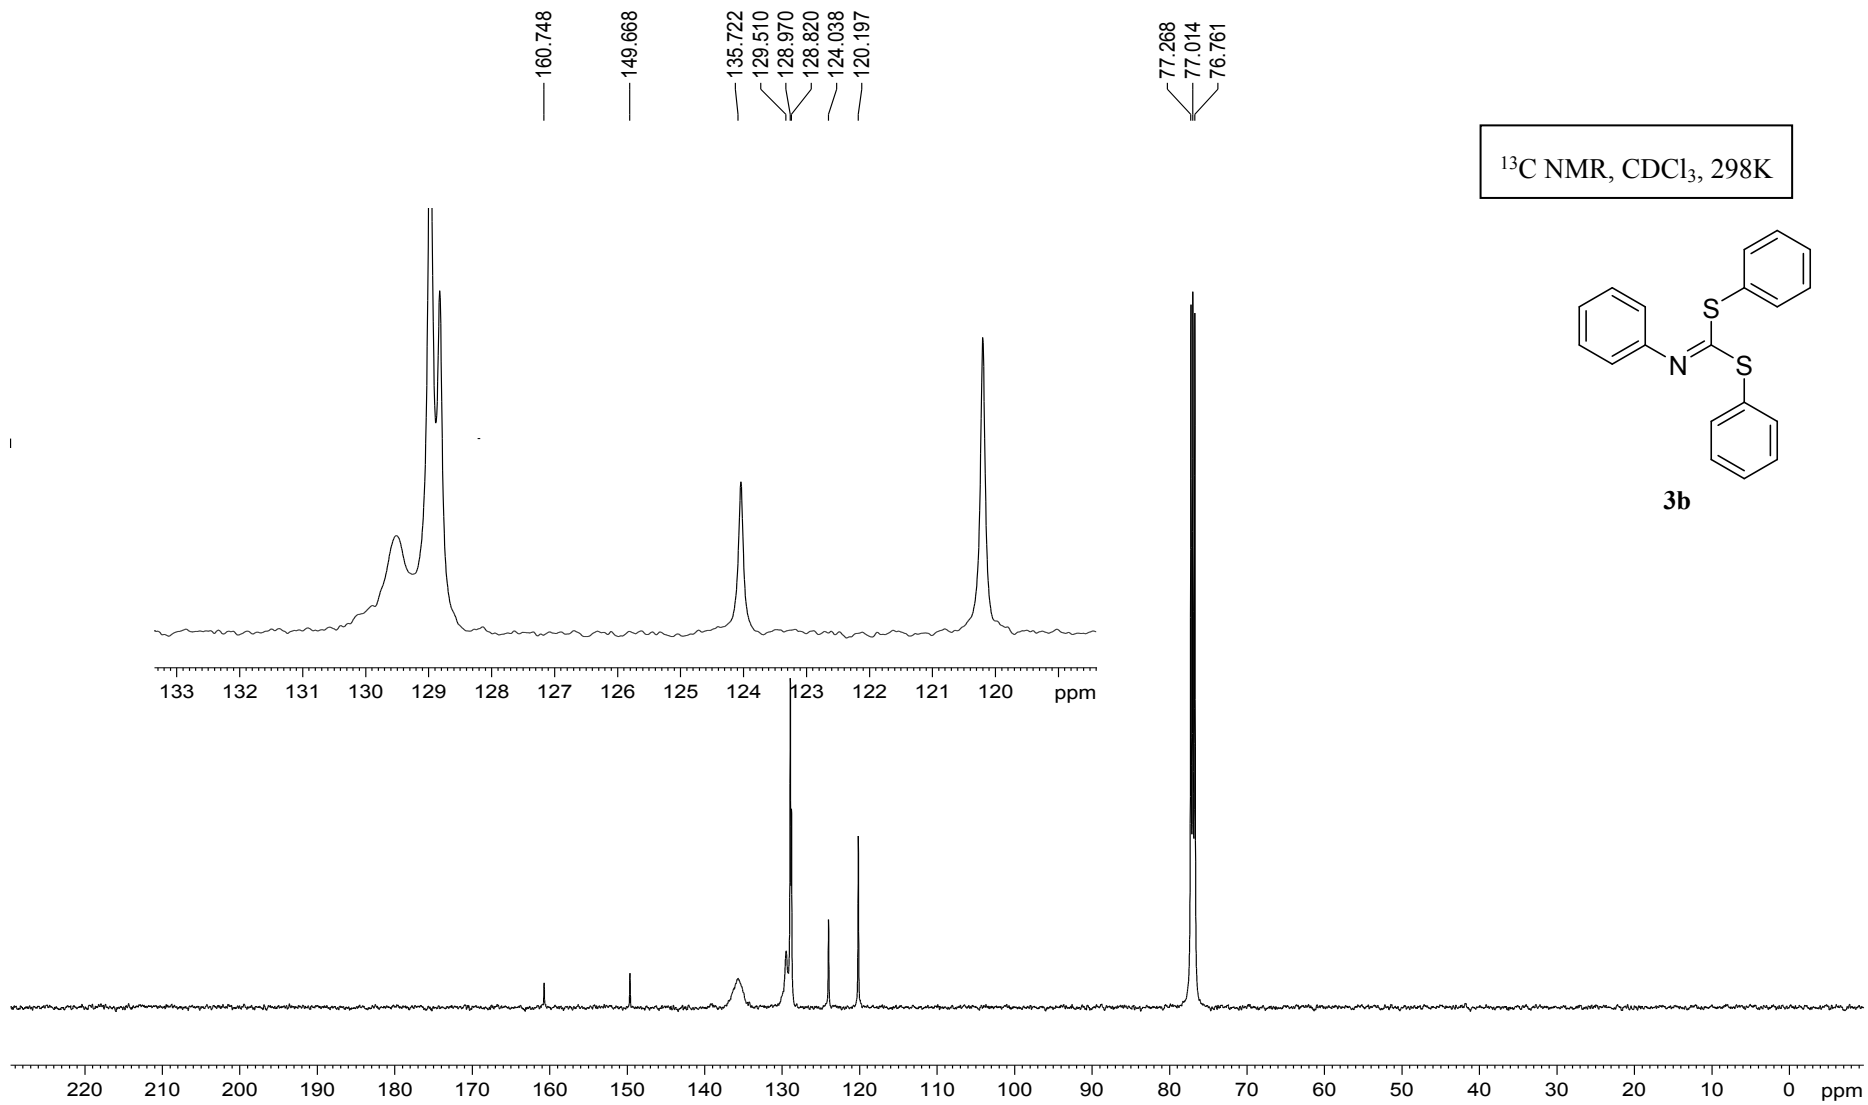

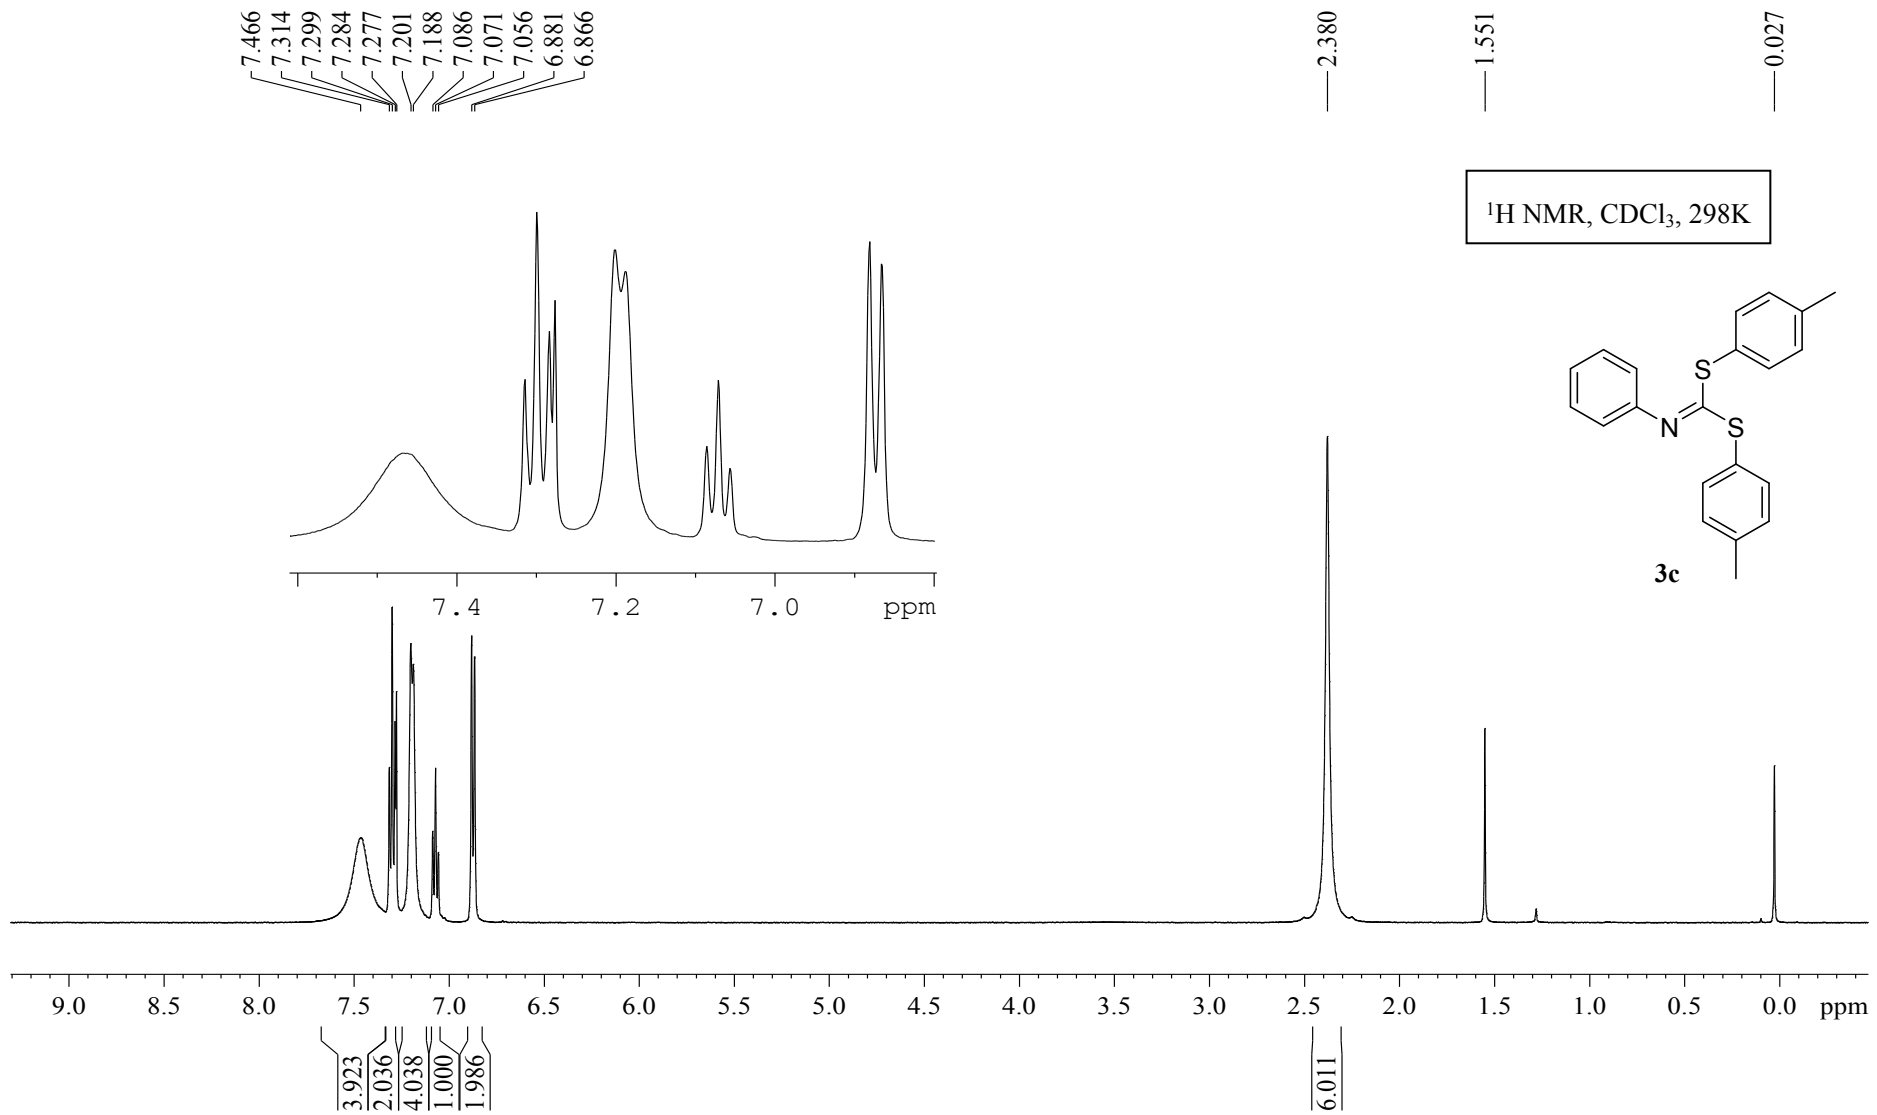

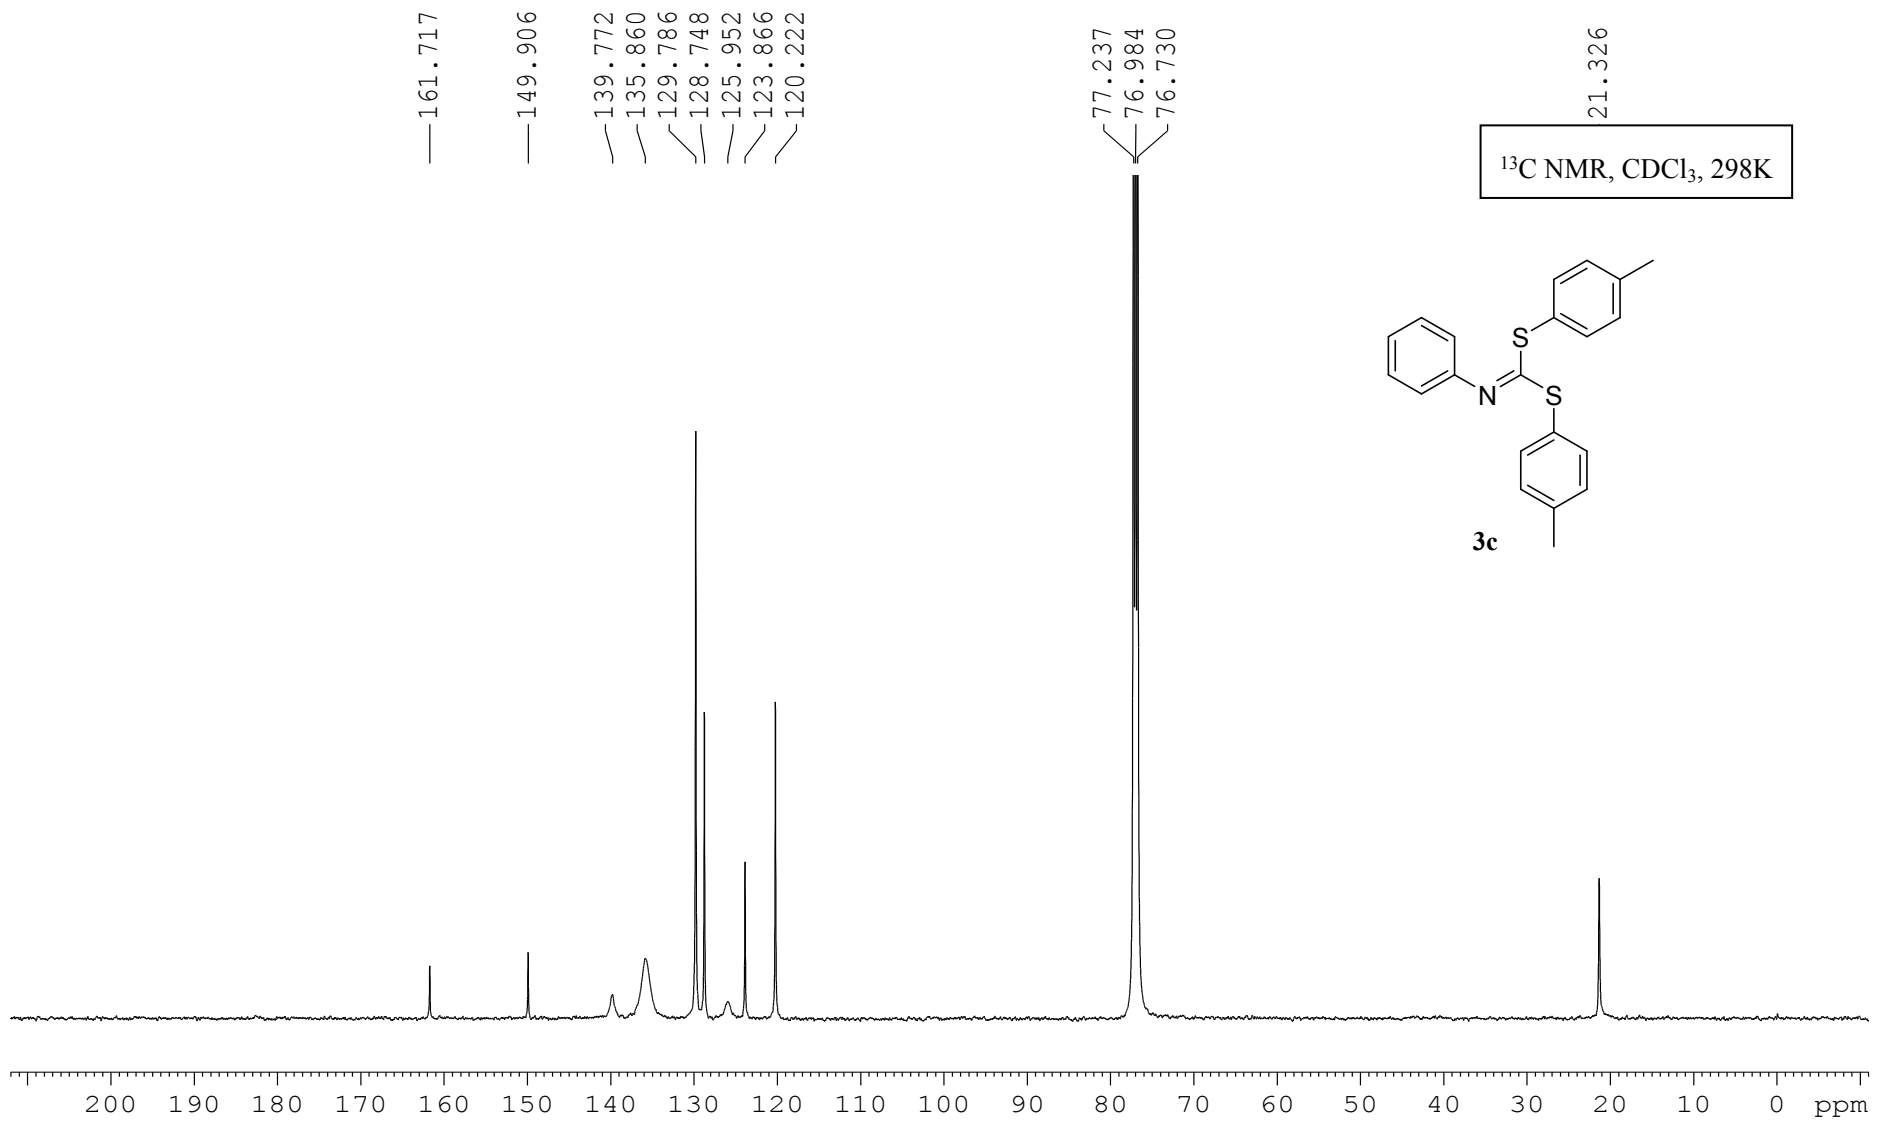

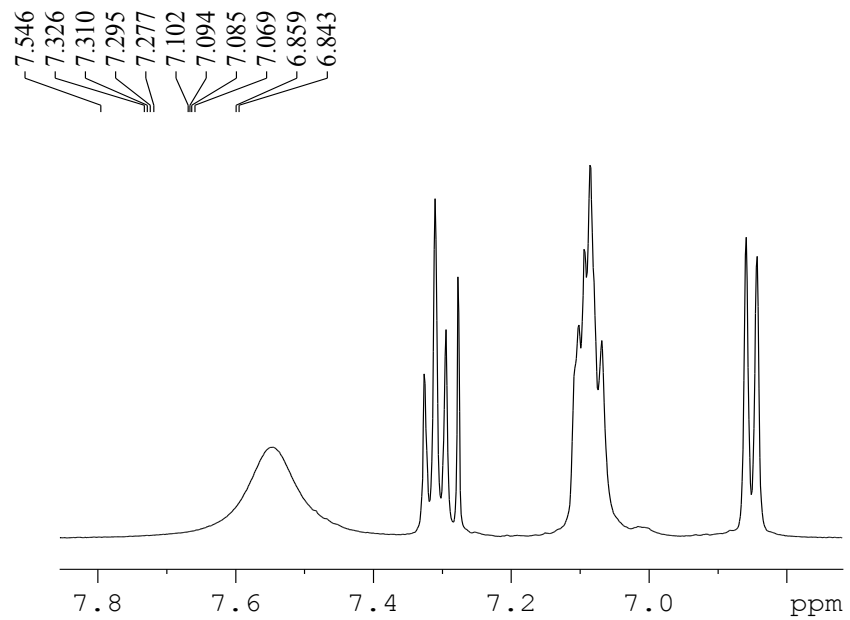

1.570  
0.023

<sup>1</sup>H NMR, CDCl<sub>3</sub>, 298K

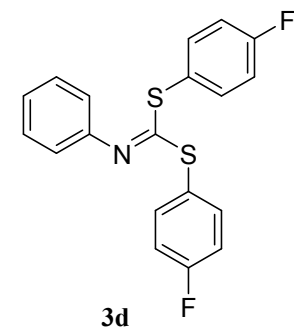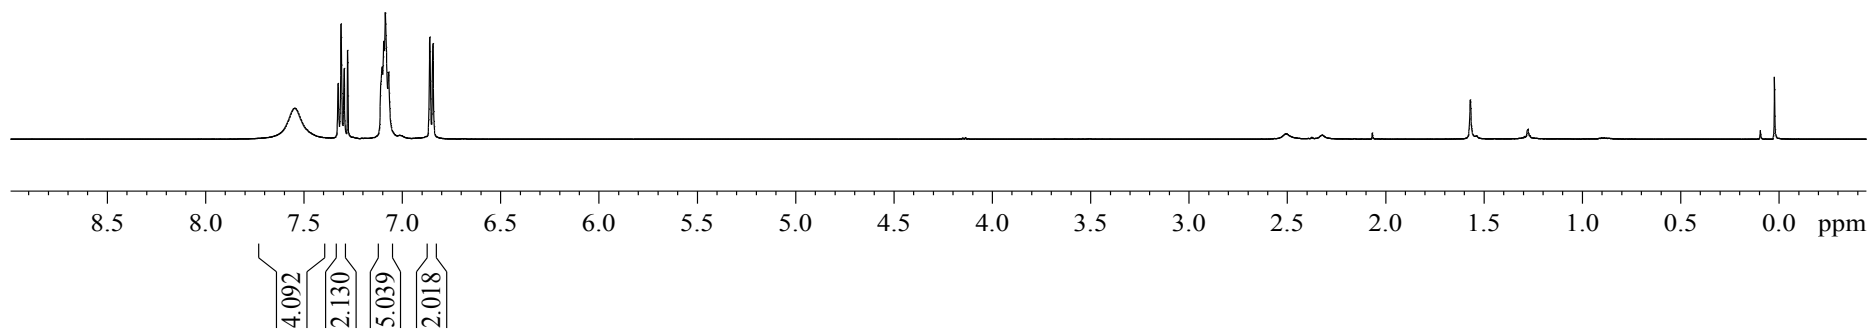



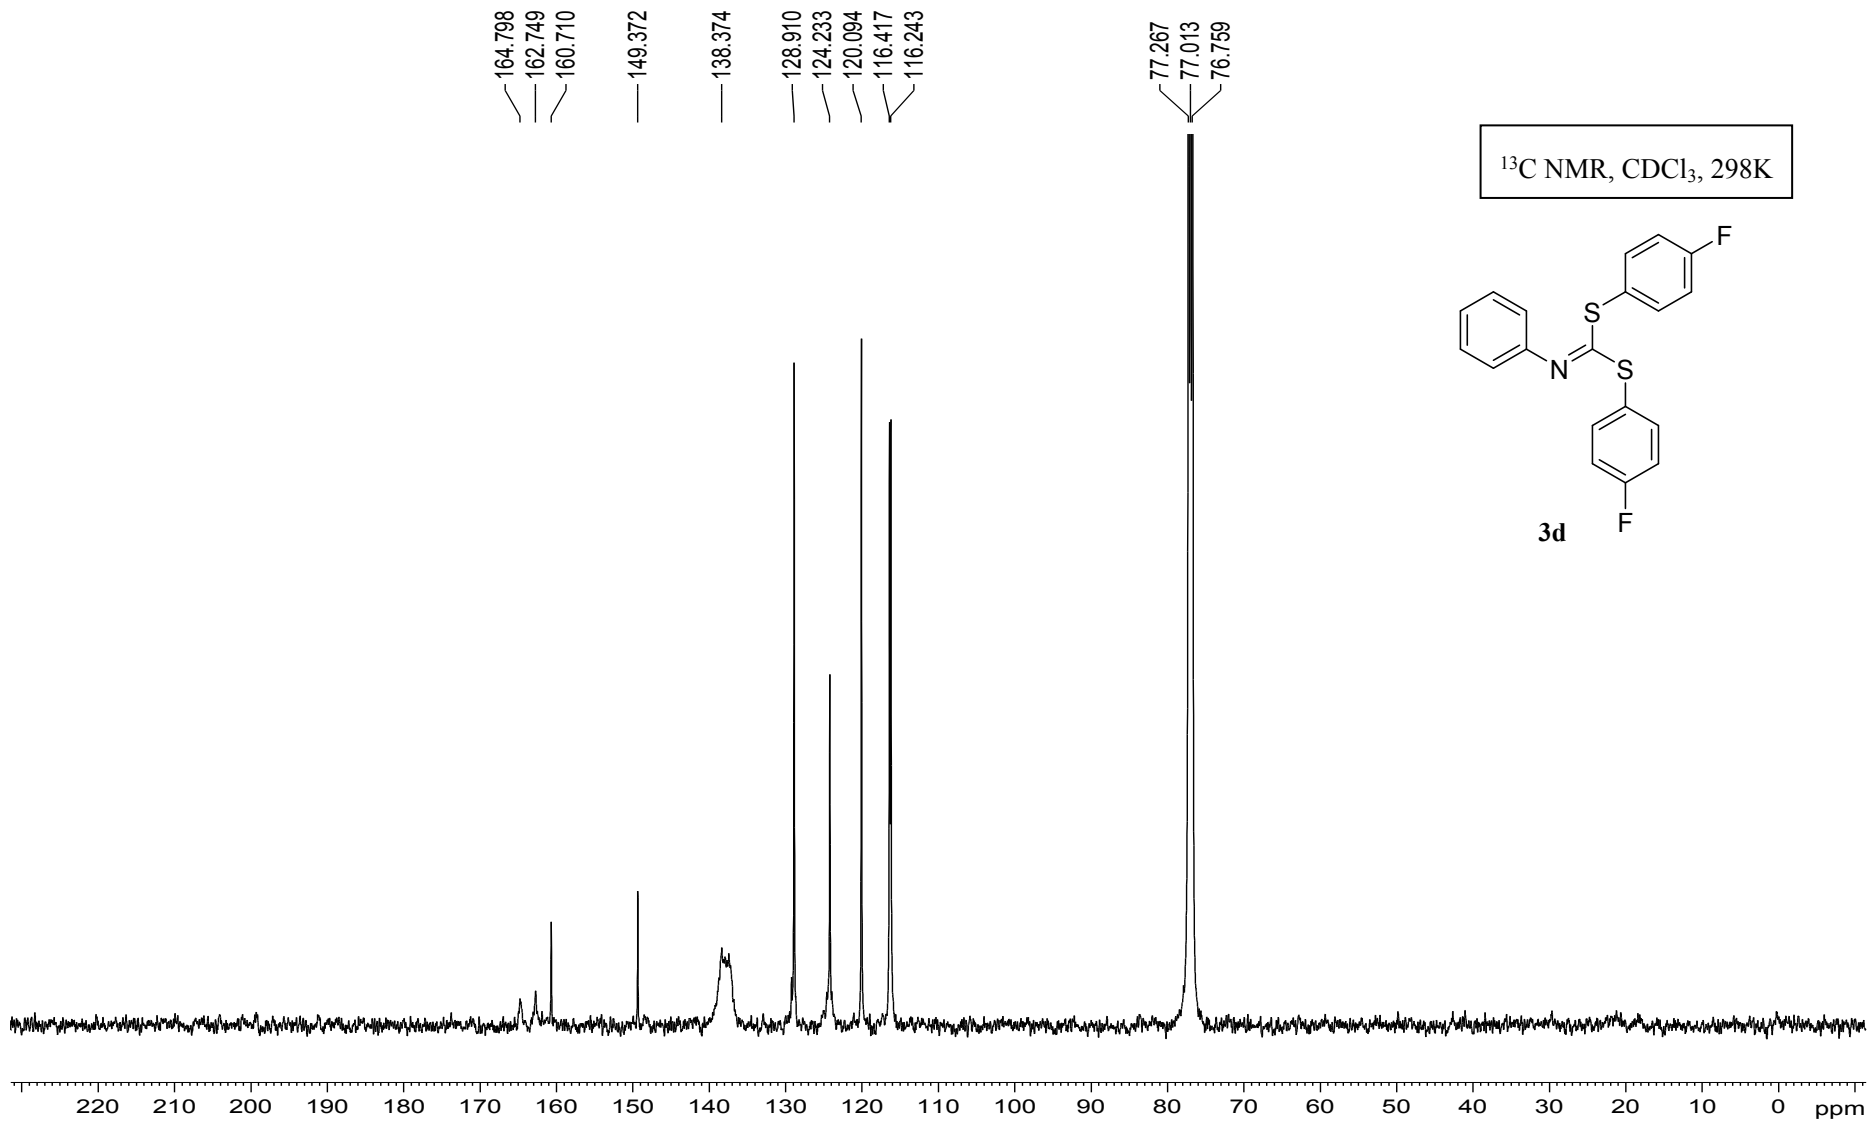

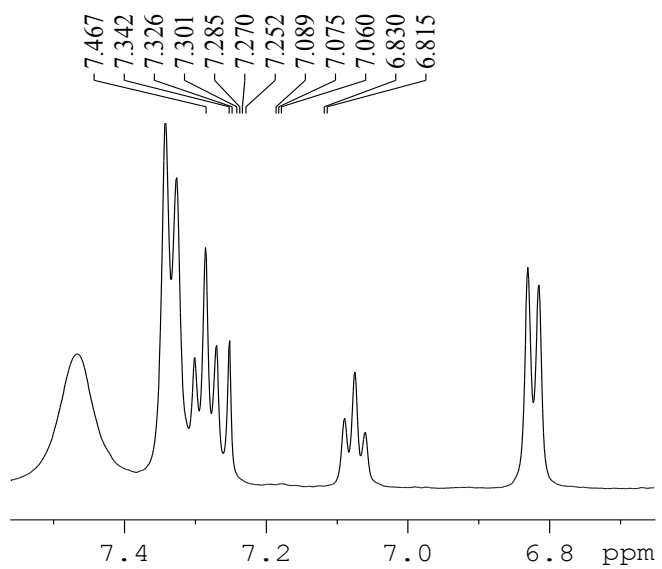

1.534  
-0.000  
**<sup>1</sup>H NMR, CDCl<sub>3</sub>, 298K**

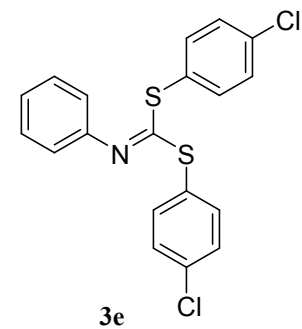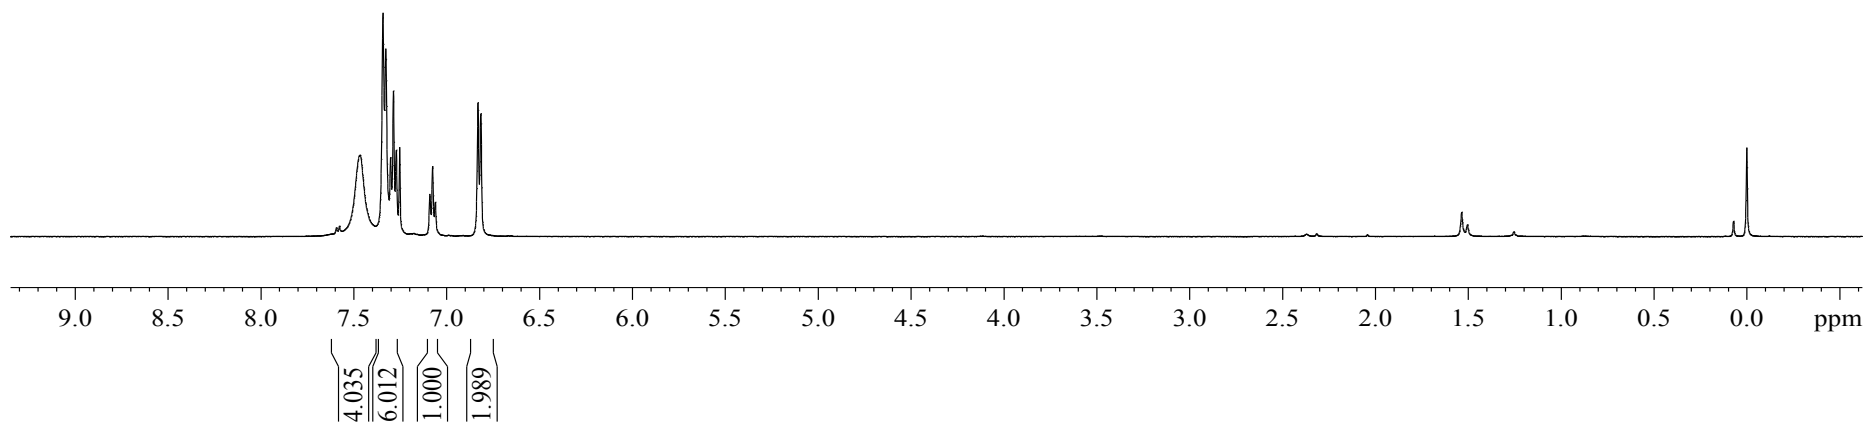

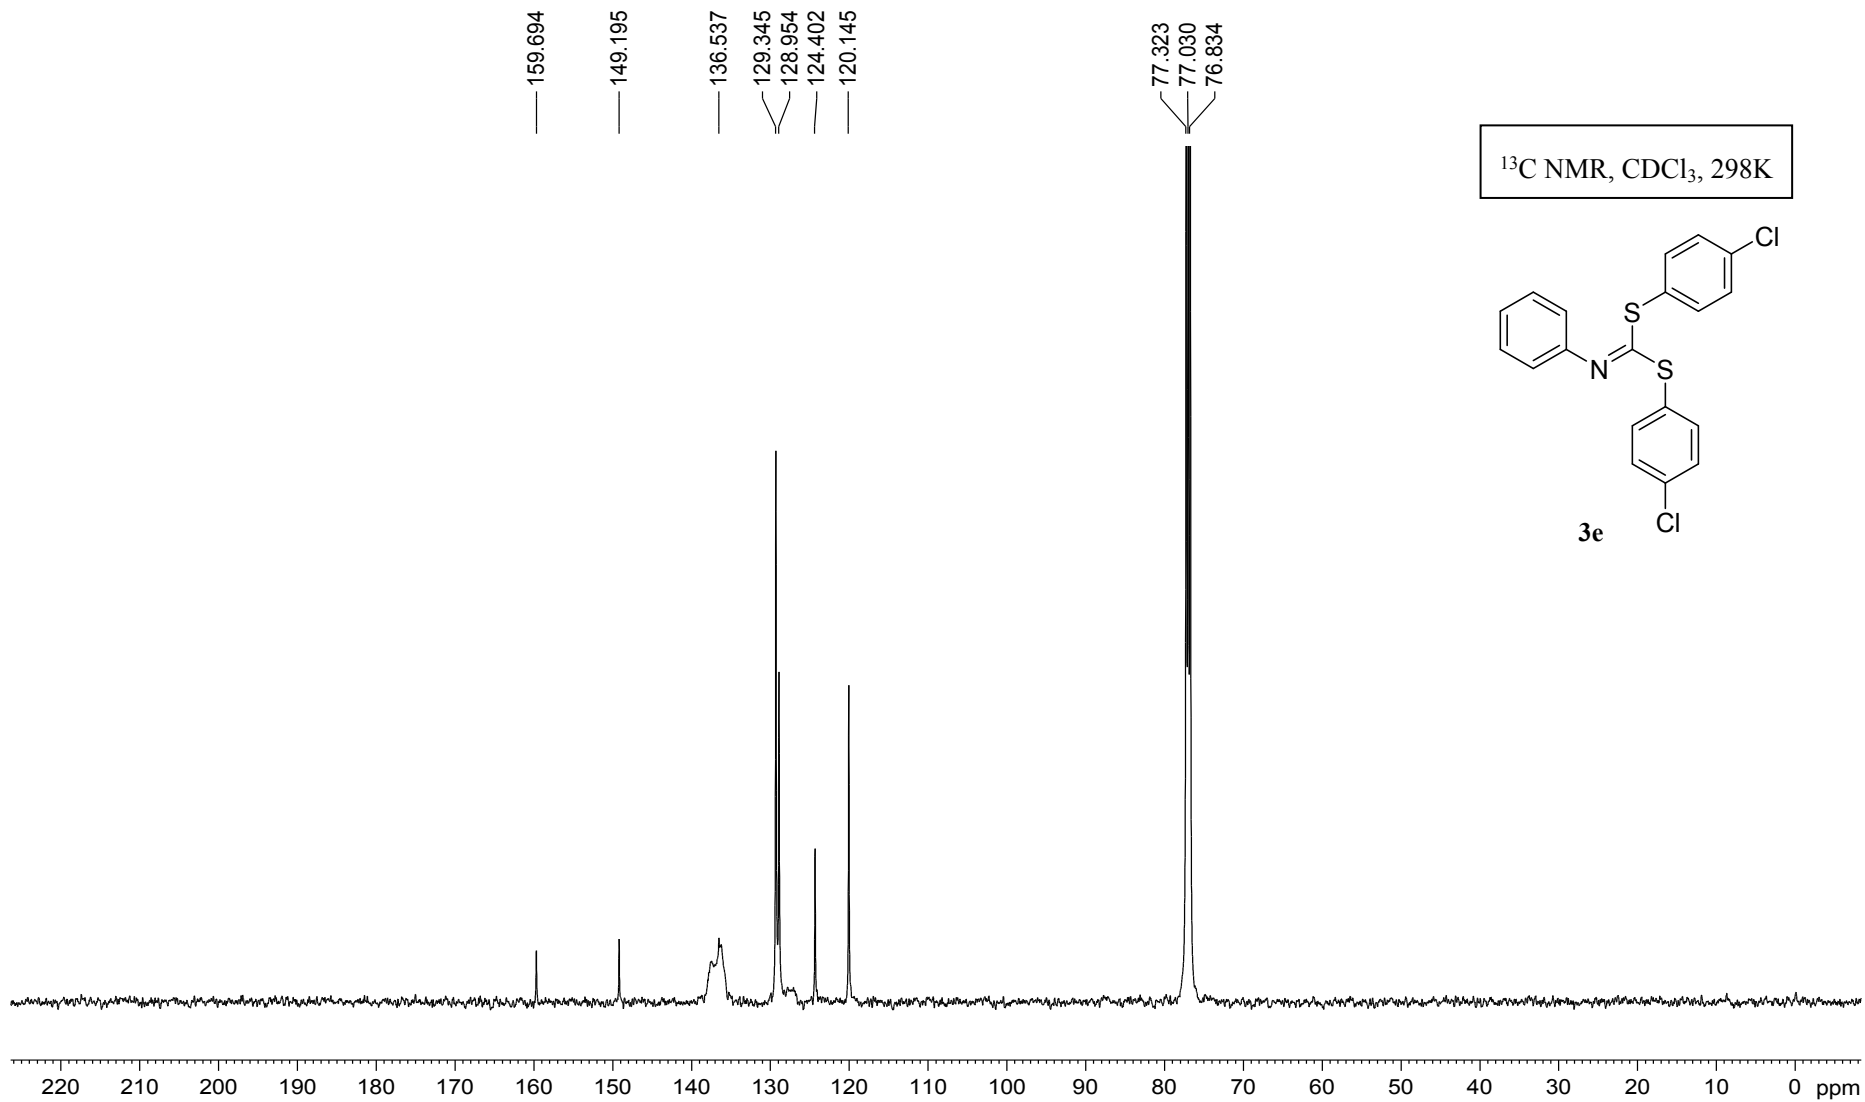

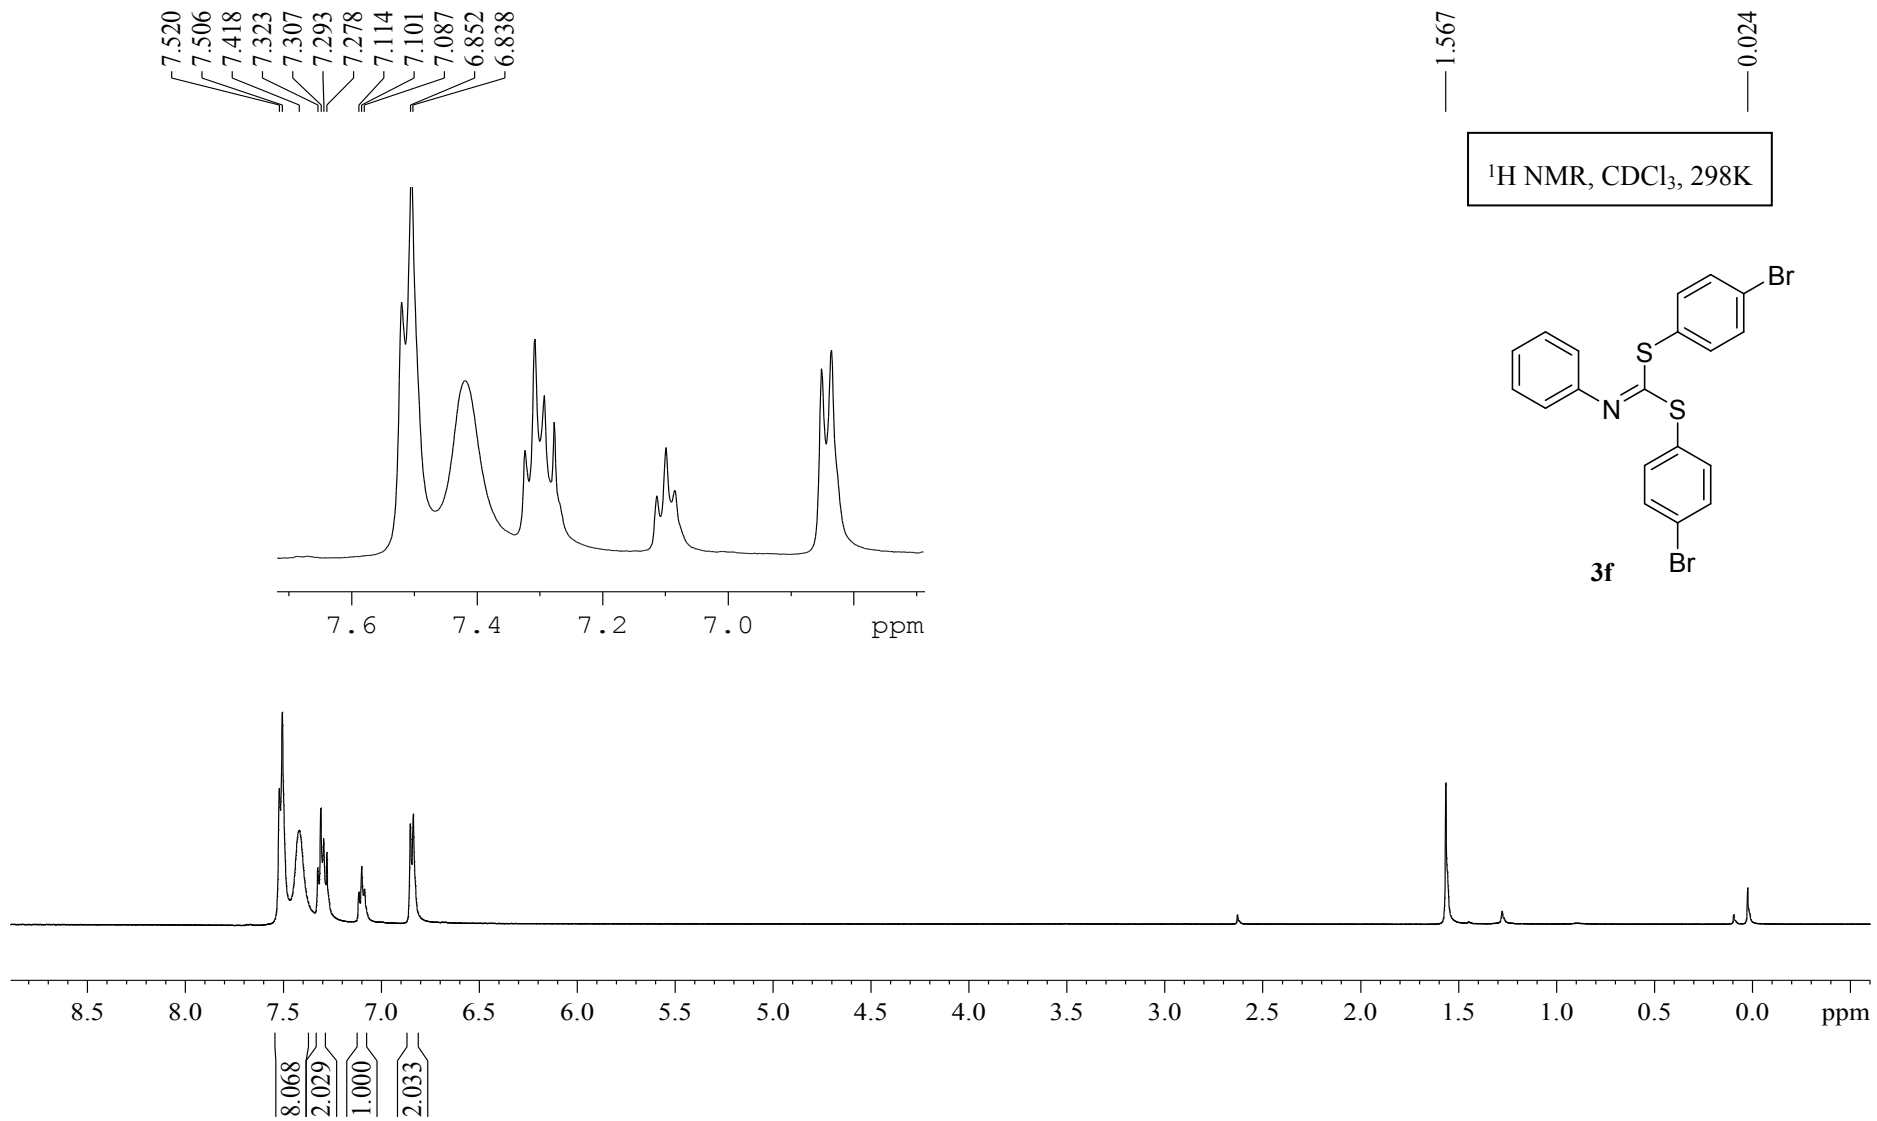

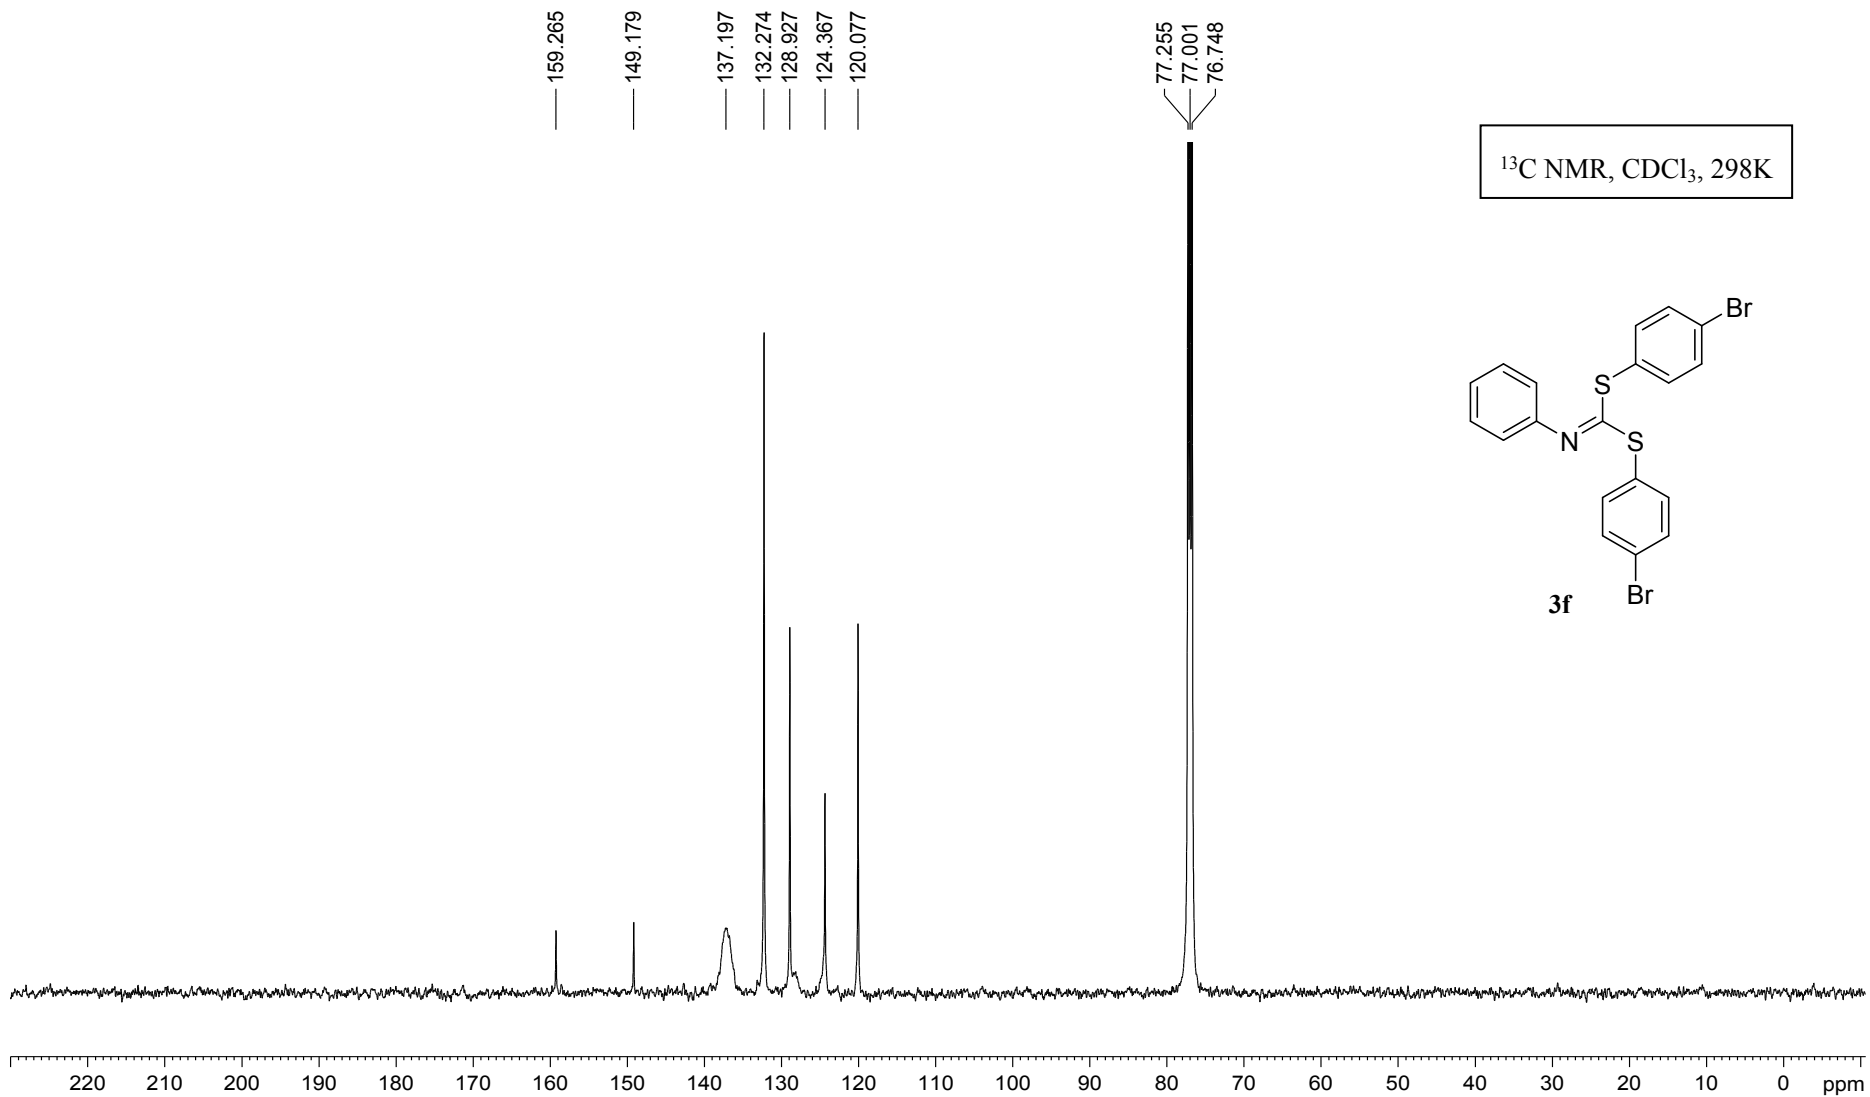

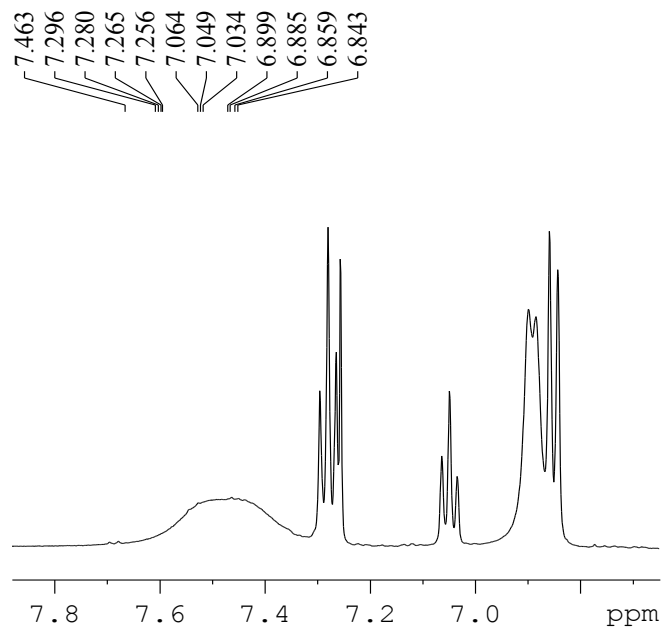

1.555  
0.001

$^1\text{H NMR, CDCl}_3, 298\text{K}$

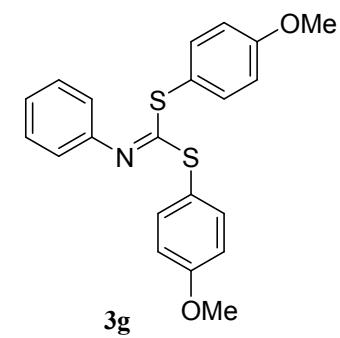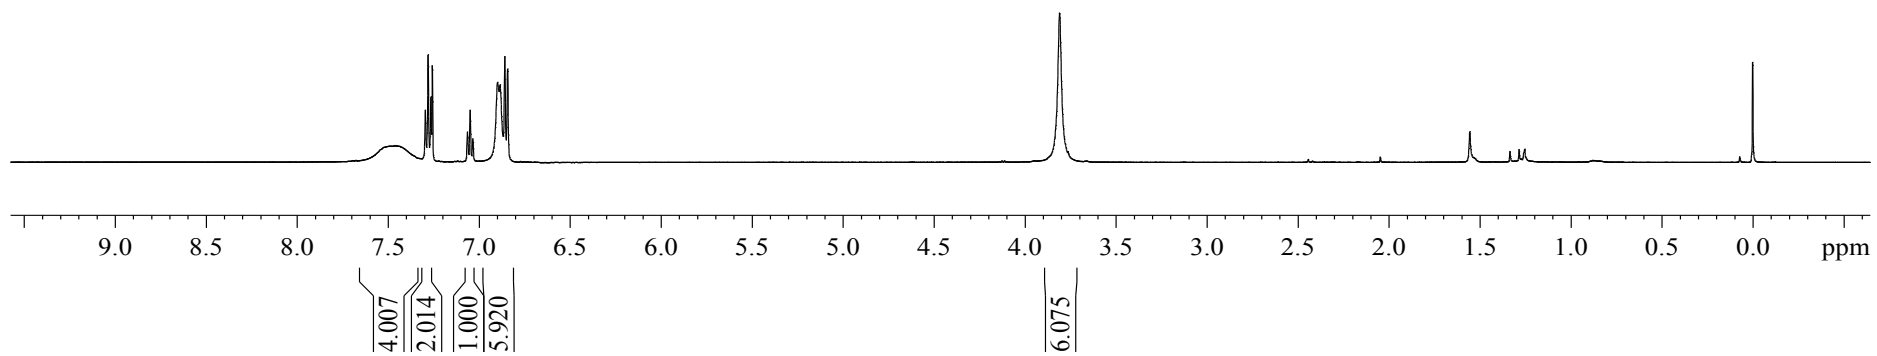

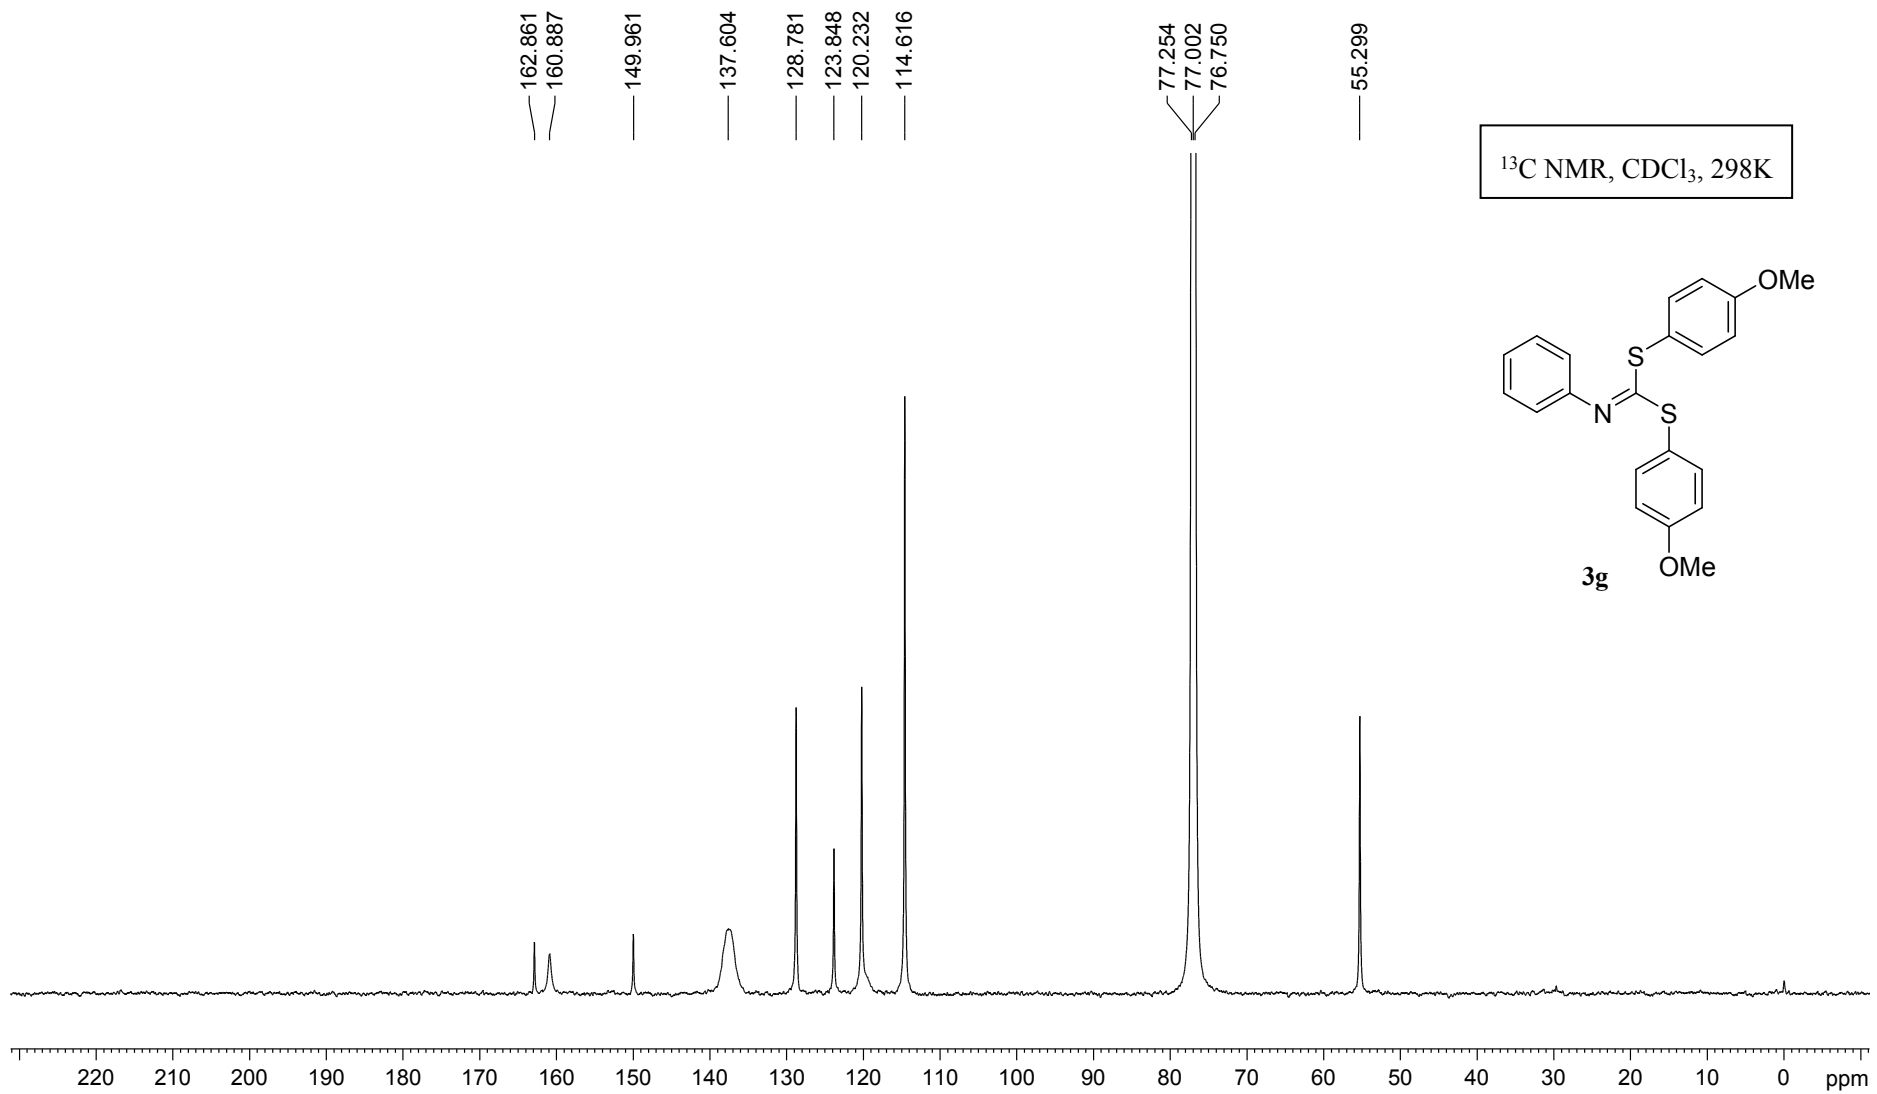

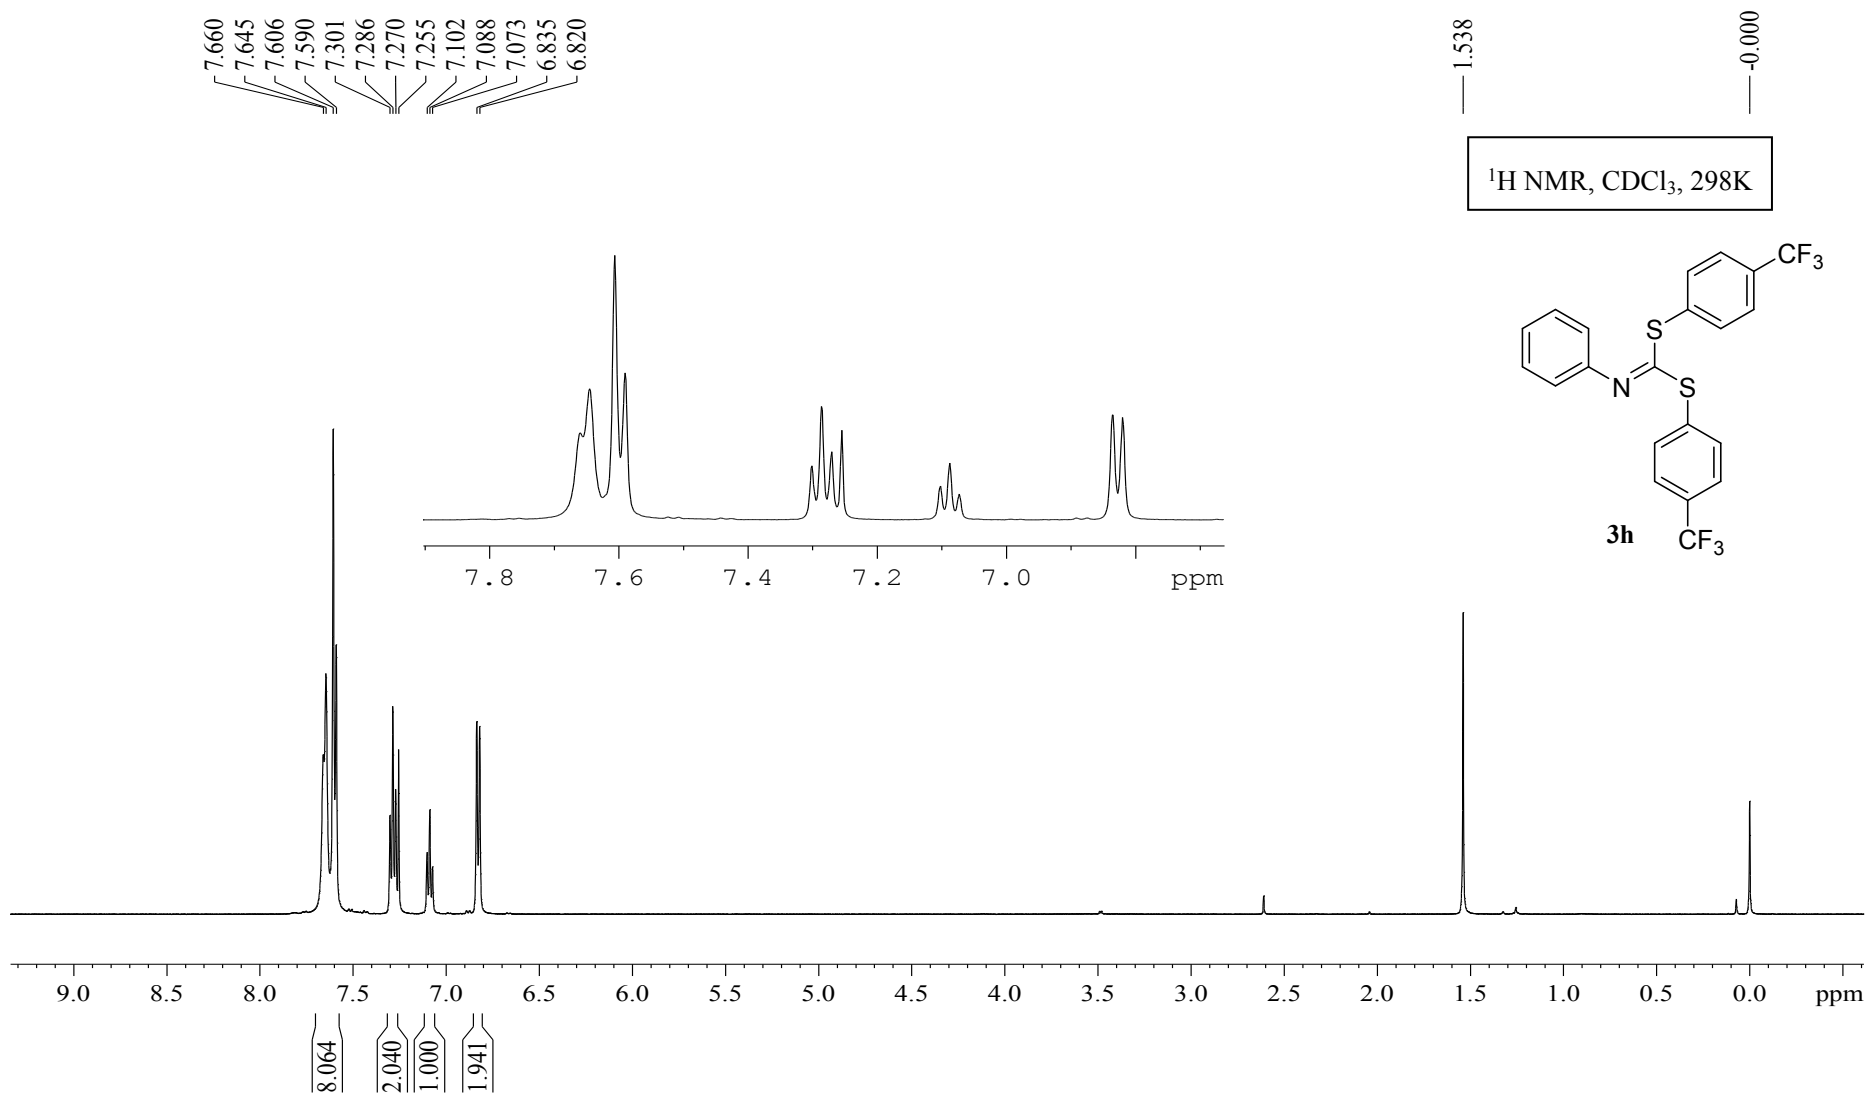



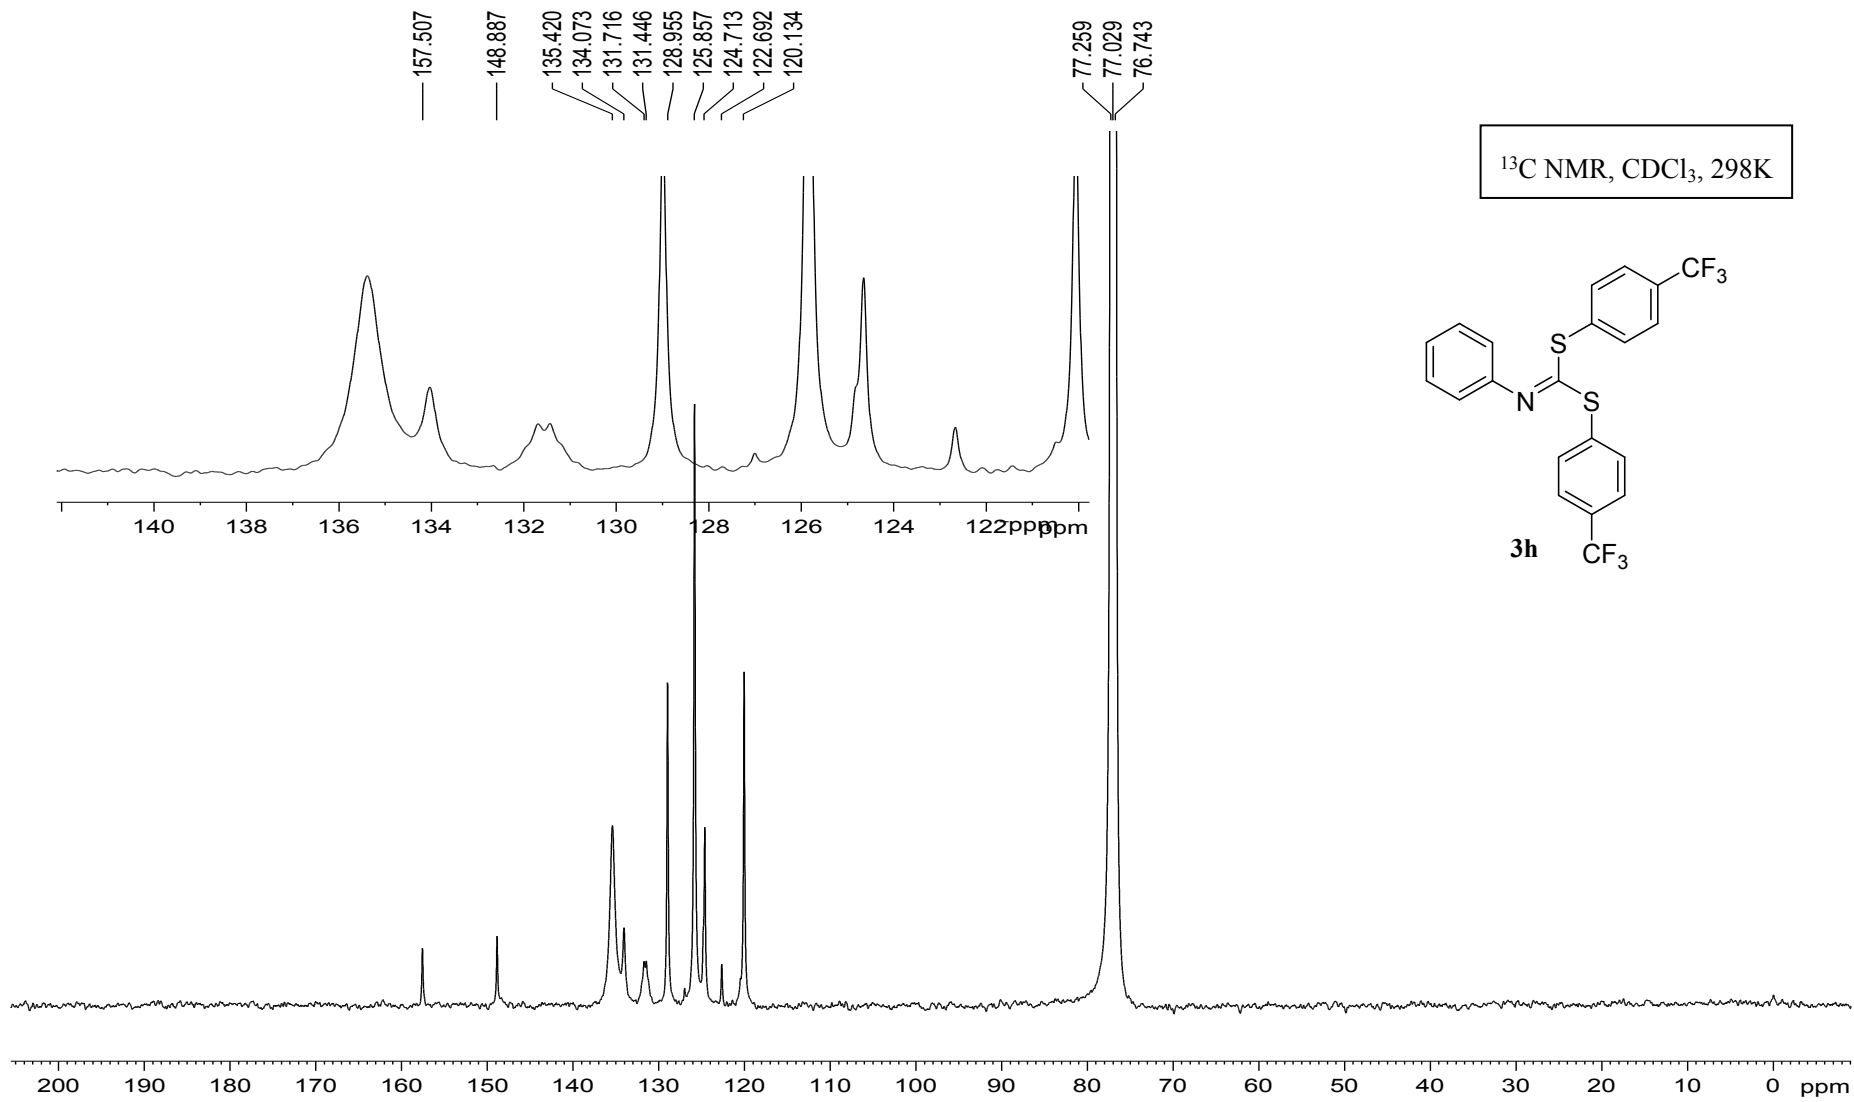

8.014  
7.997  
7.614  
7.604  
7.300  
7.284  
7.269  
7.258  
7.095  
7.080  
7.066  
6.849  
6.833

3.915

1.598

-0.001

<sup>1</sup>H NMR, CDCl<sub>3</sub>, 298K

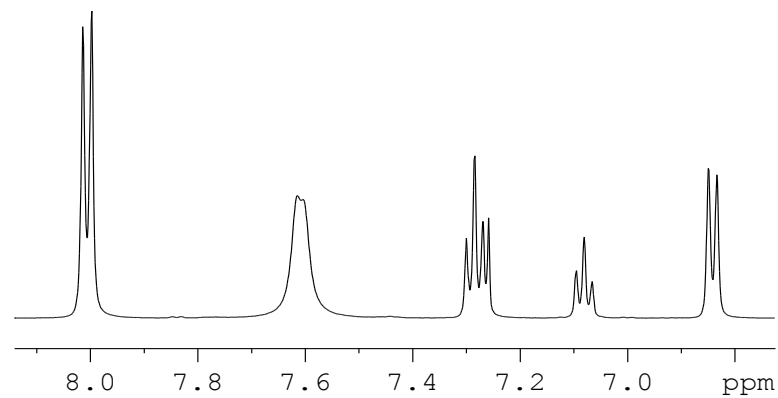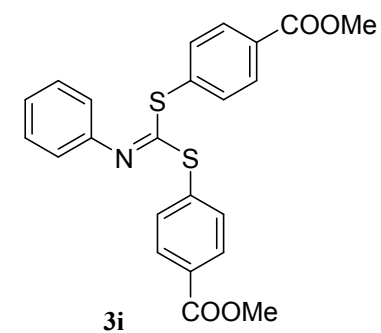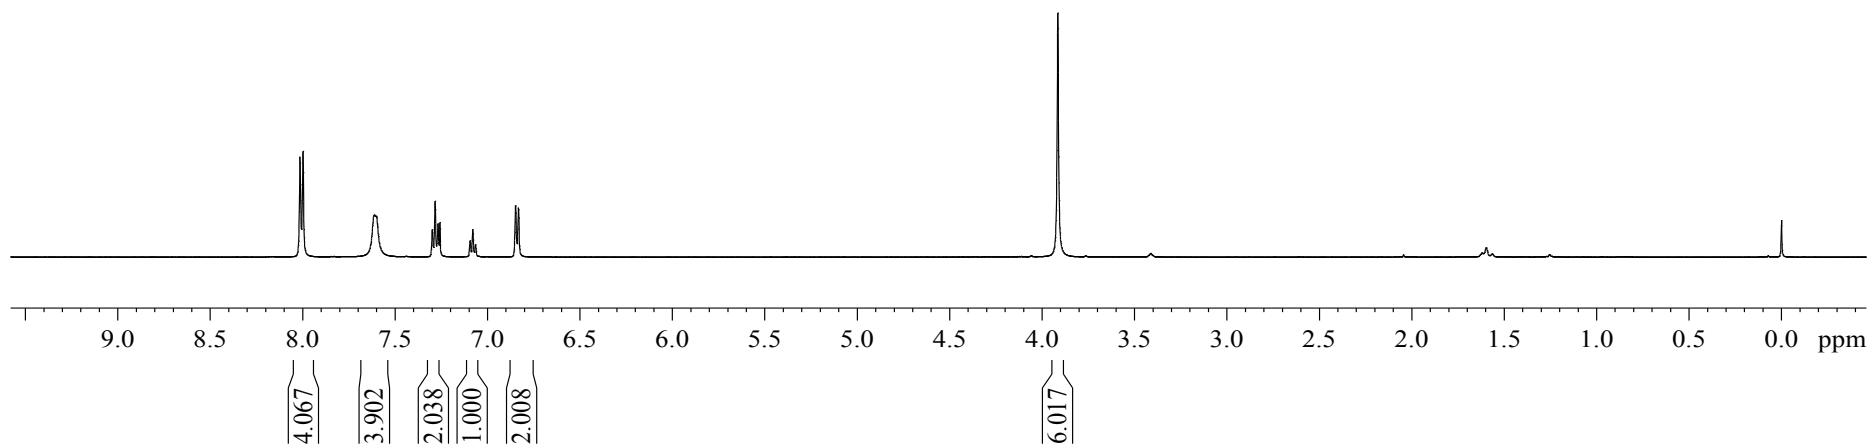

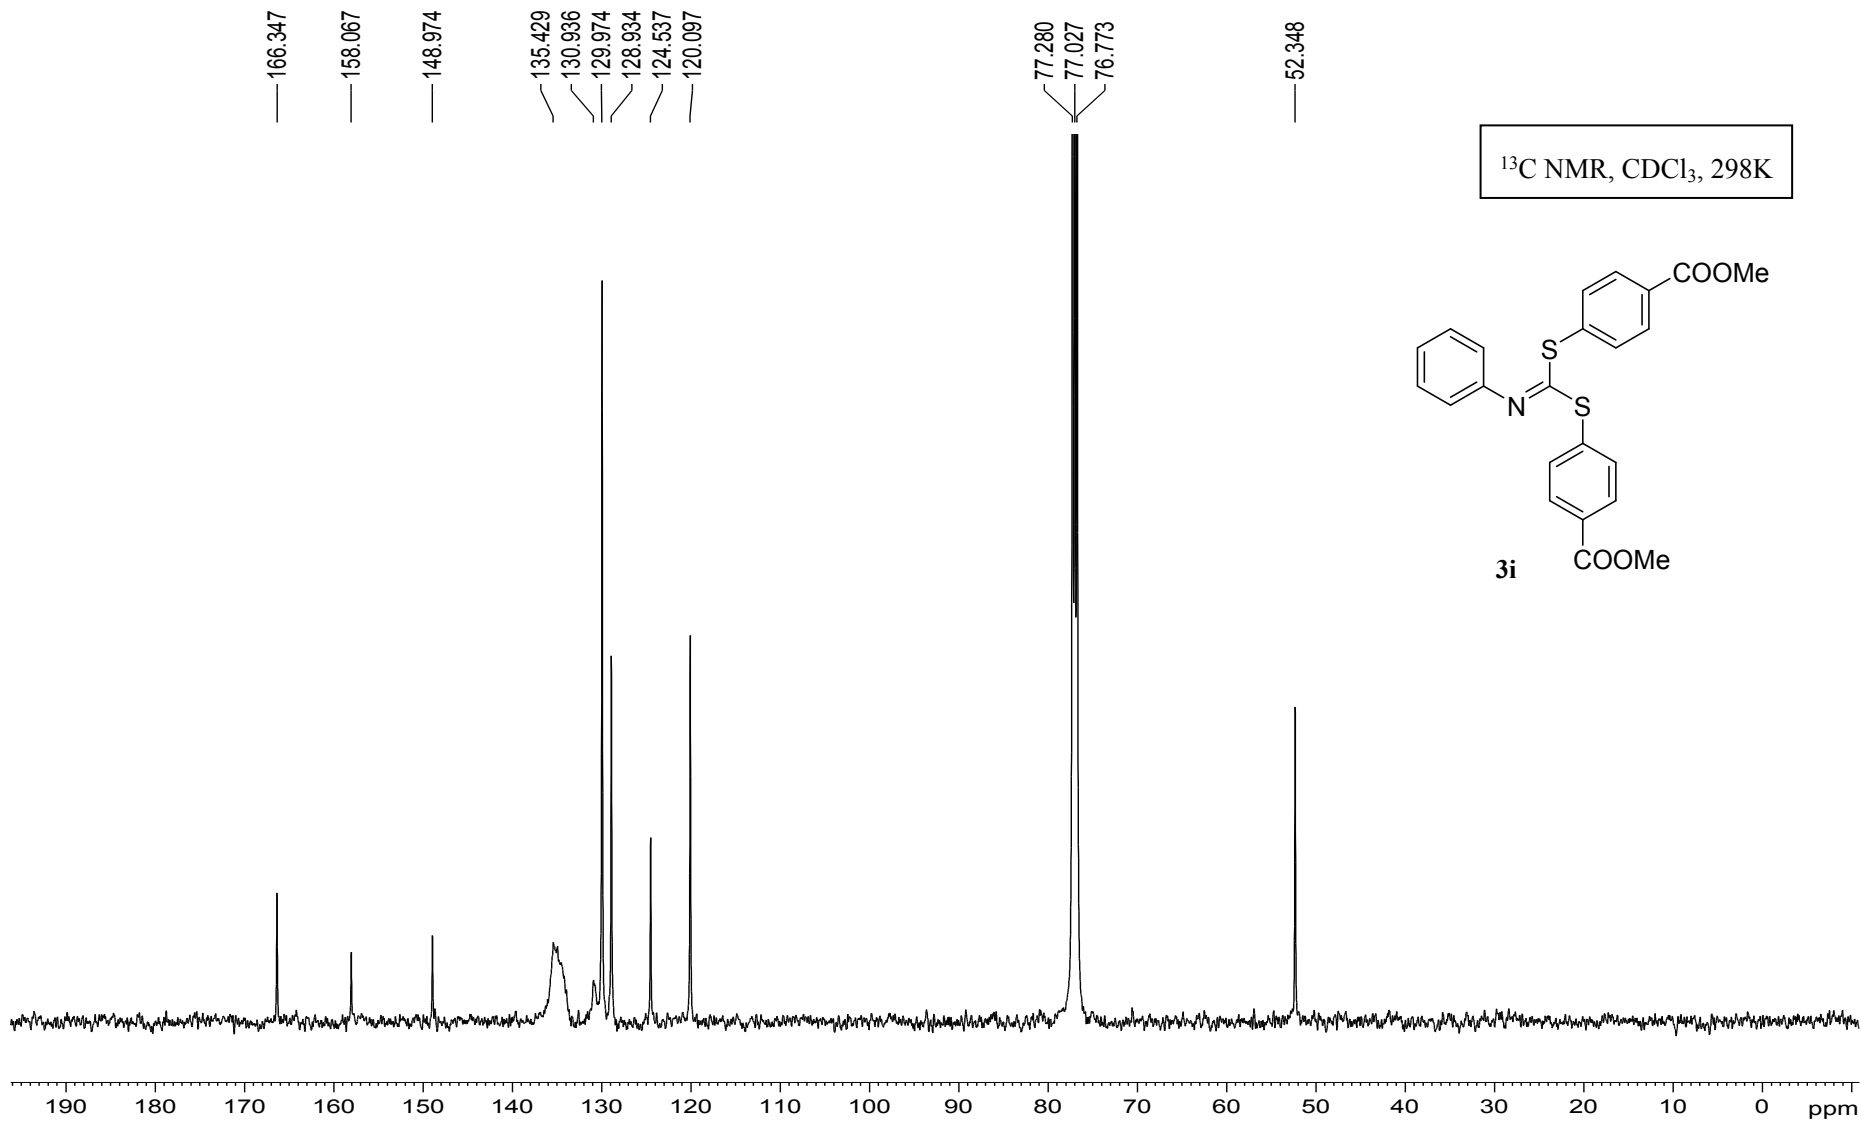

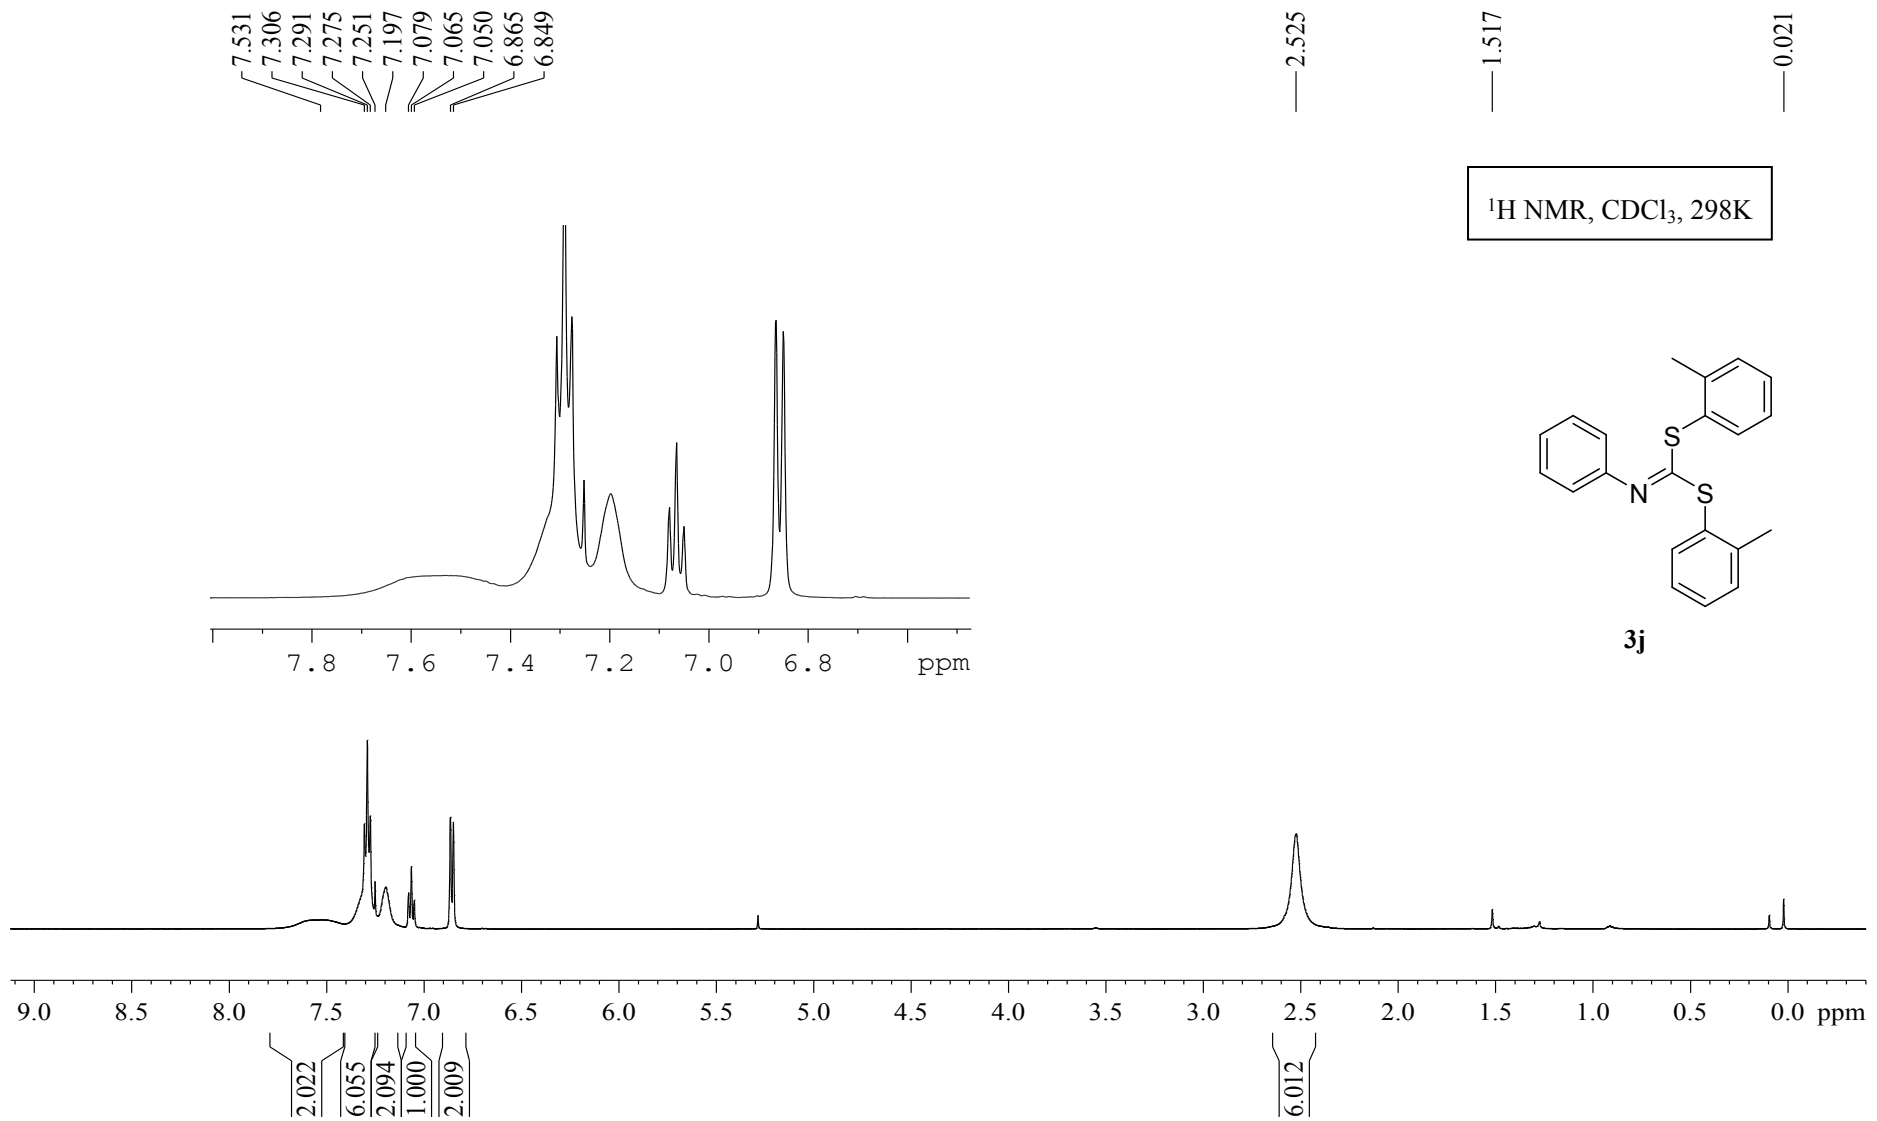

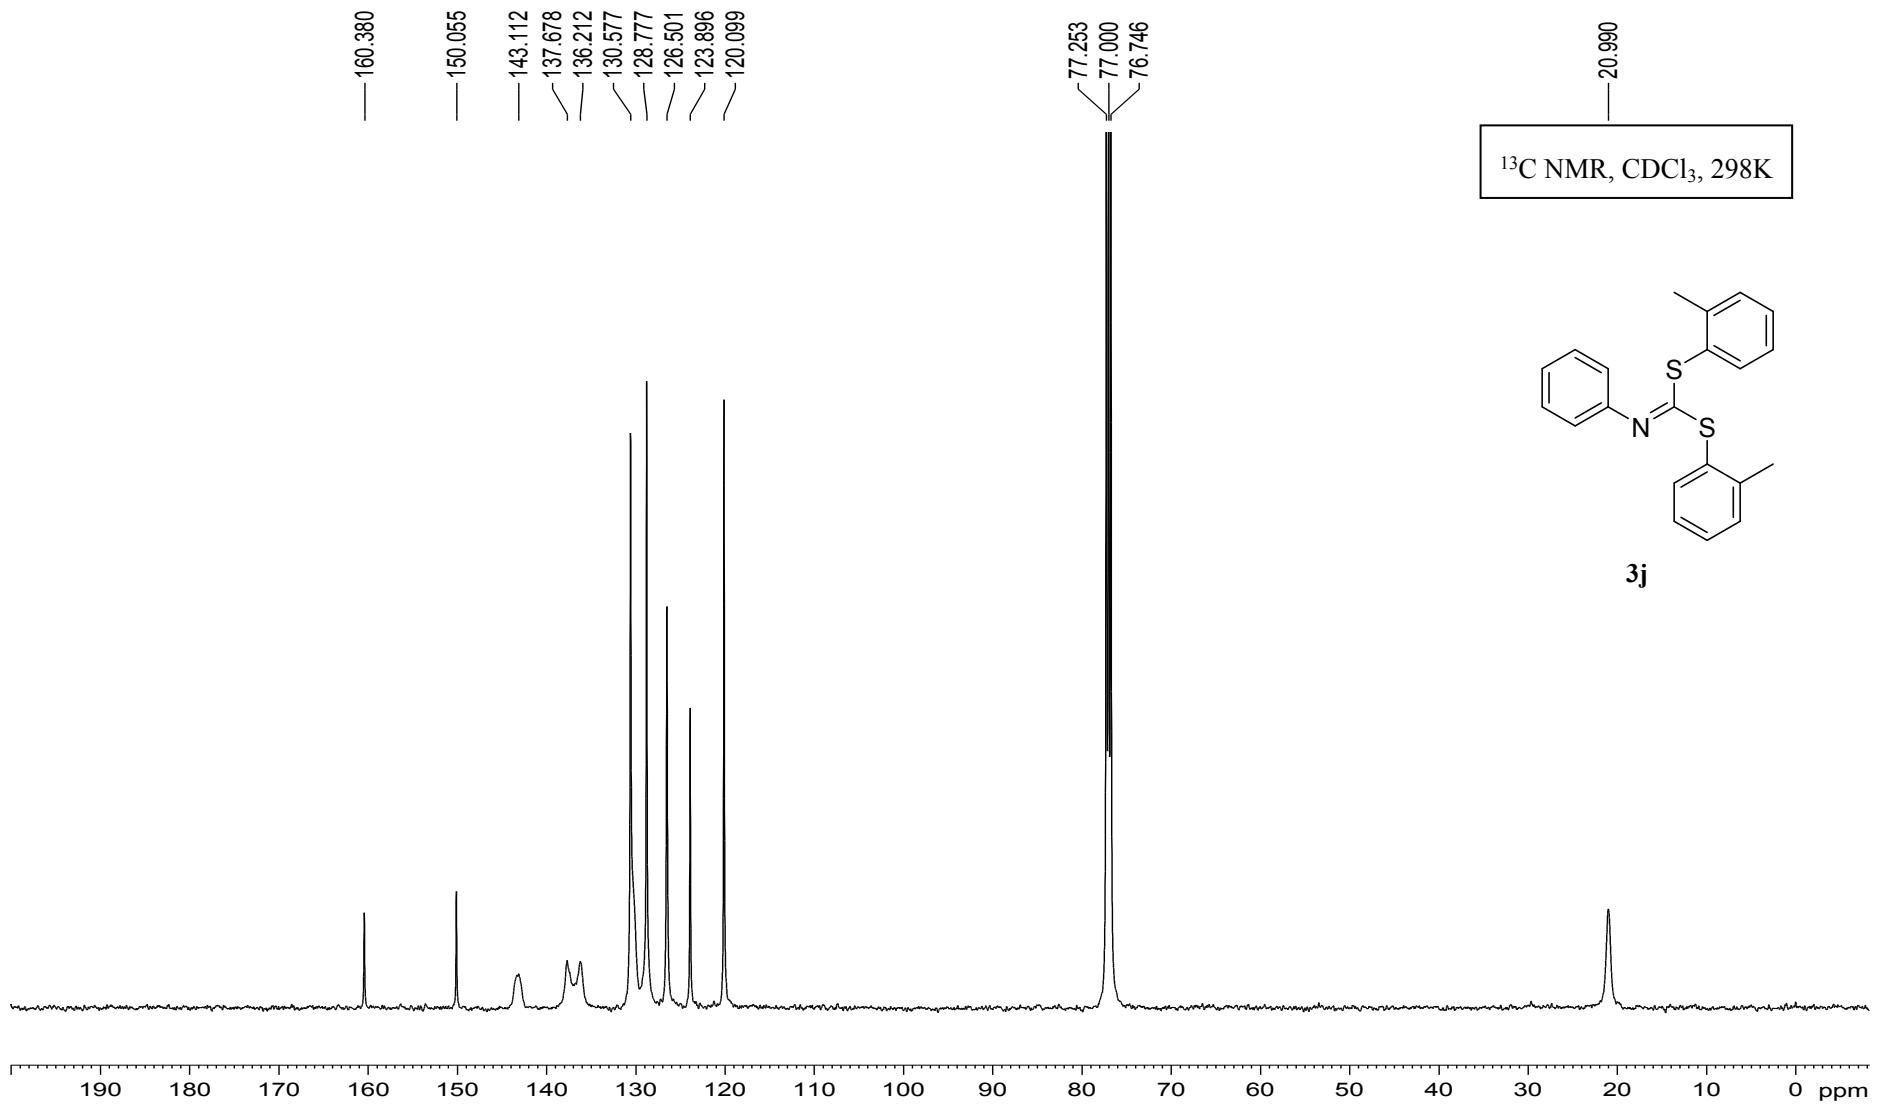

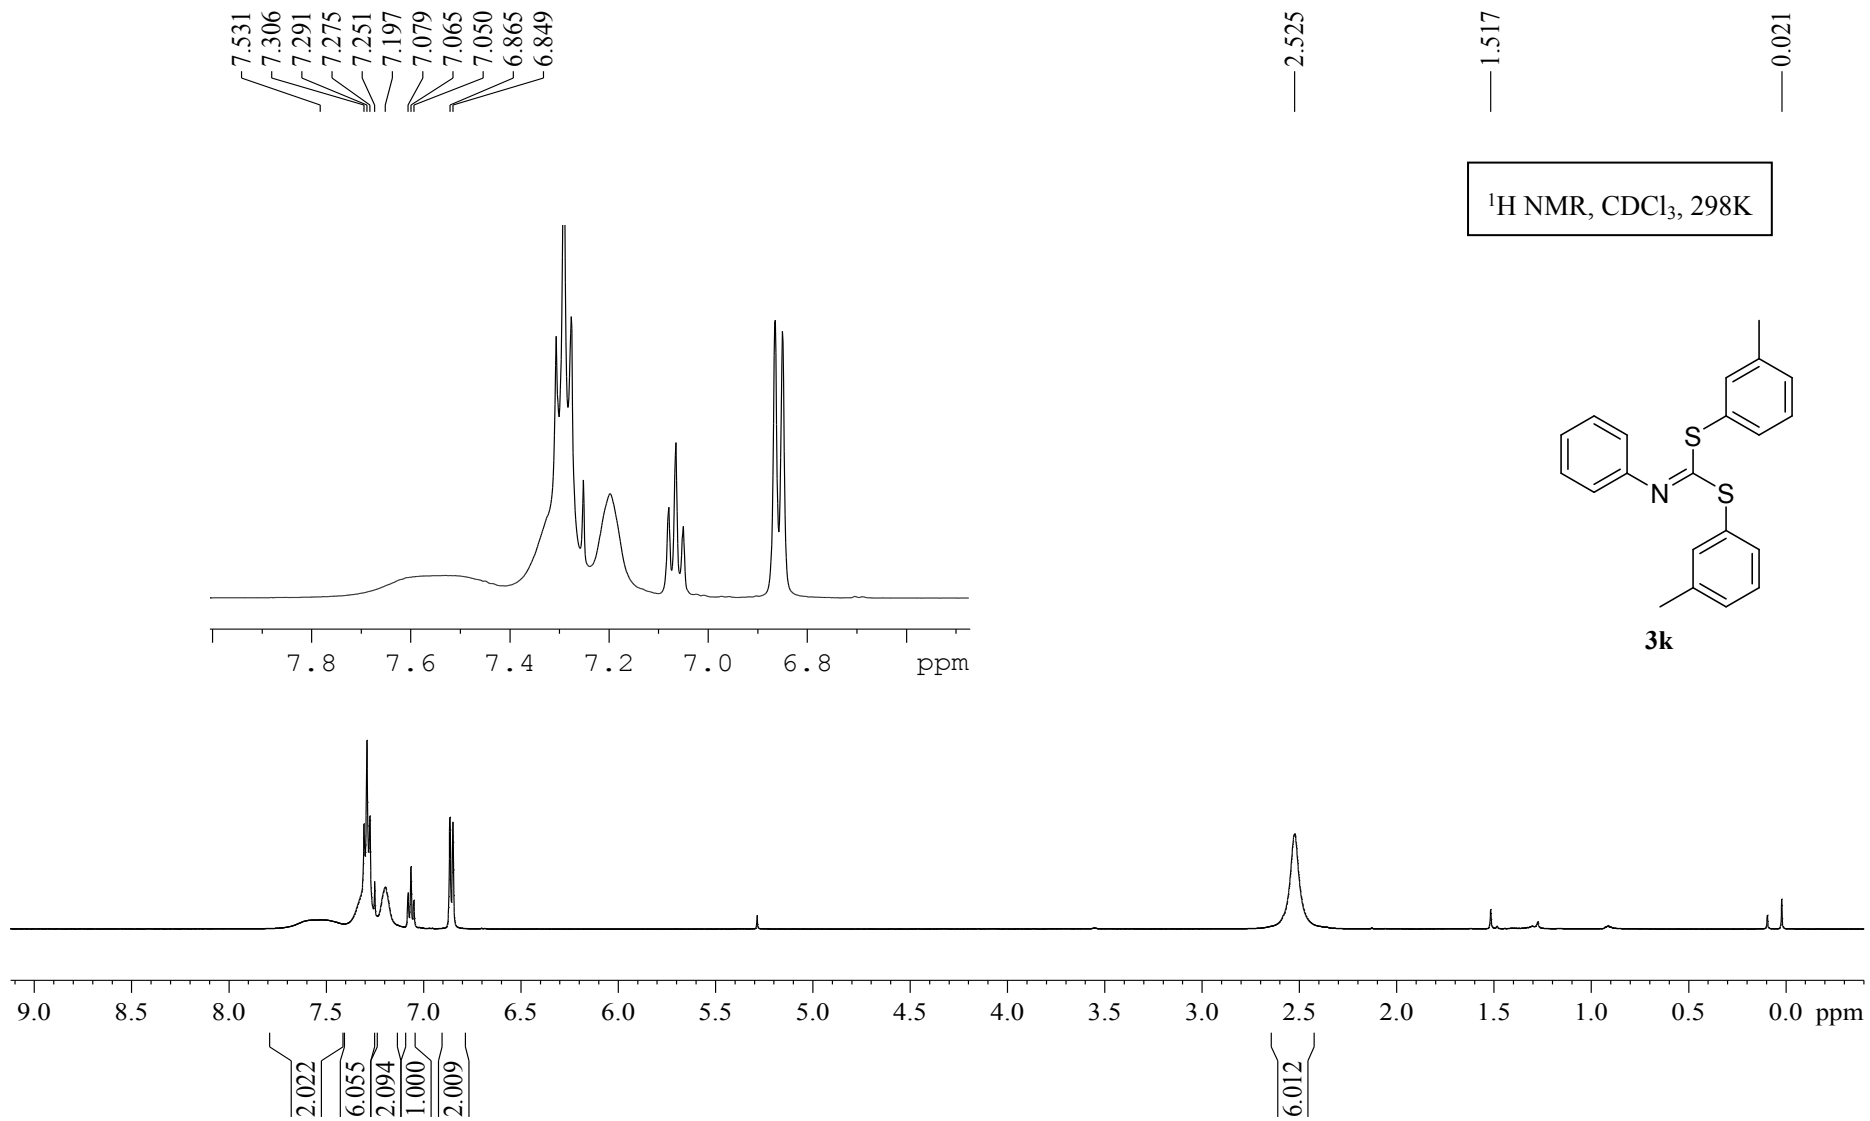

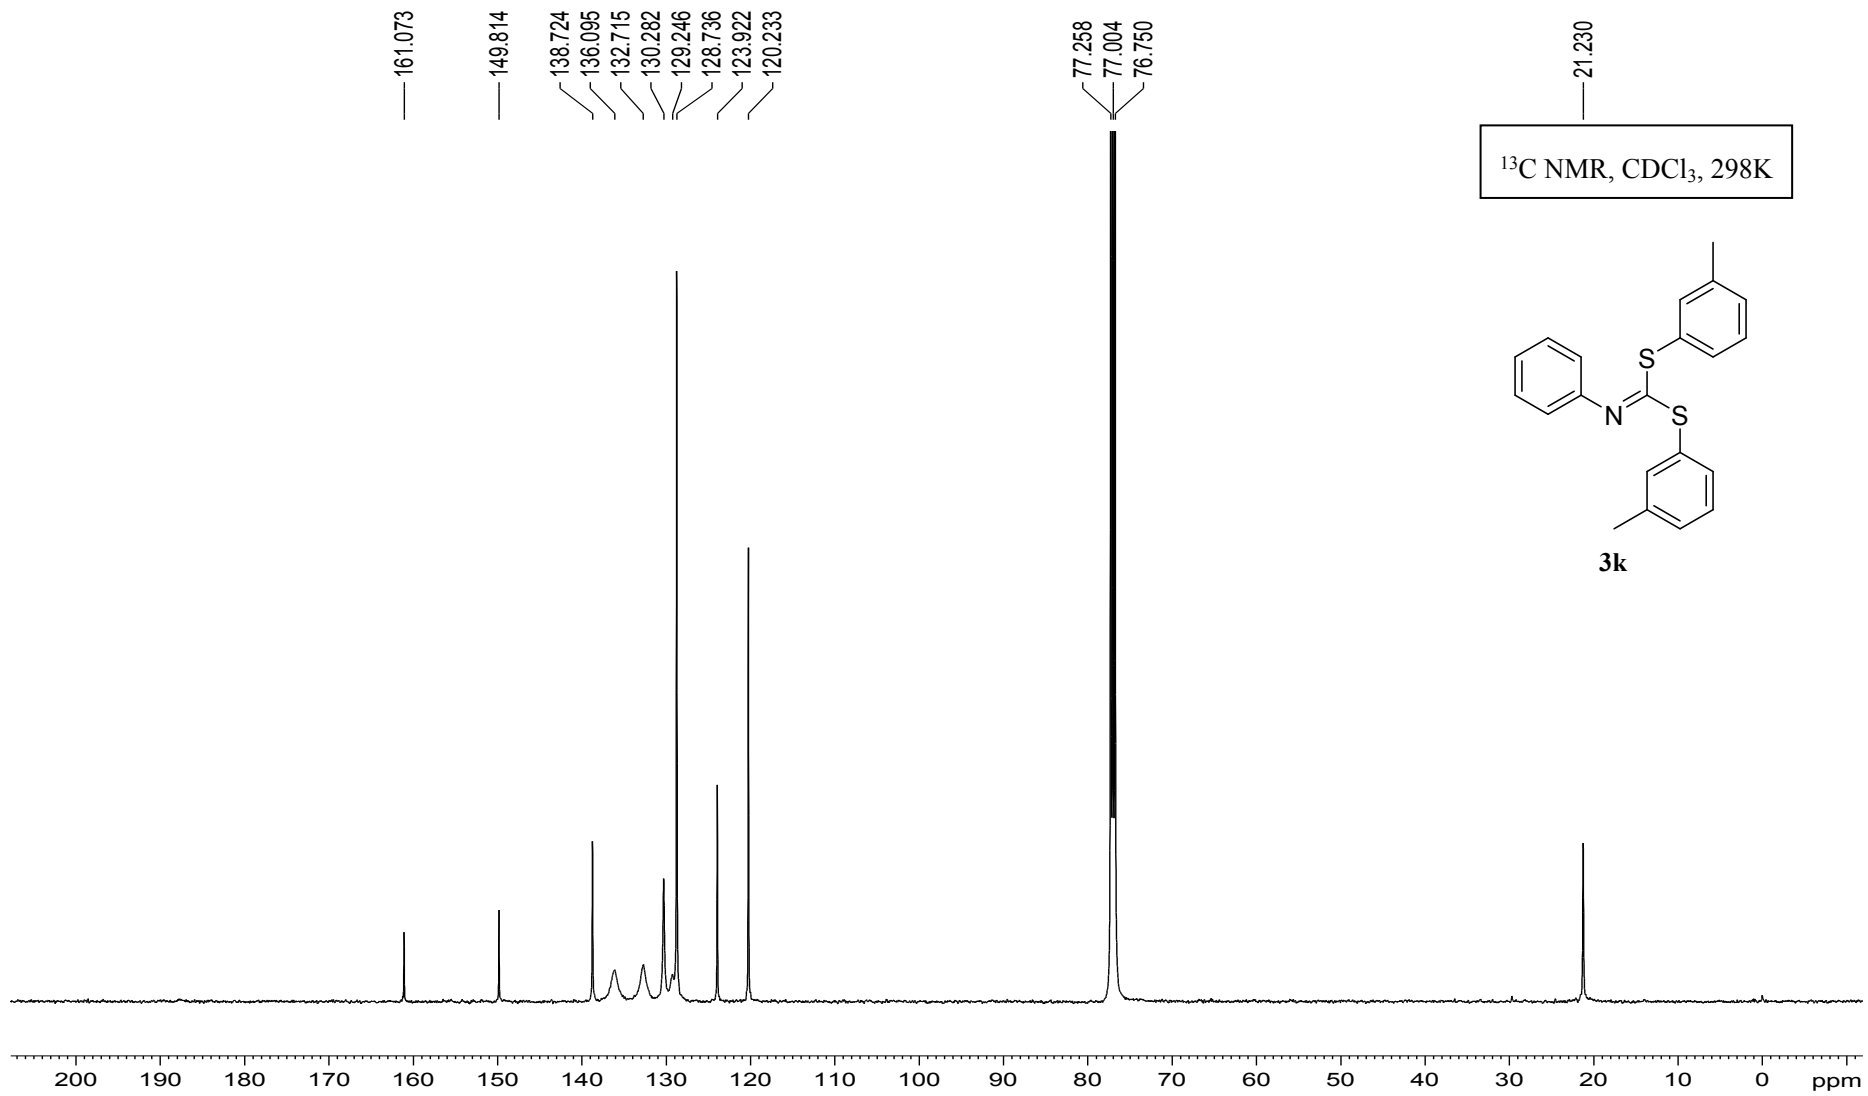

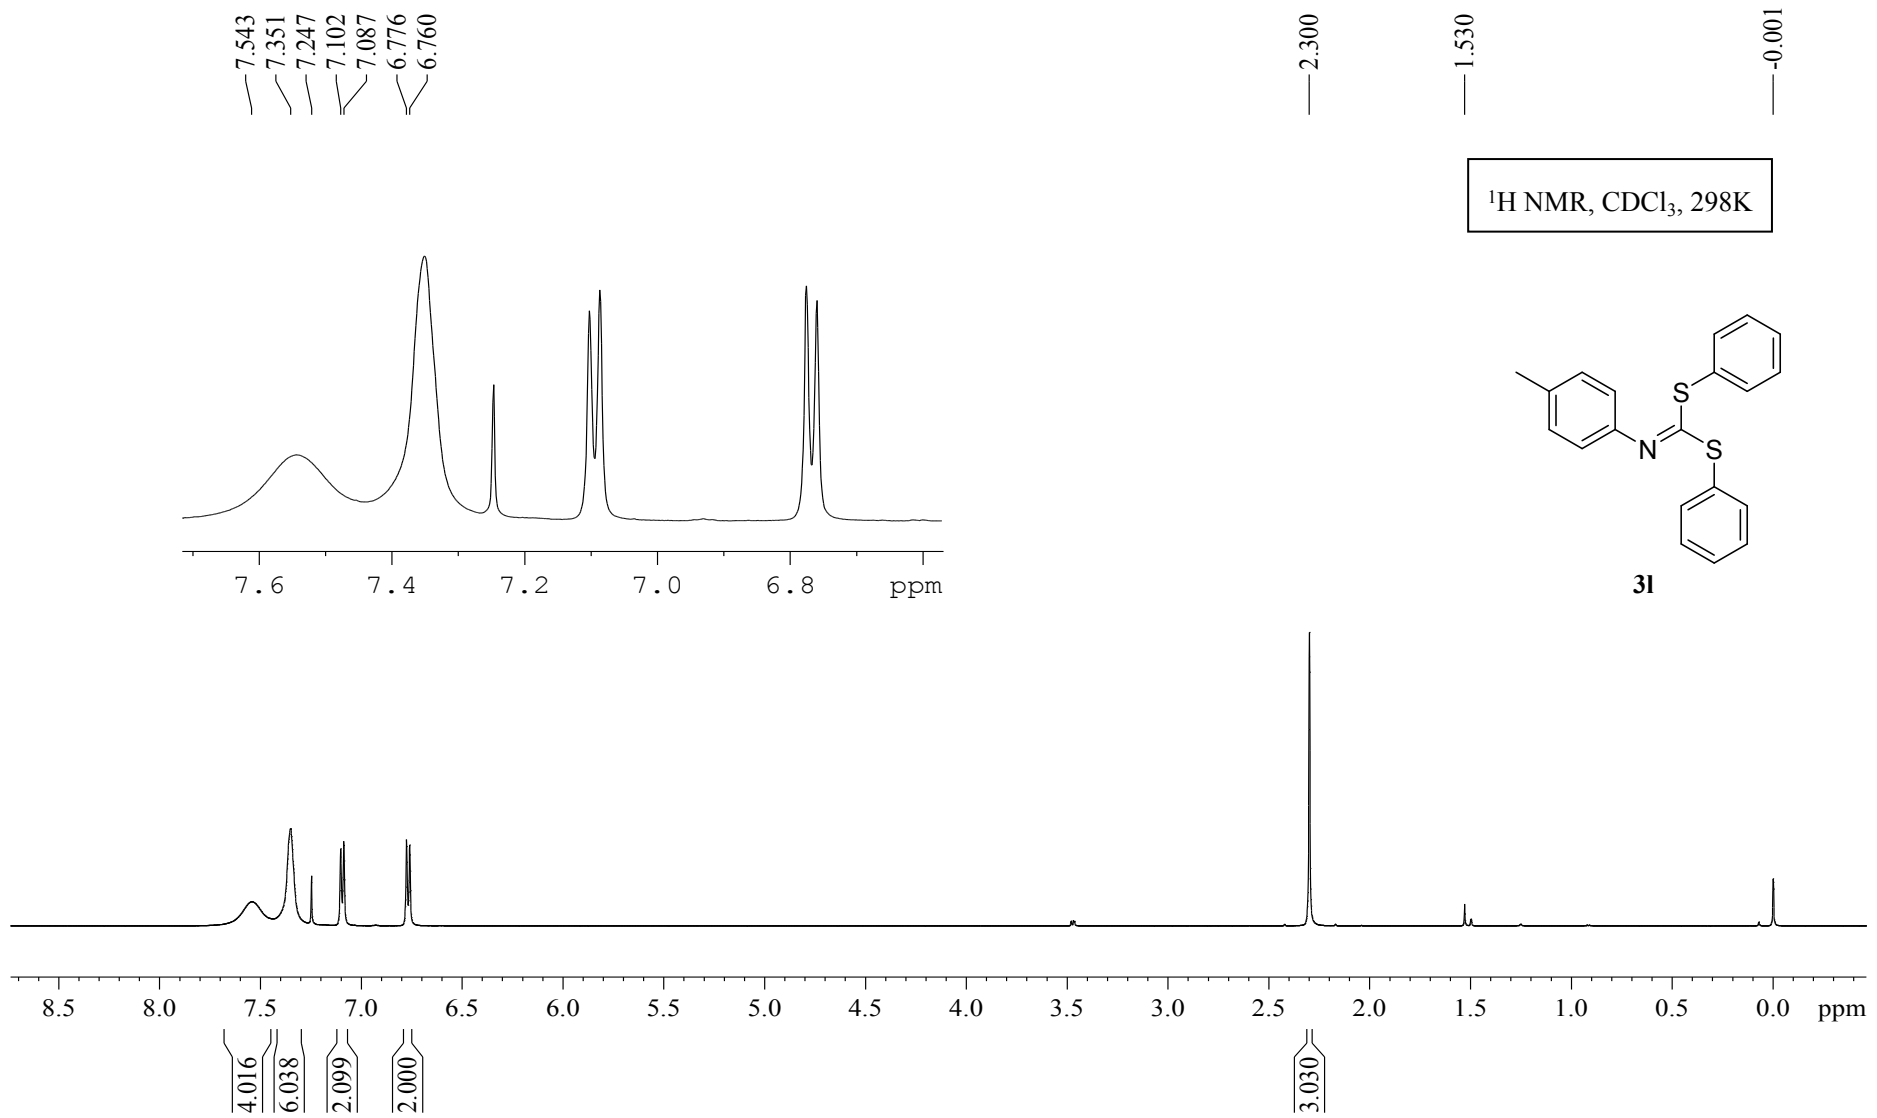



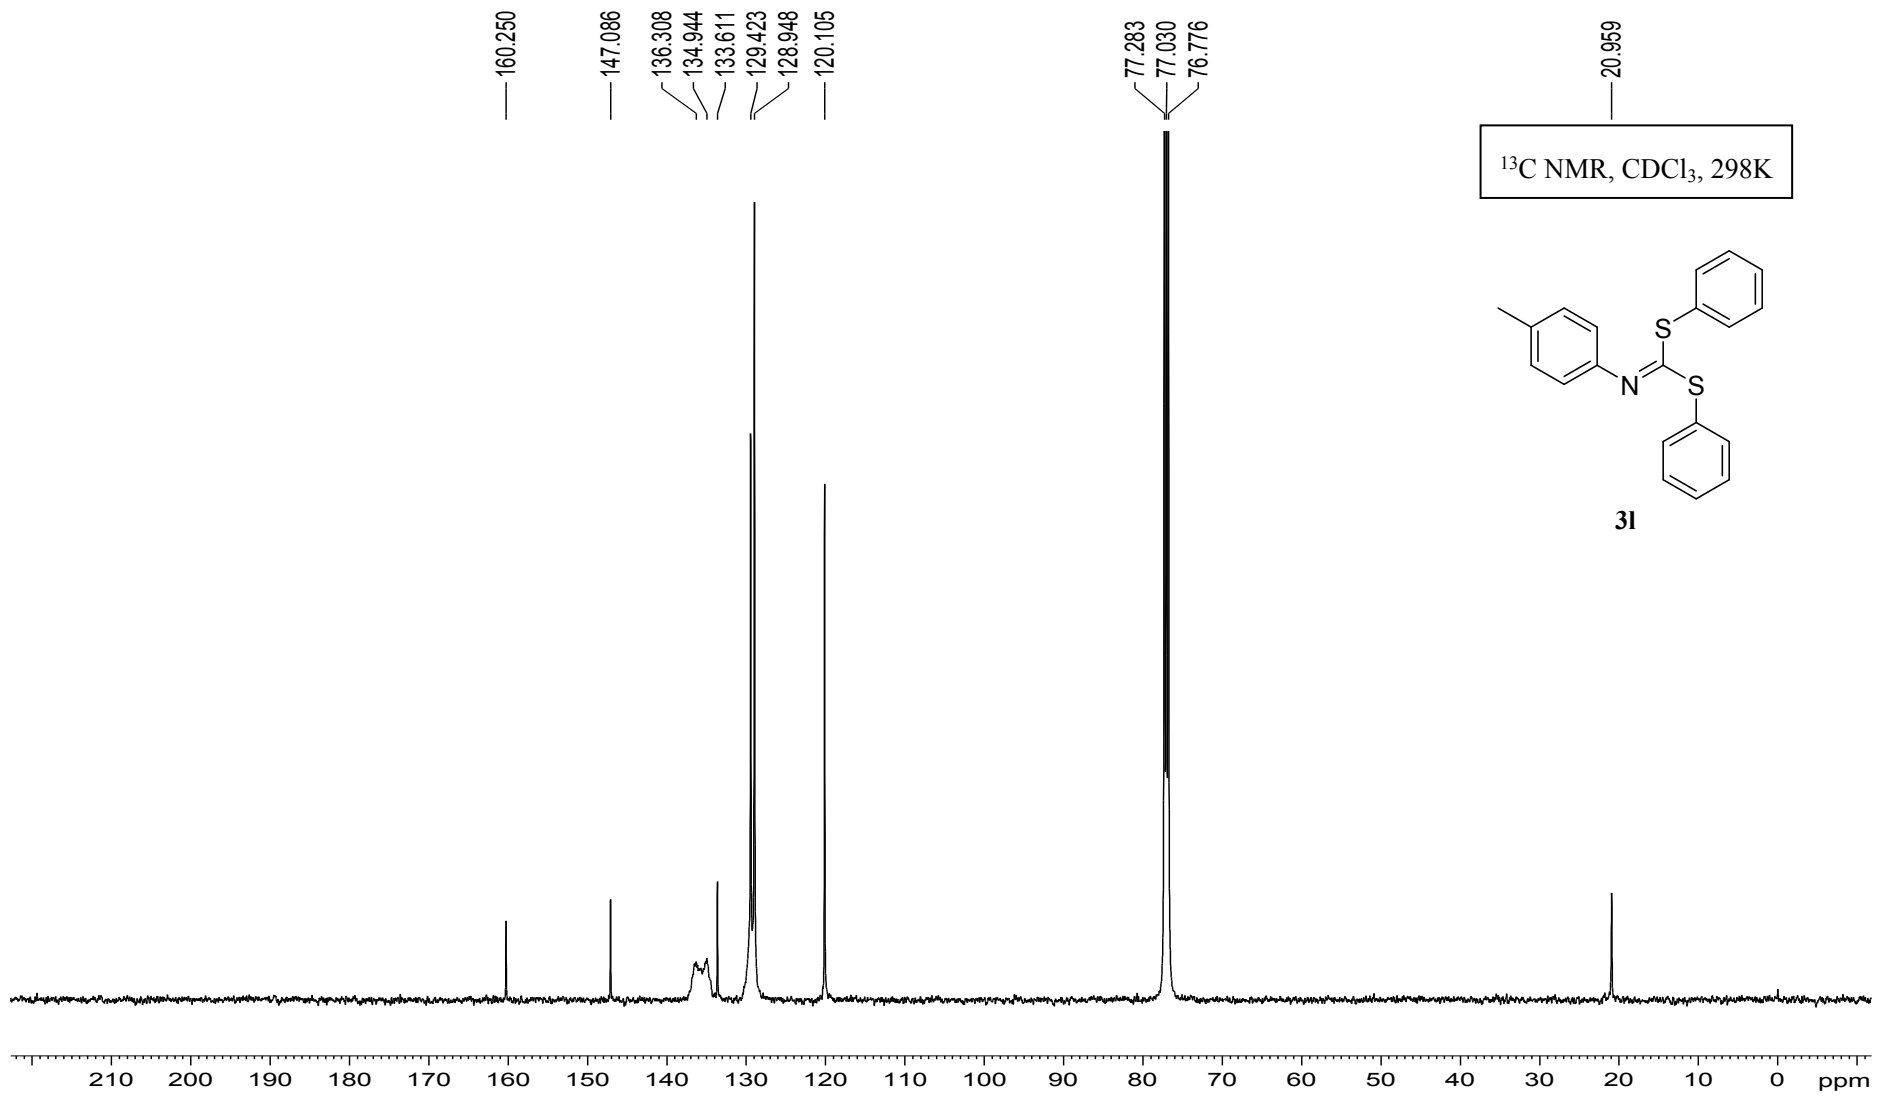

7.549  
7.372  
7.261  
6.990  
6.973  
6.956  
6.830  
6.820  
6.812  
6.802

1.524

0.008

<sup>1</sup>H NMR, CDCl<sub>3</sub>, 298K

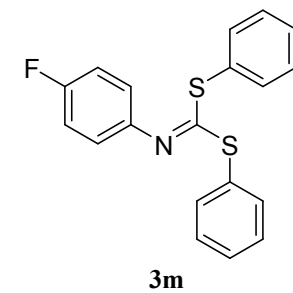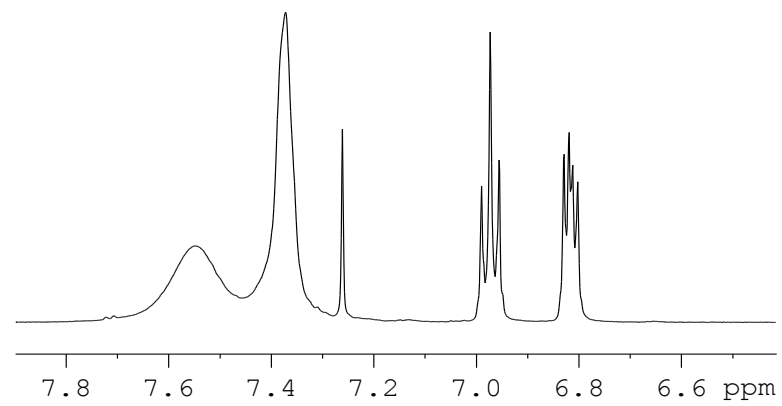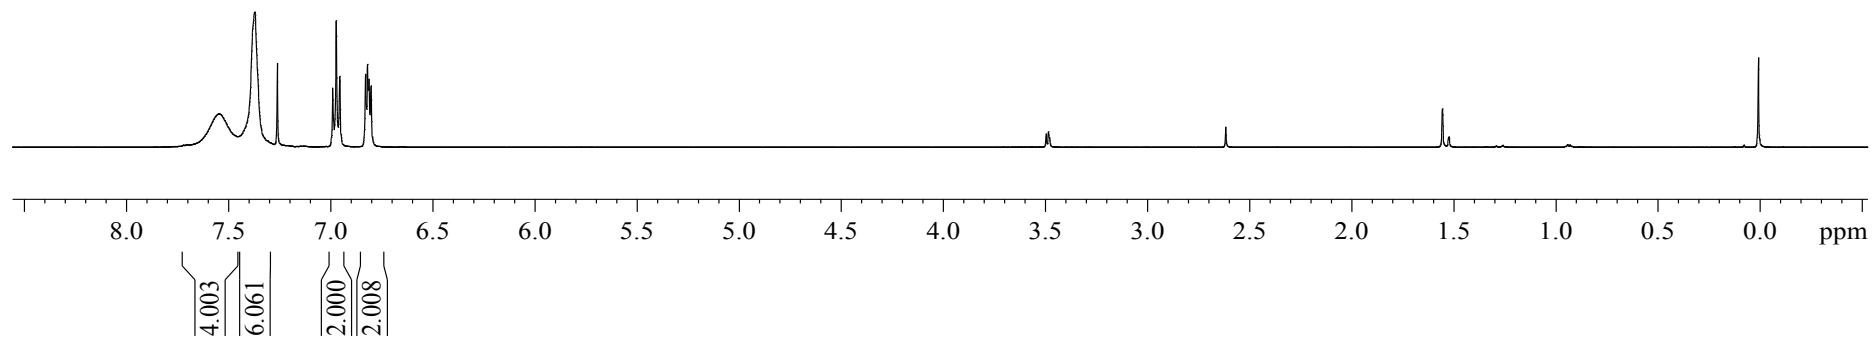

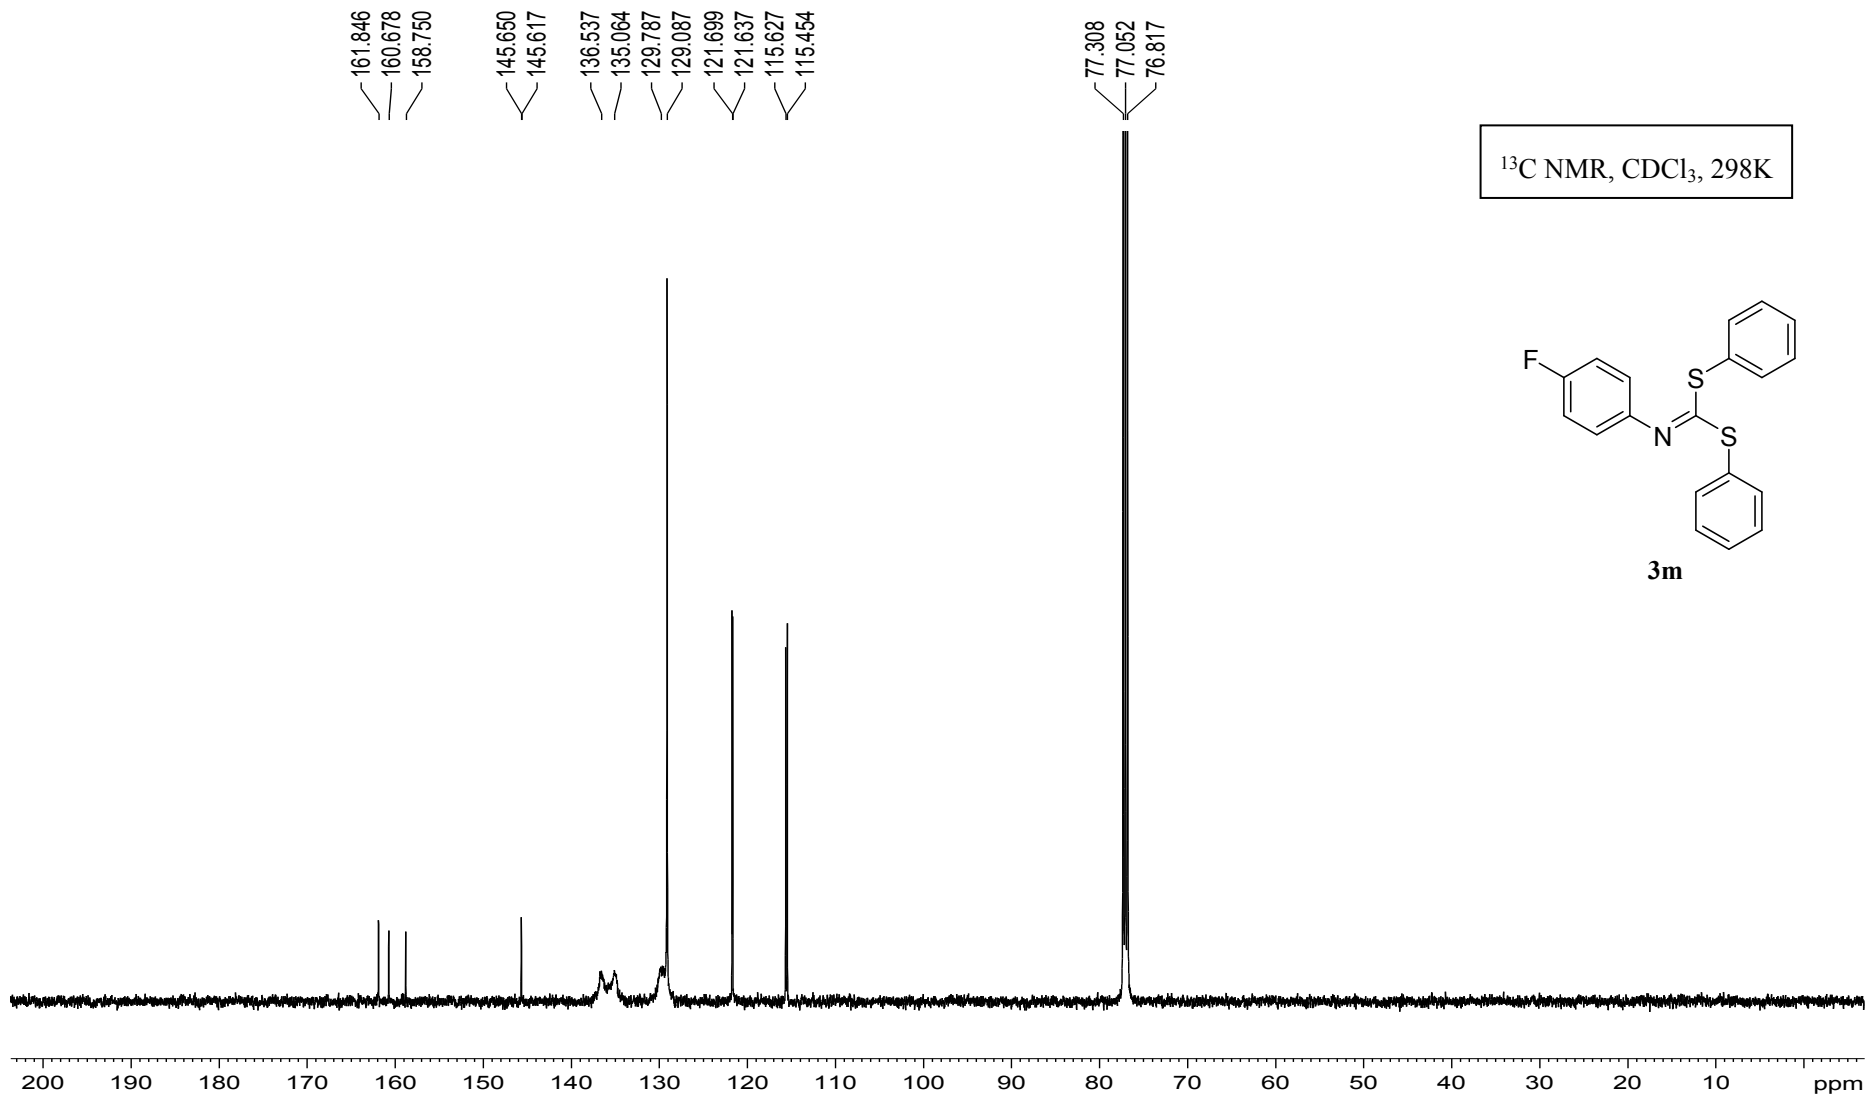

7.548  
7.386  
7.374  
7.261  
7.249  
7.232  
6.803  
6.786

1.549

0.013

<sup>1</sup>H NMR, CDCl<sub>3</sub>, 298K

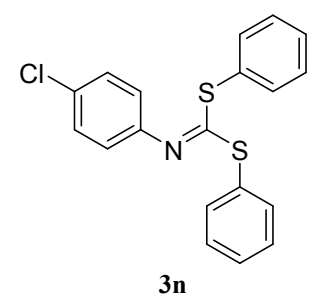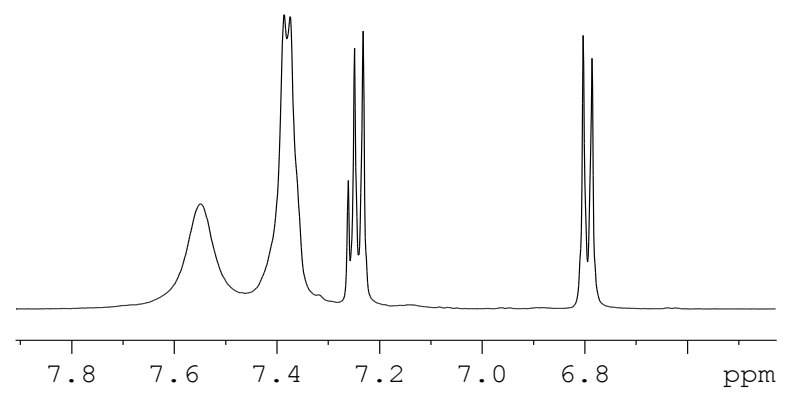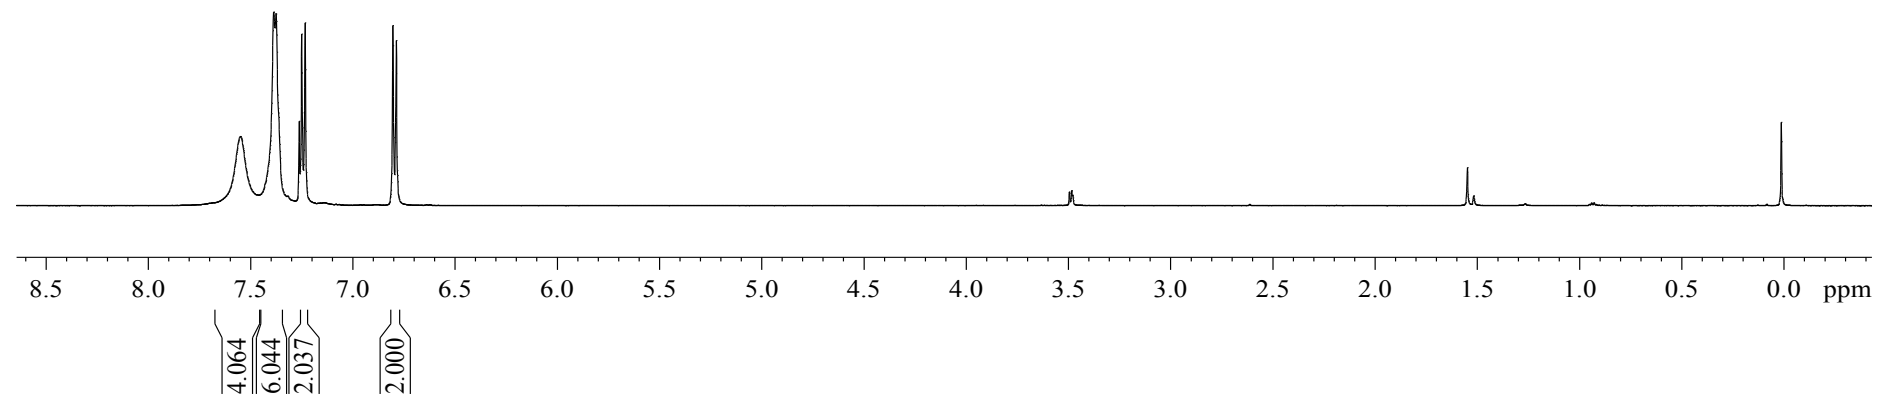

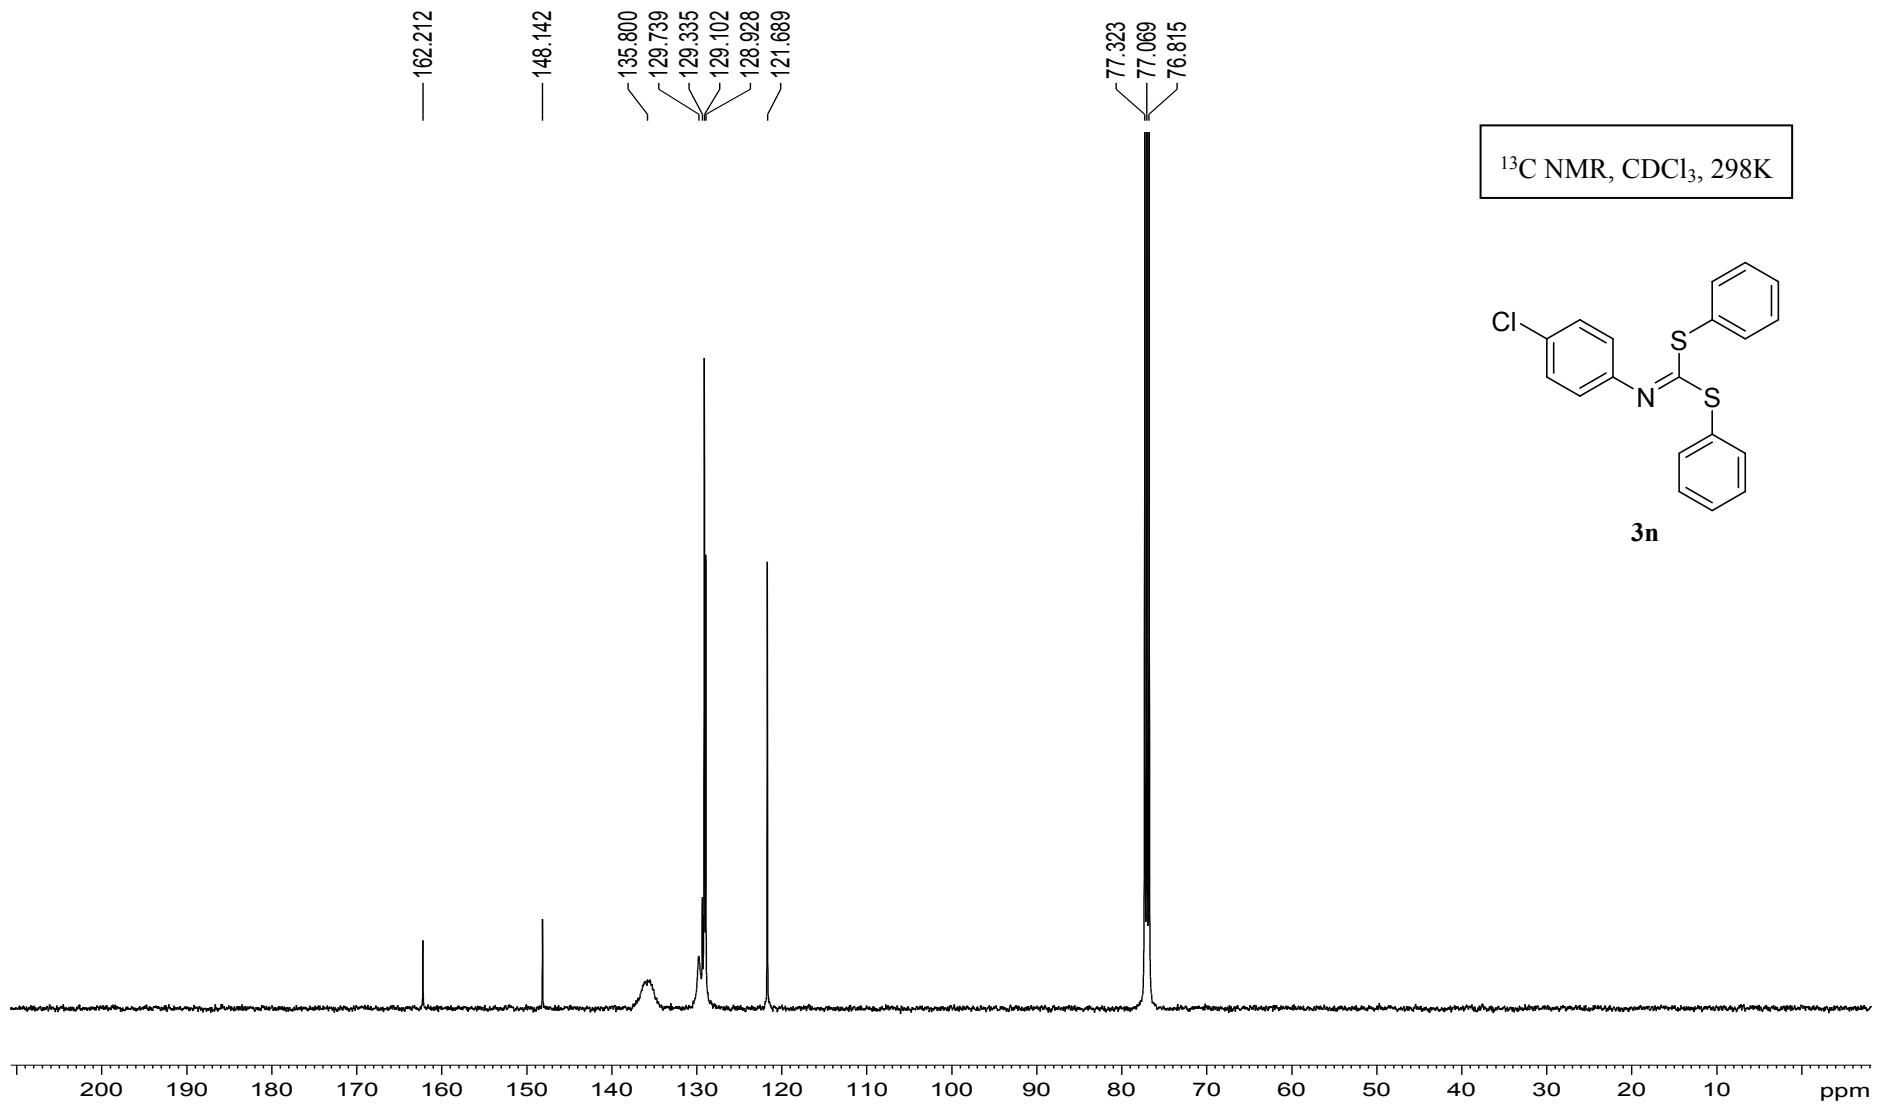

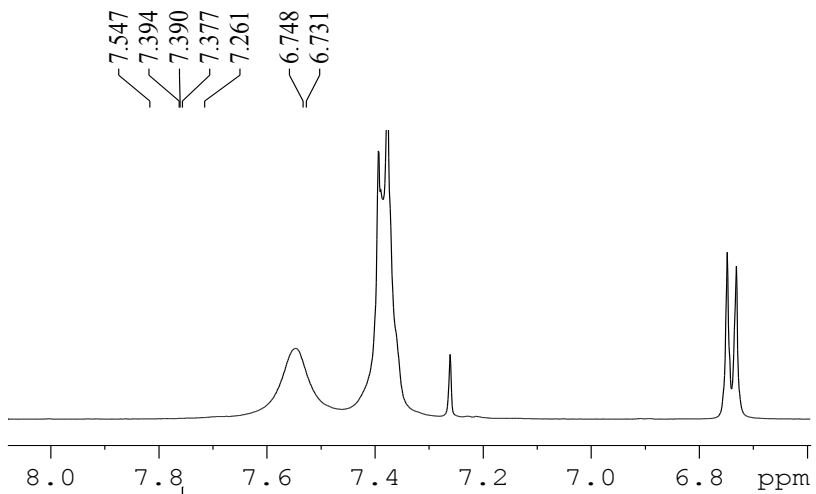

1.541  
0.013  
**<sup>1</sup>H NMR, CDCl<sub>3</sub>, 298K**

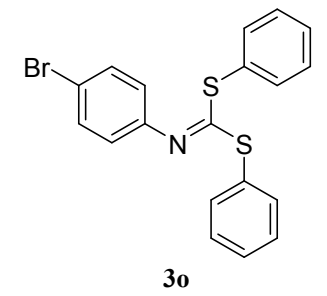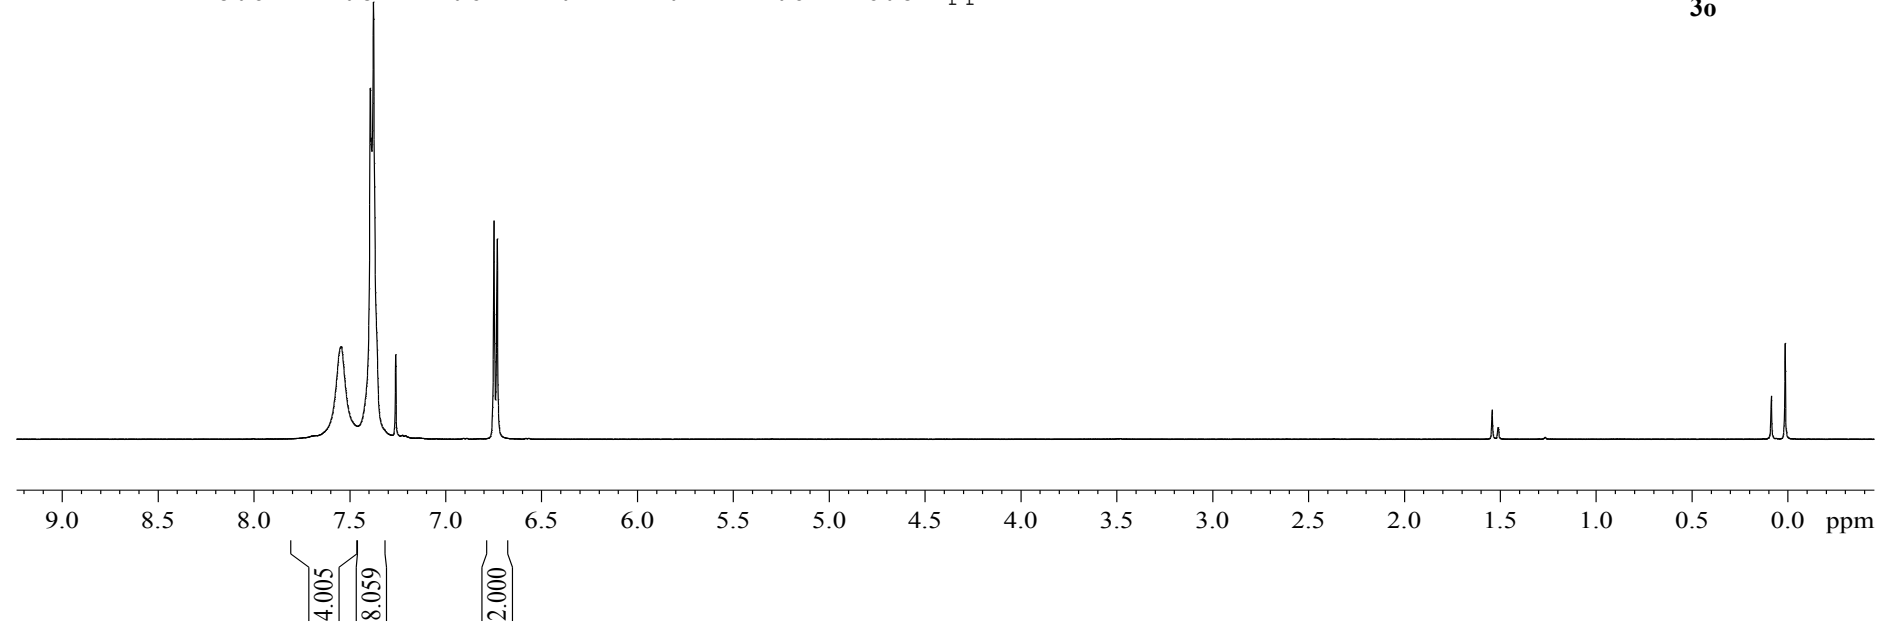

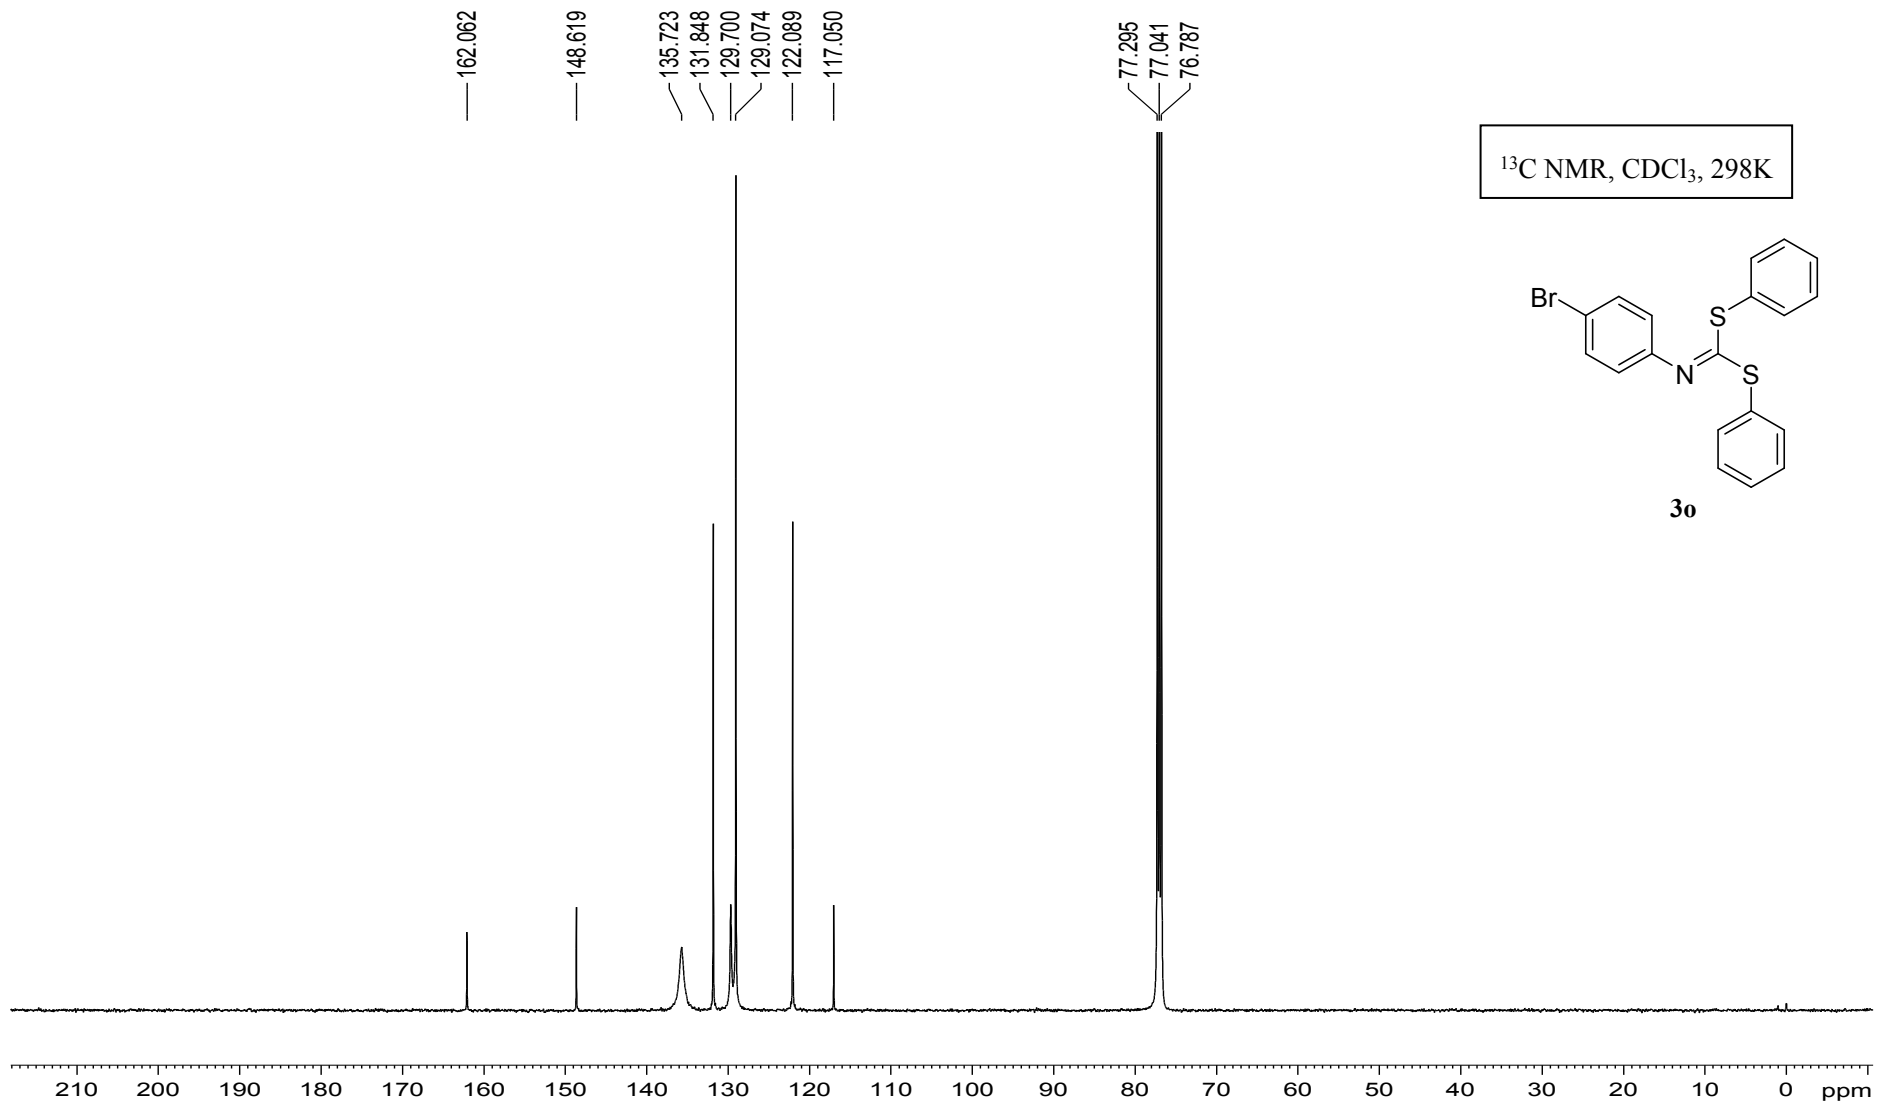

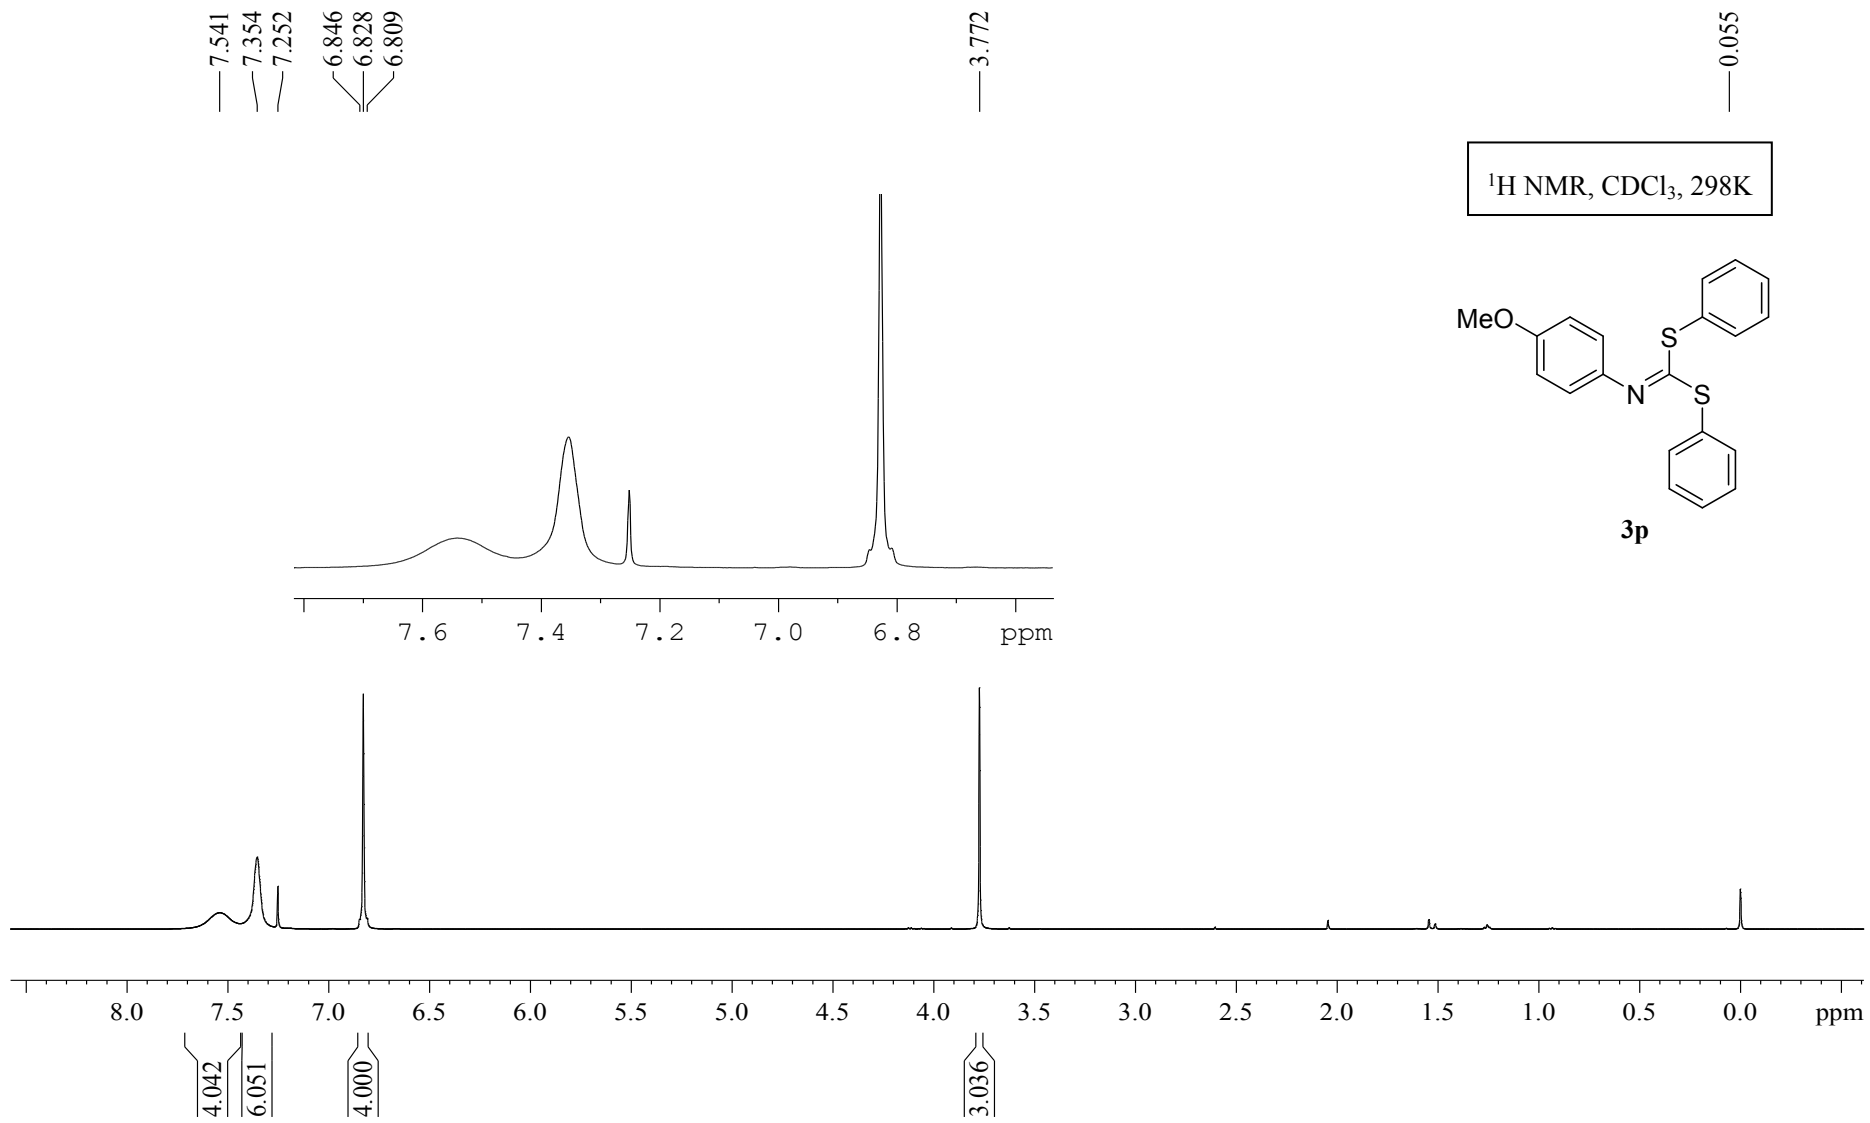



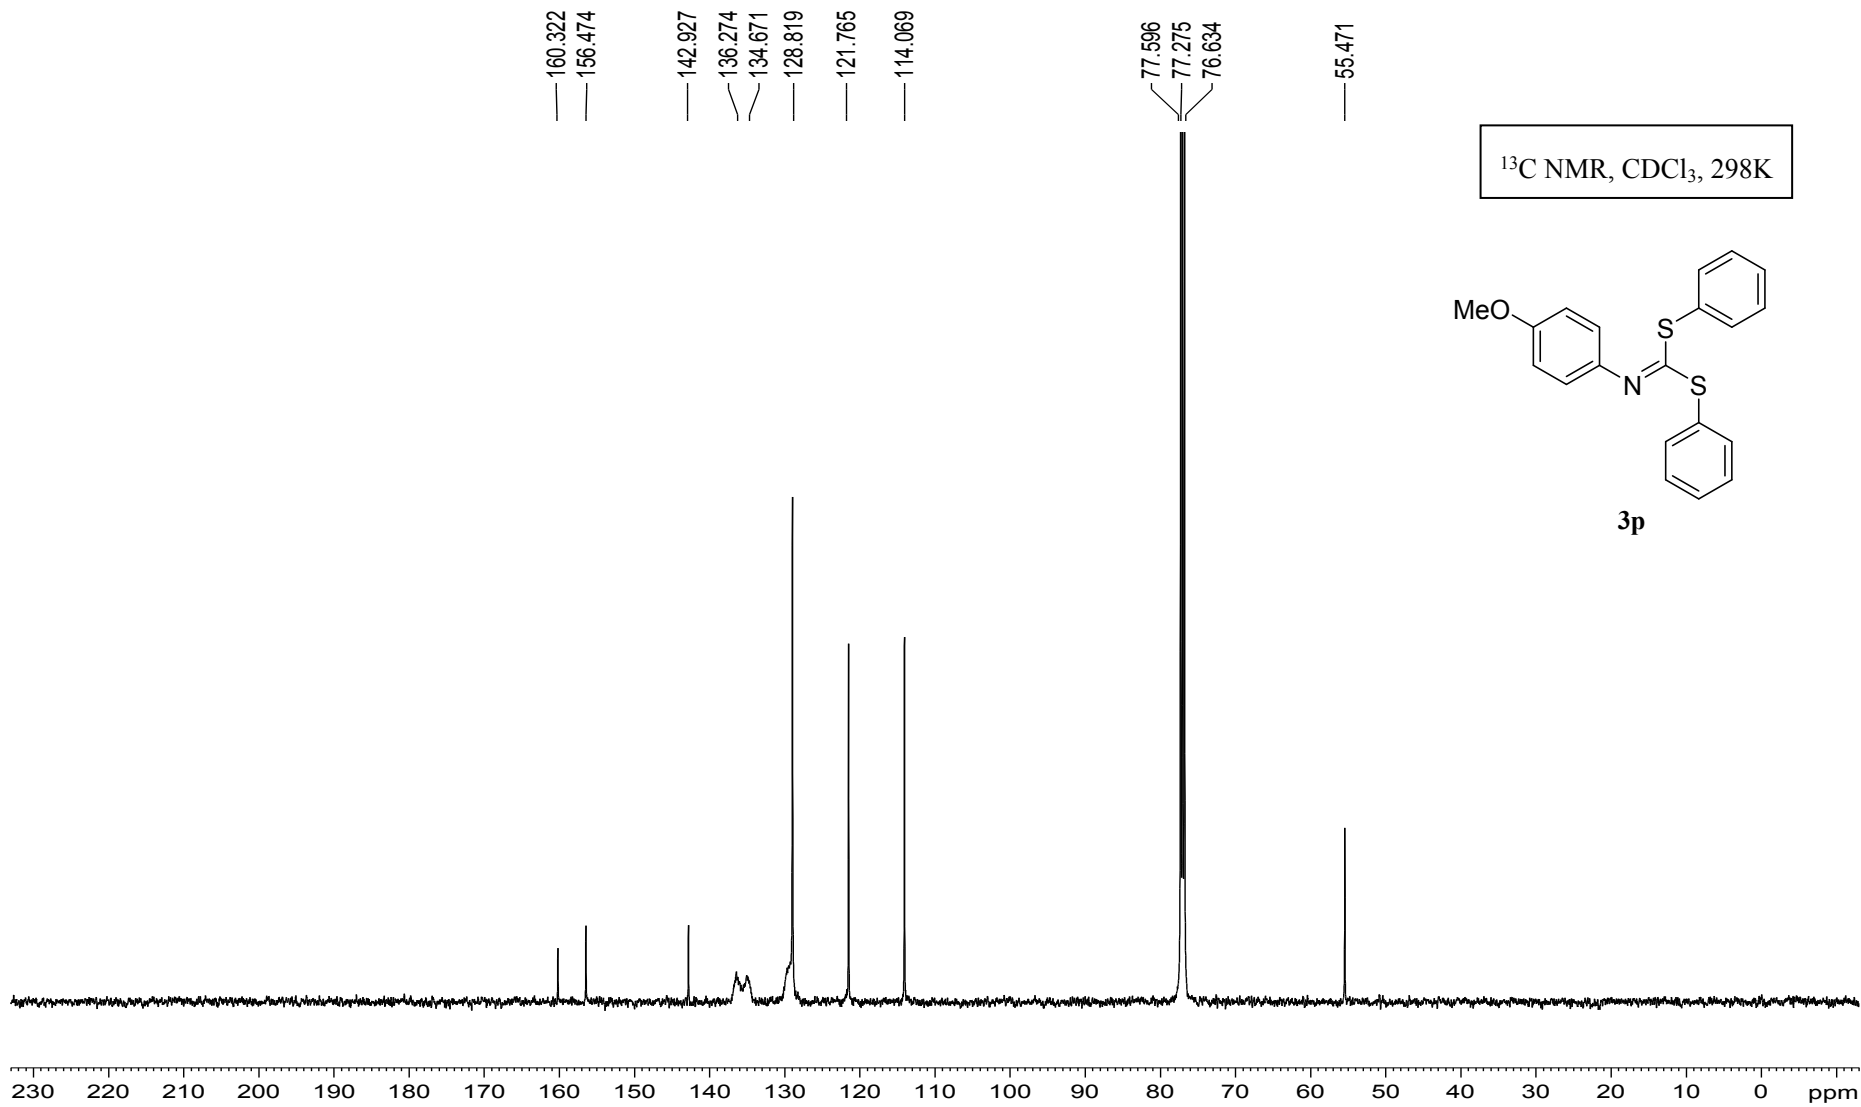

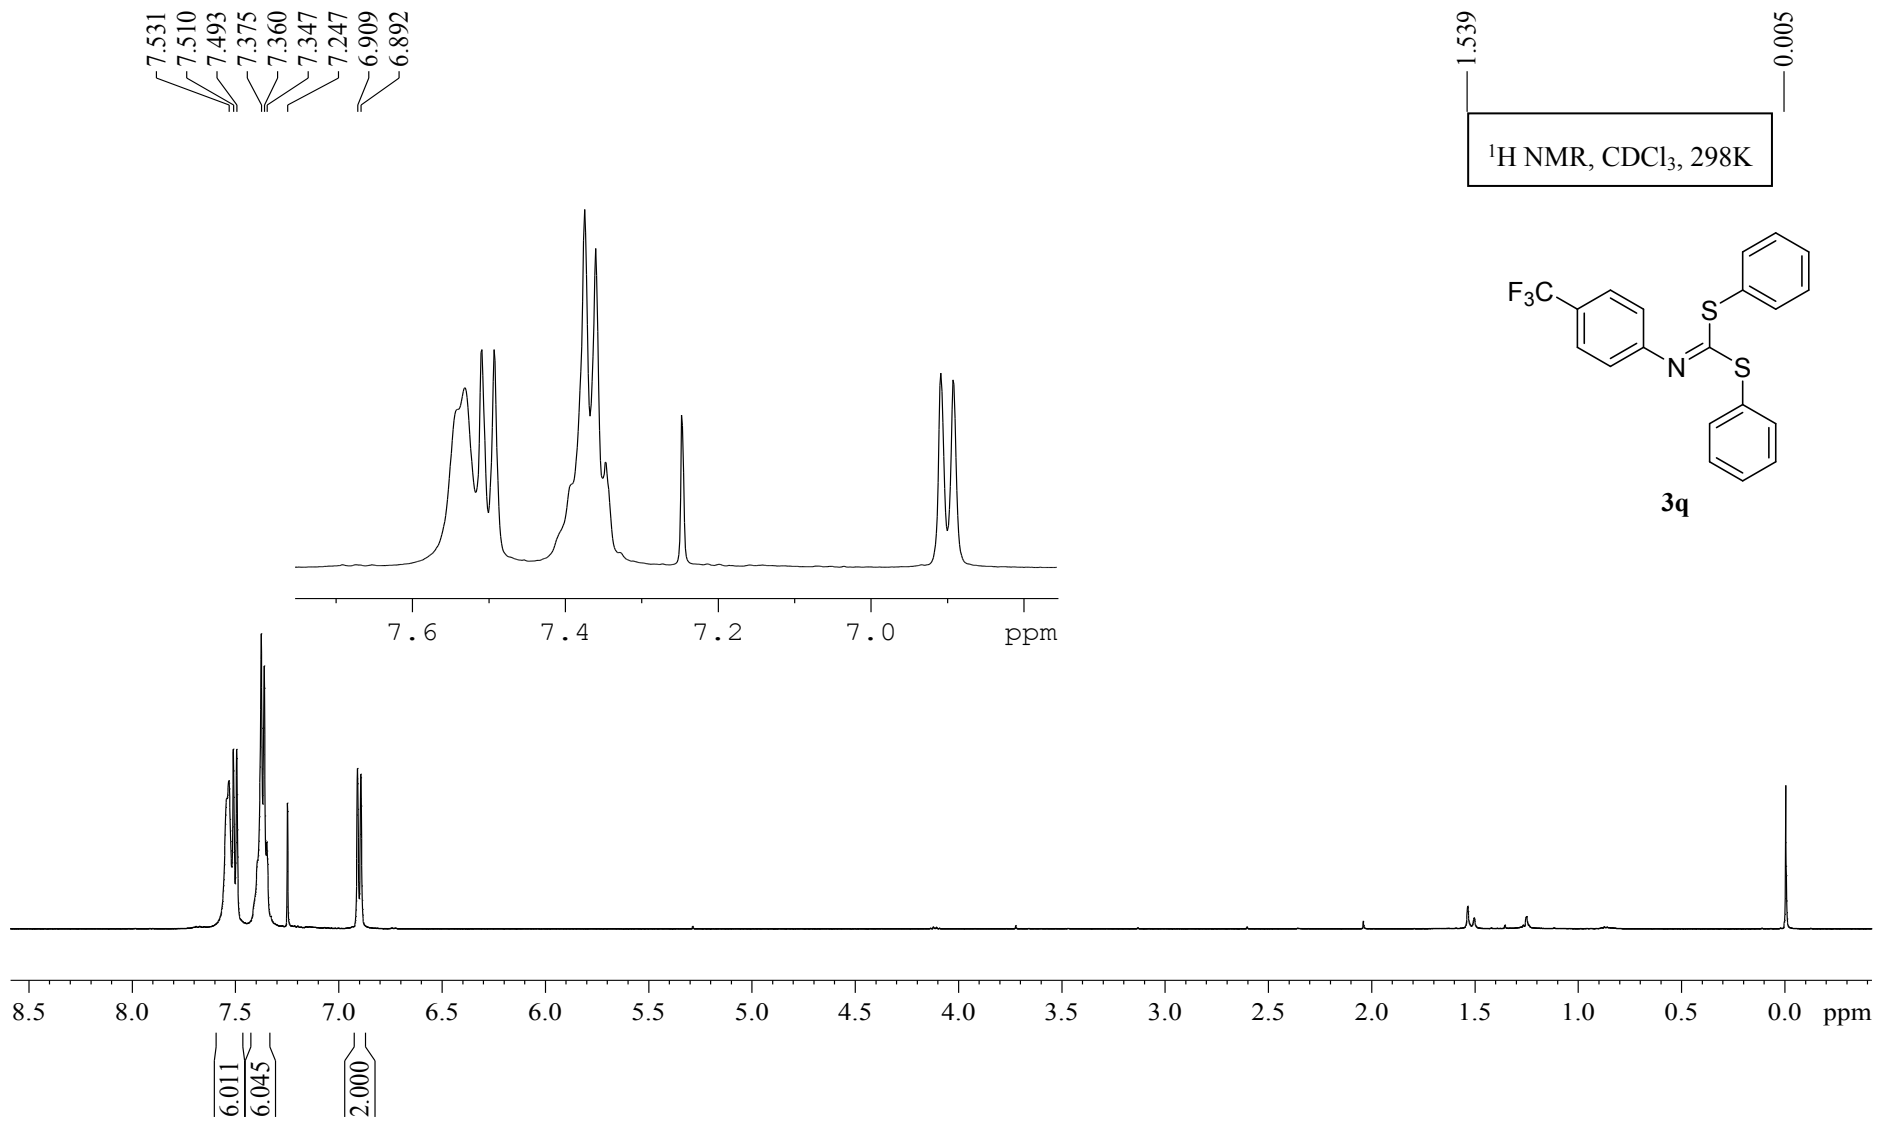

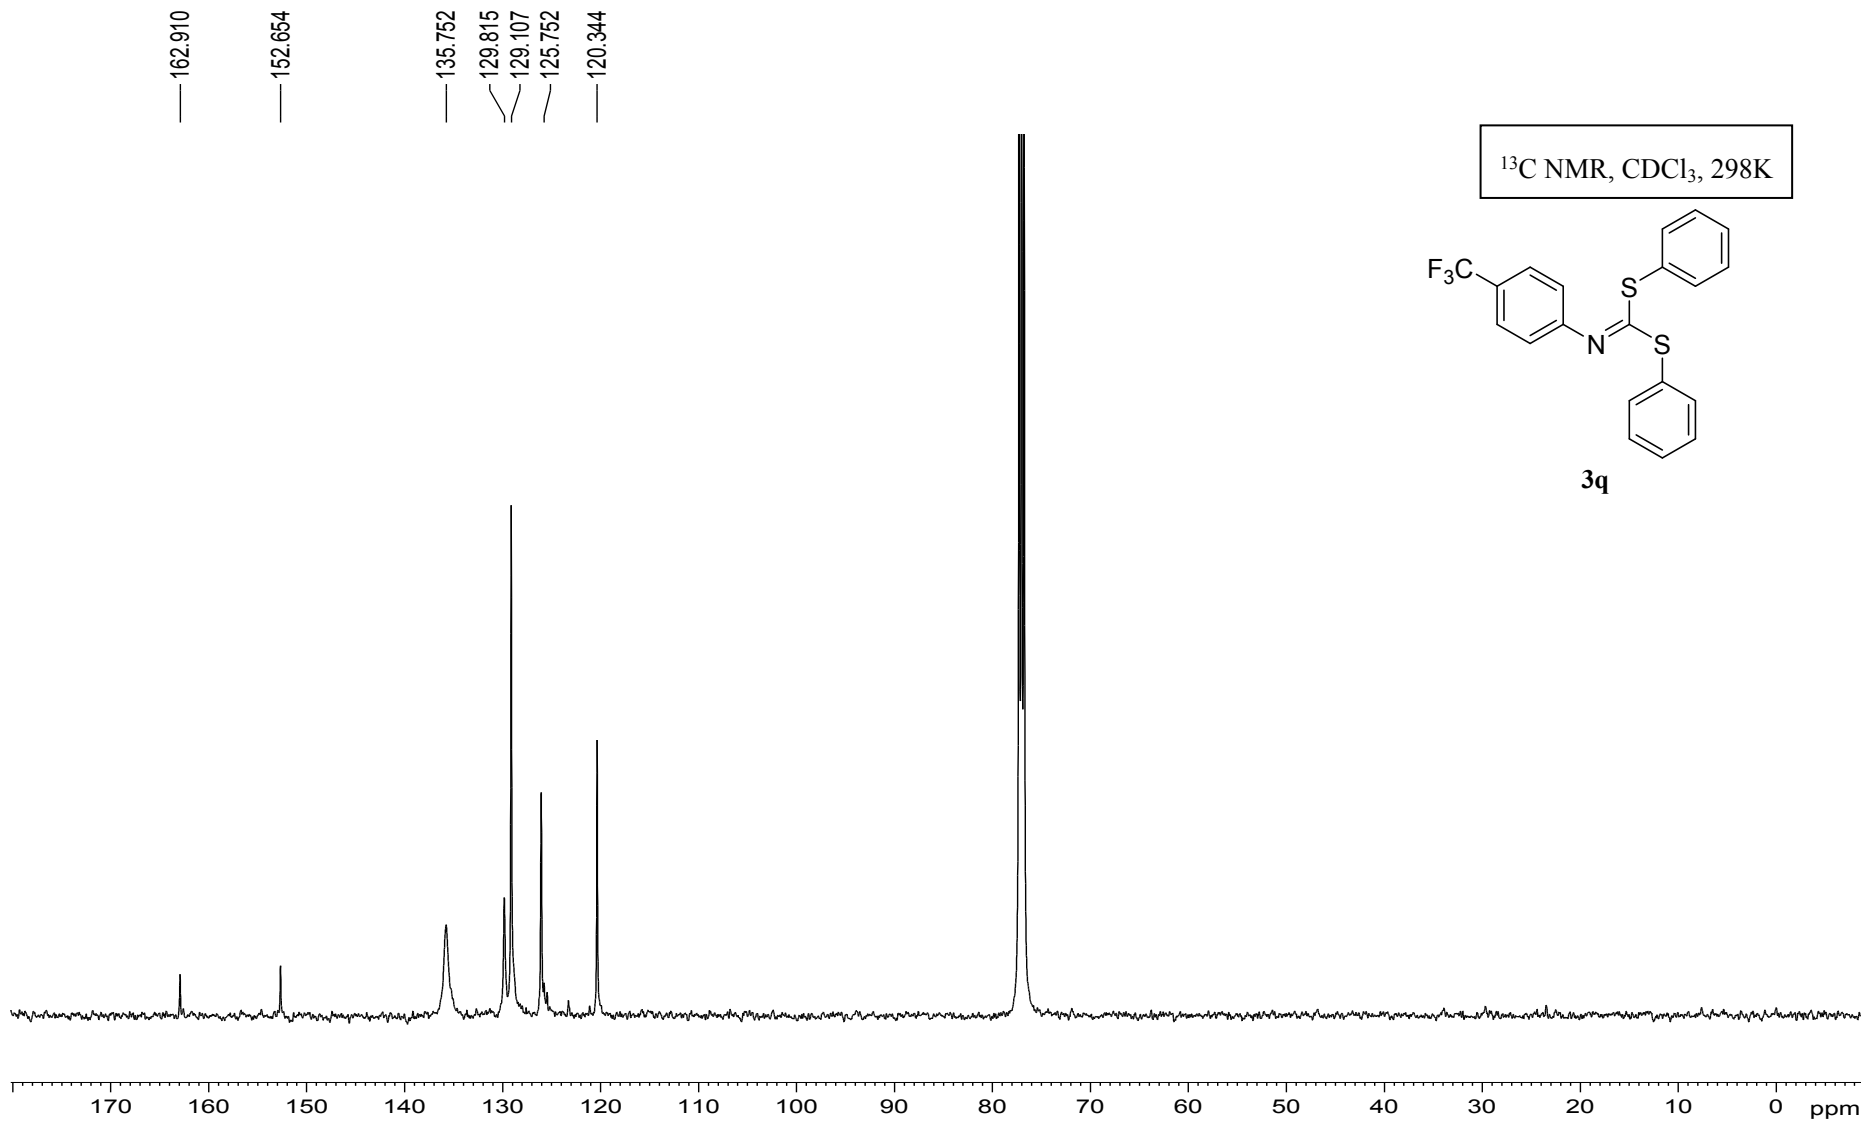

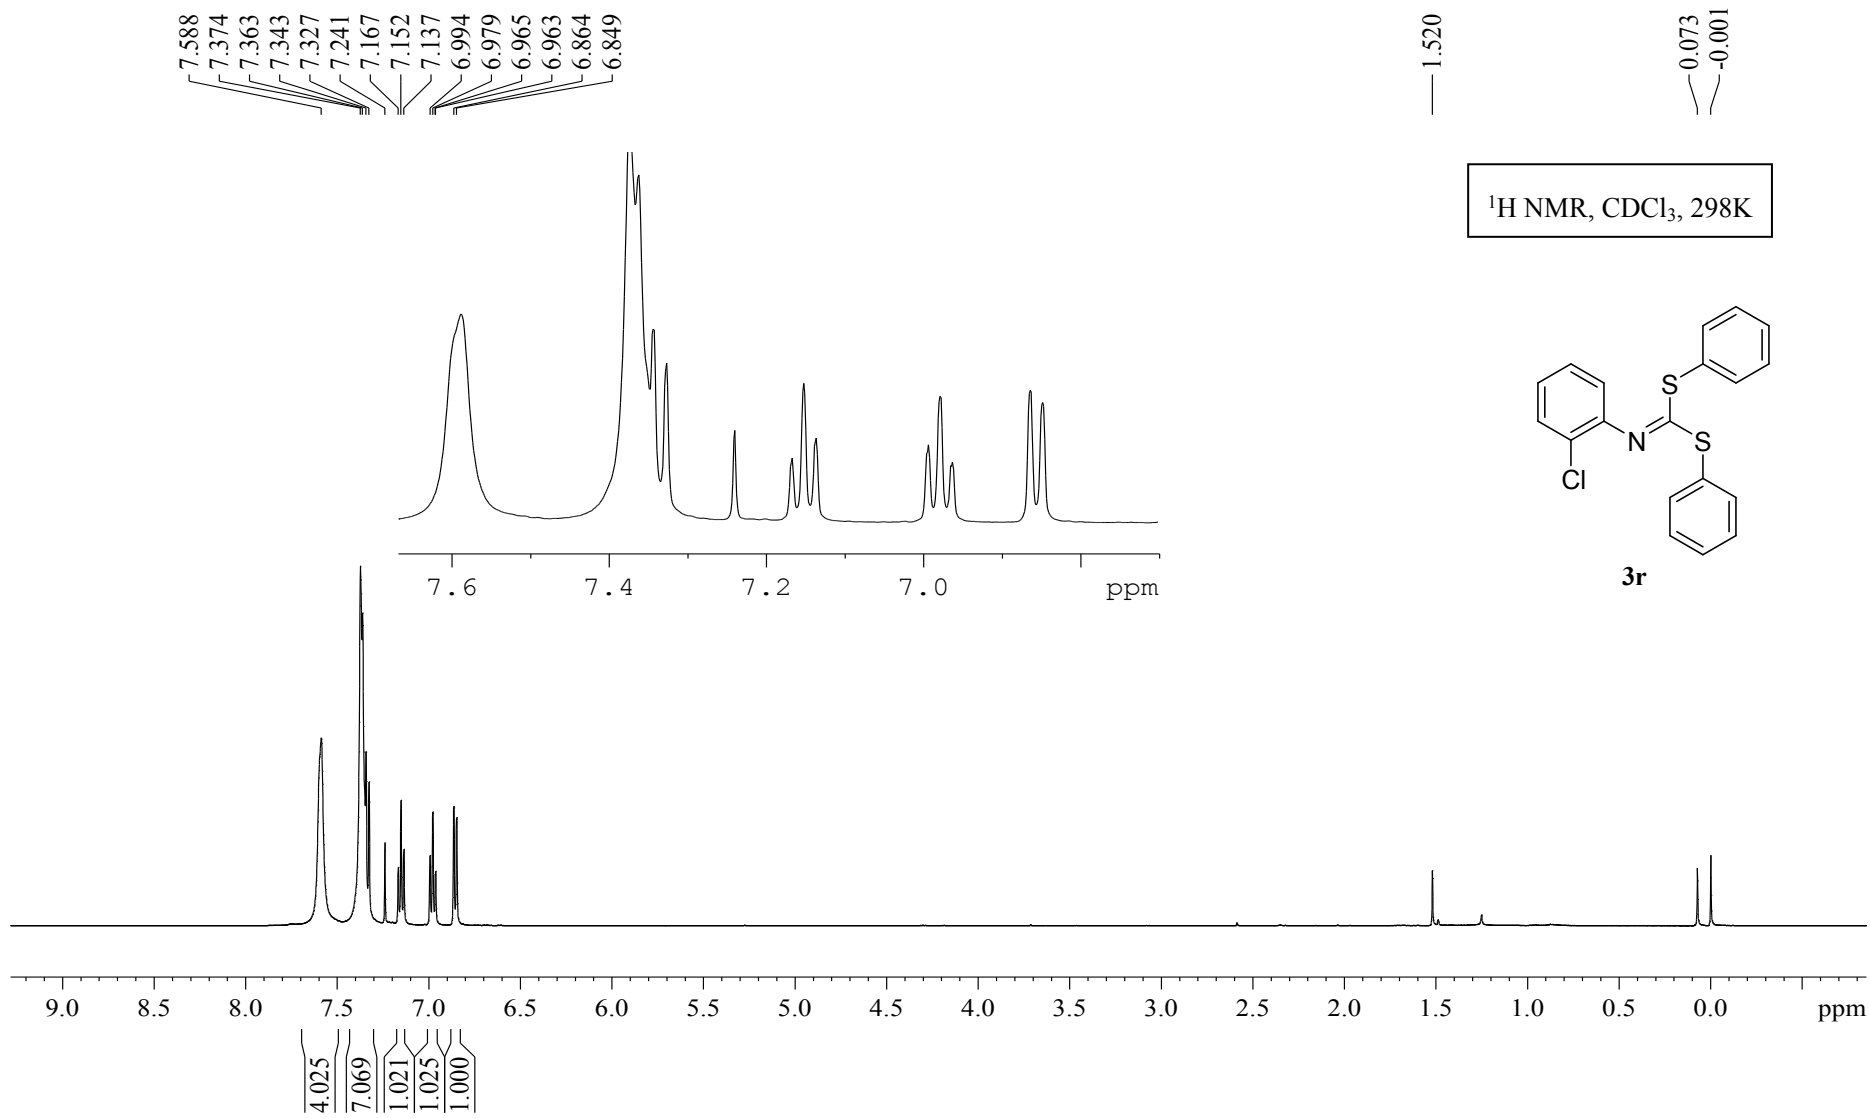

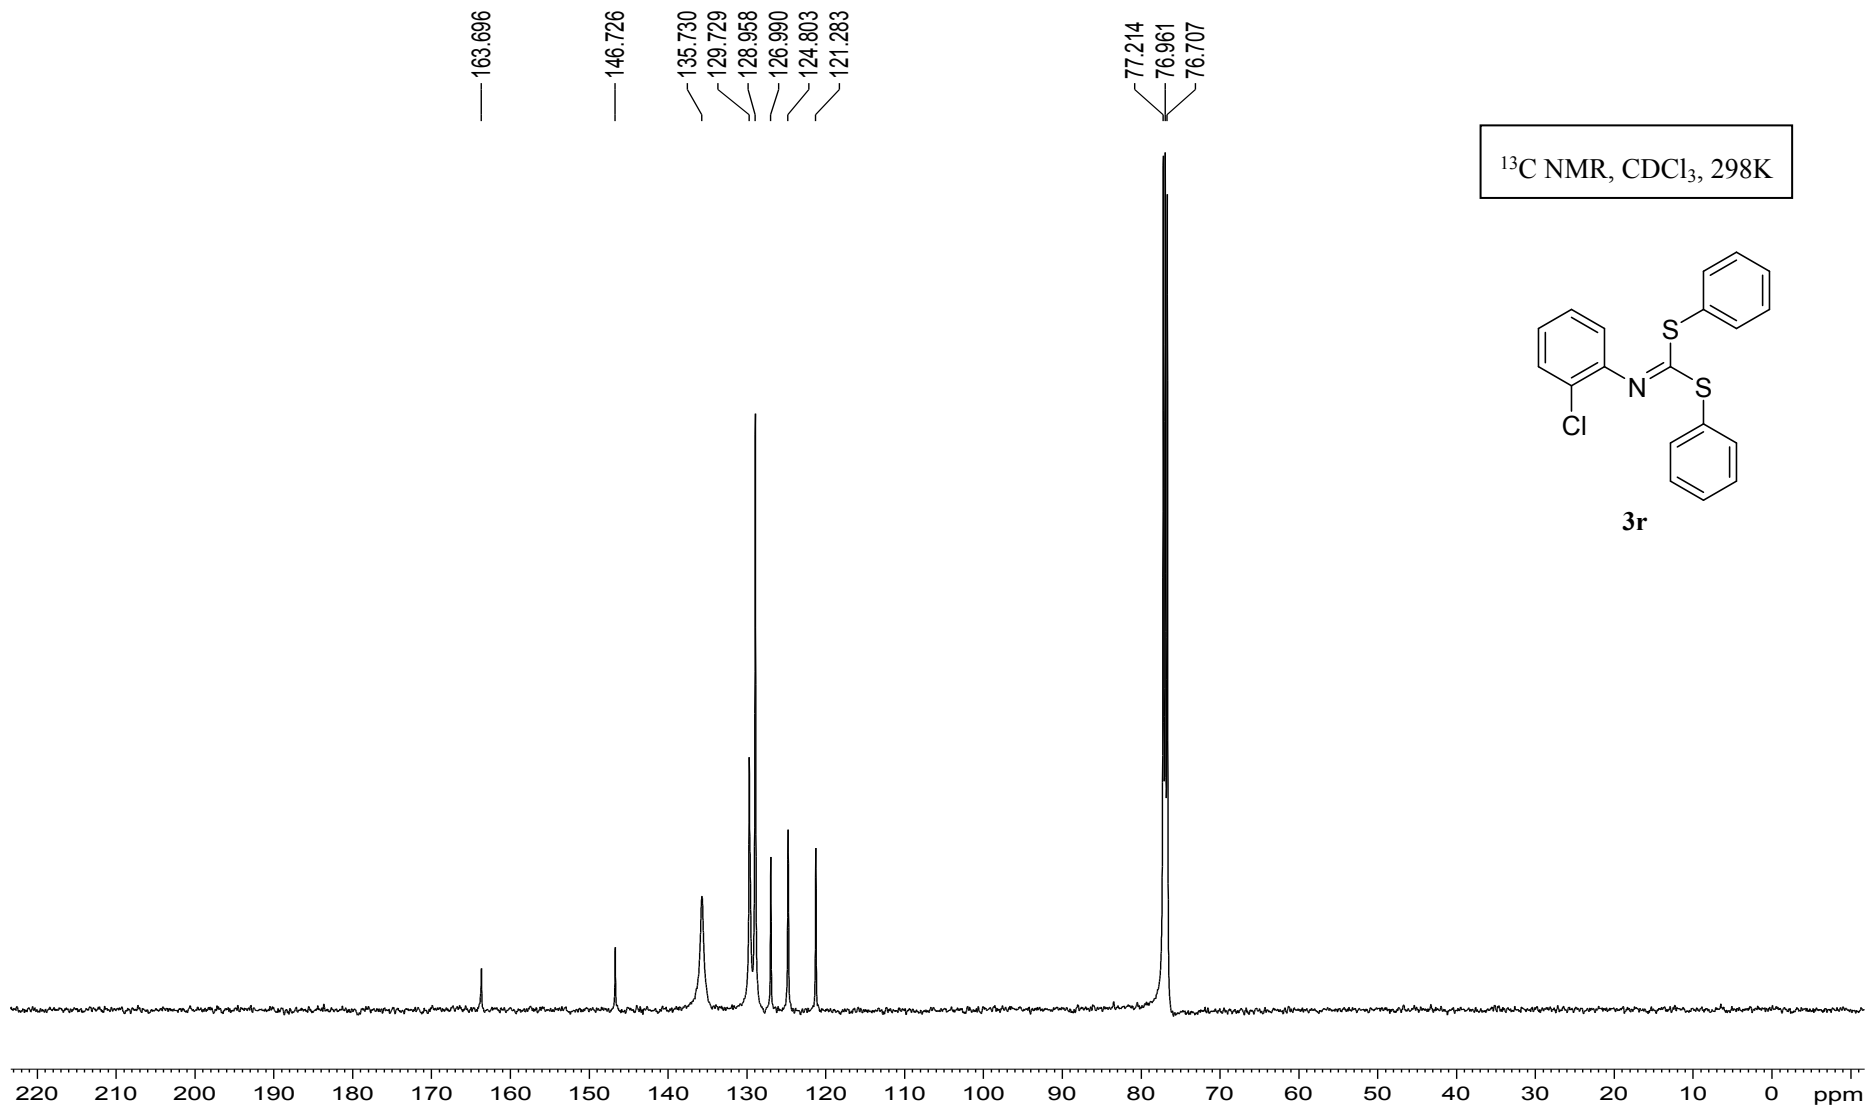

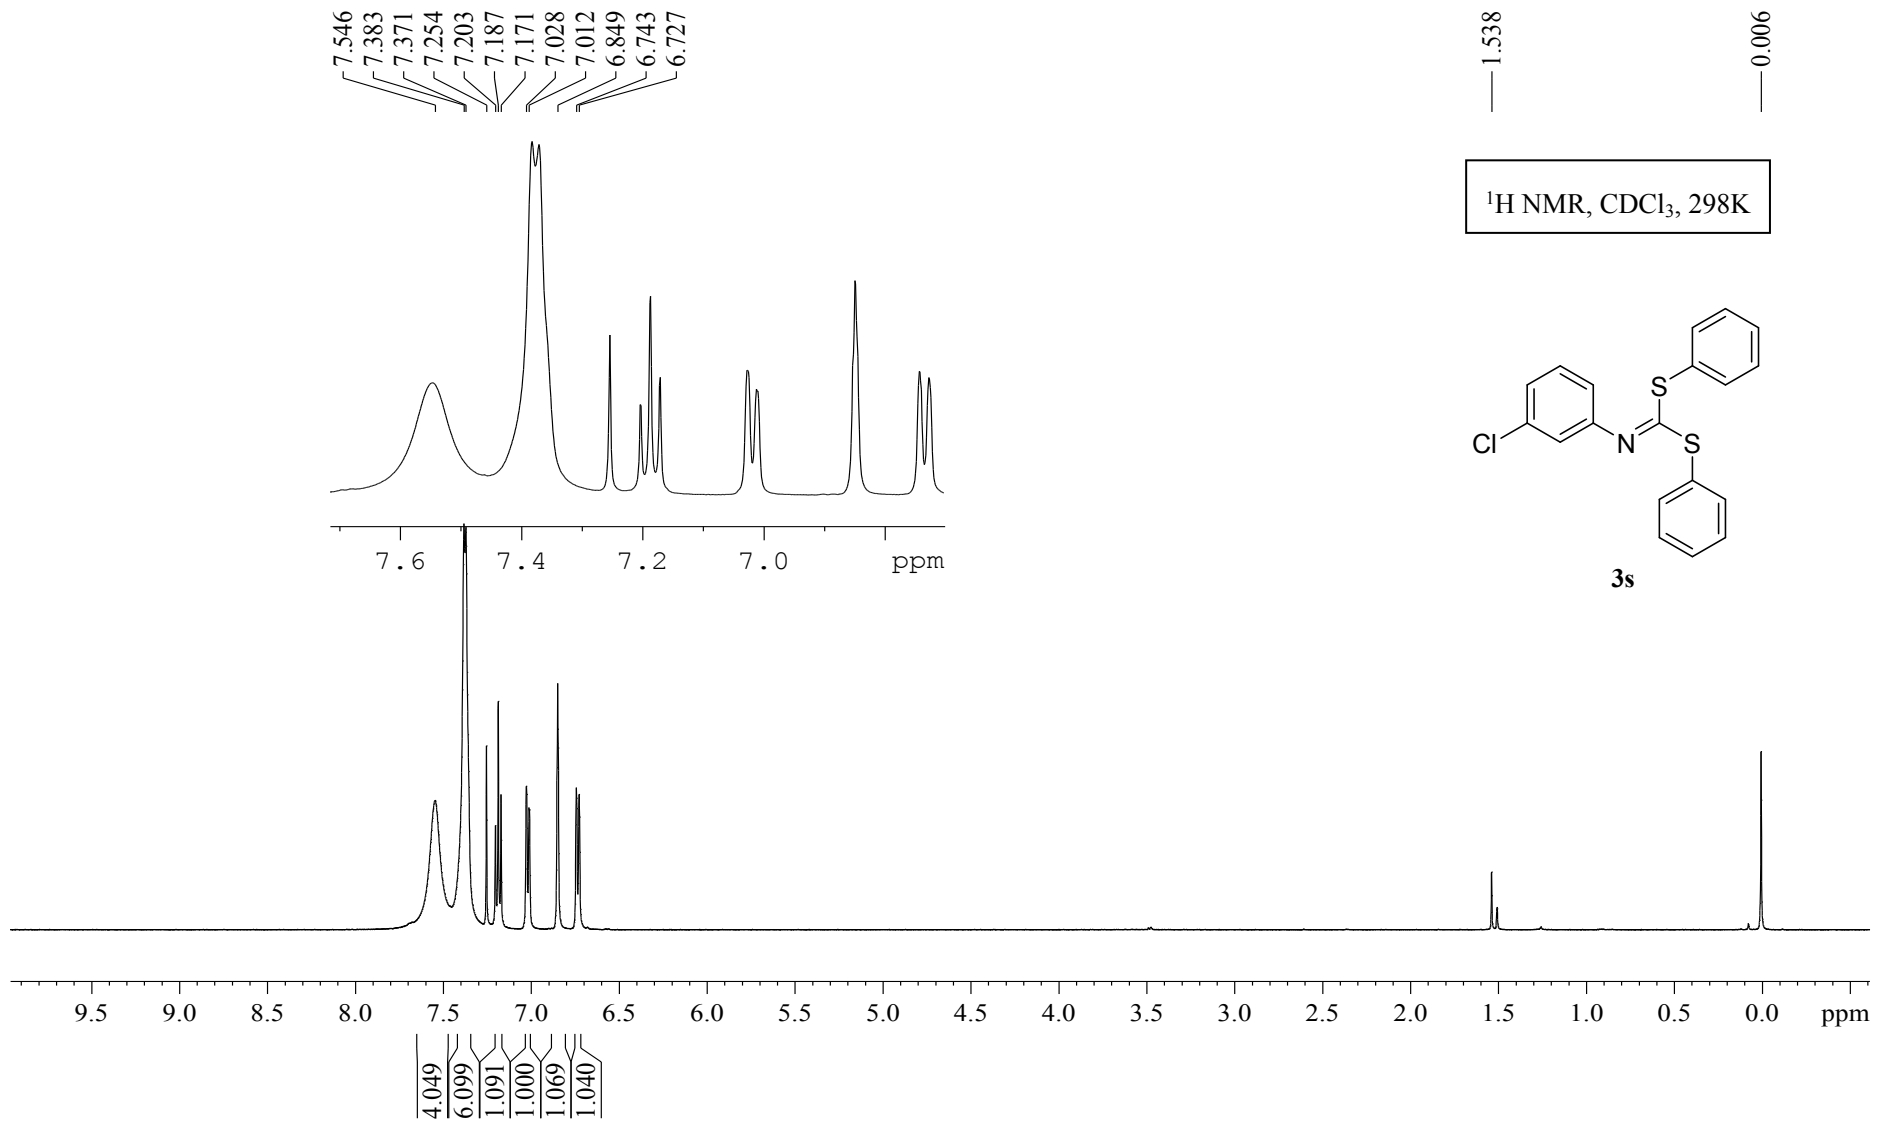

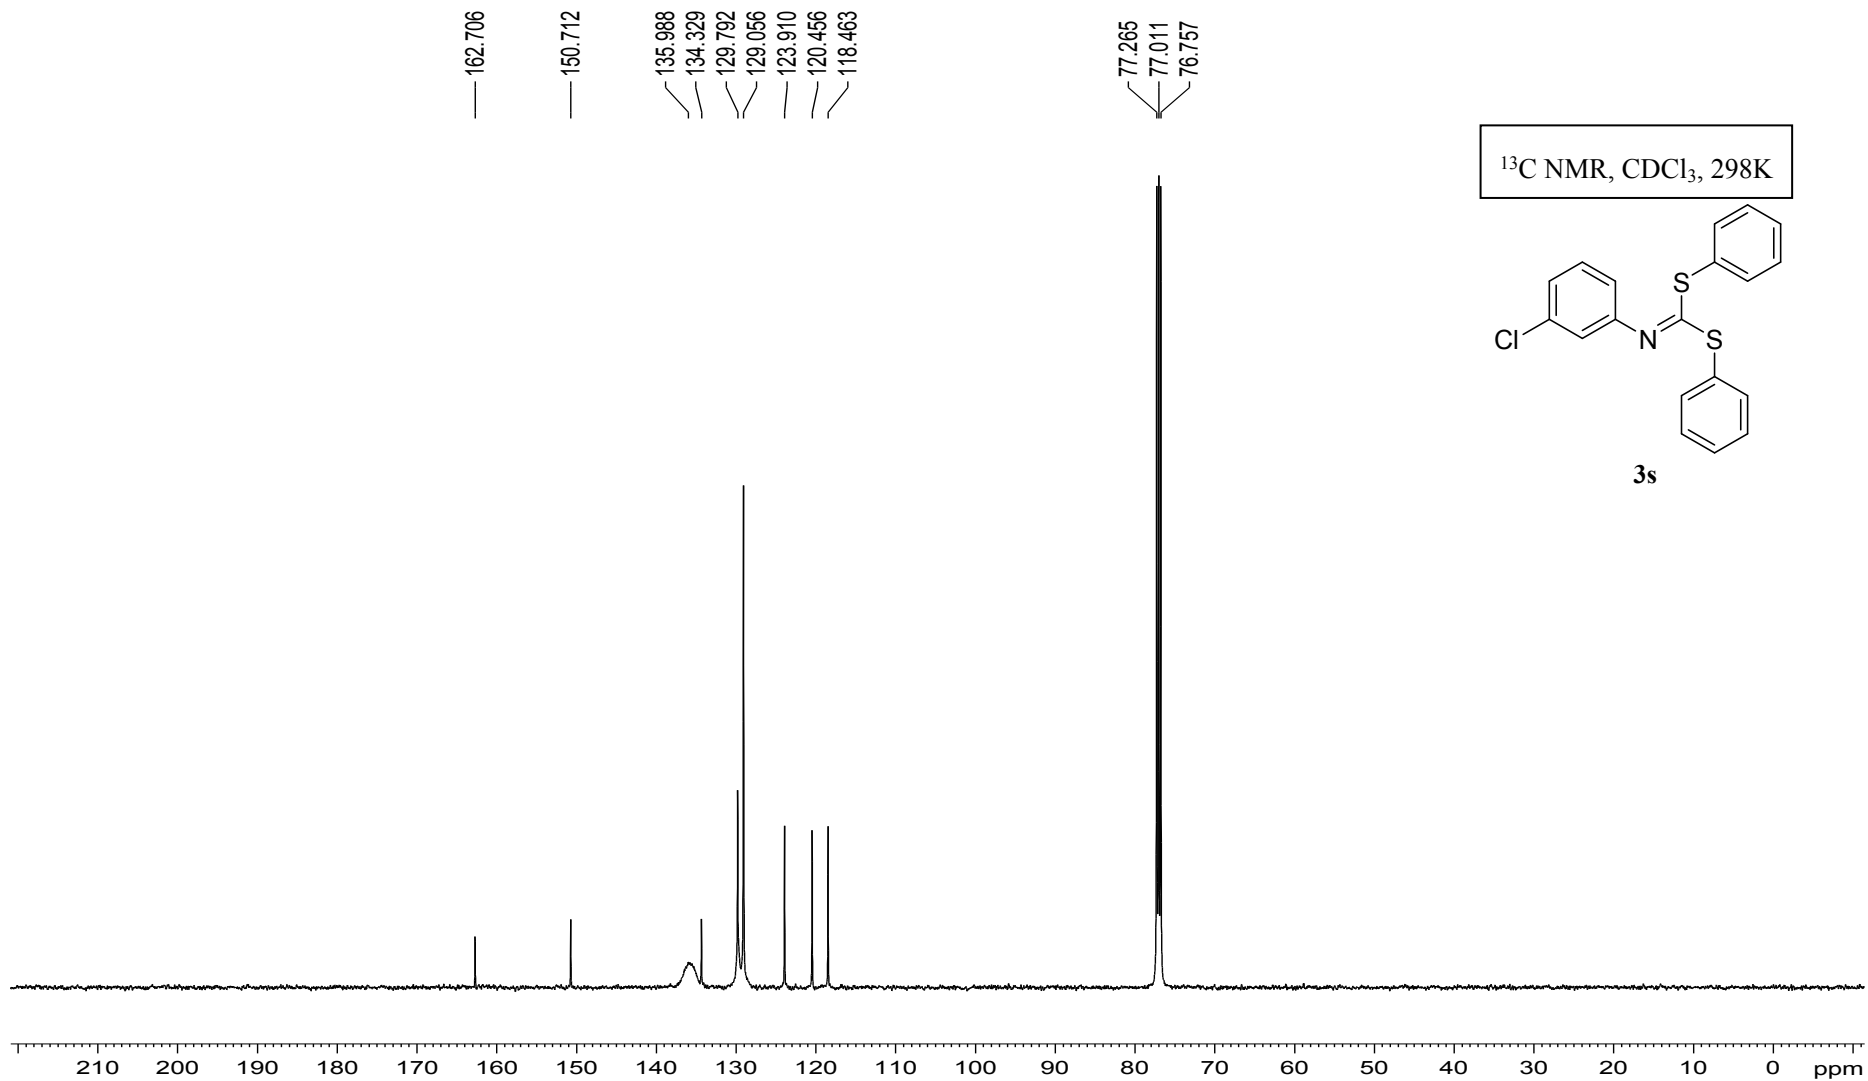

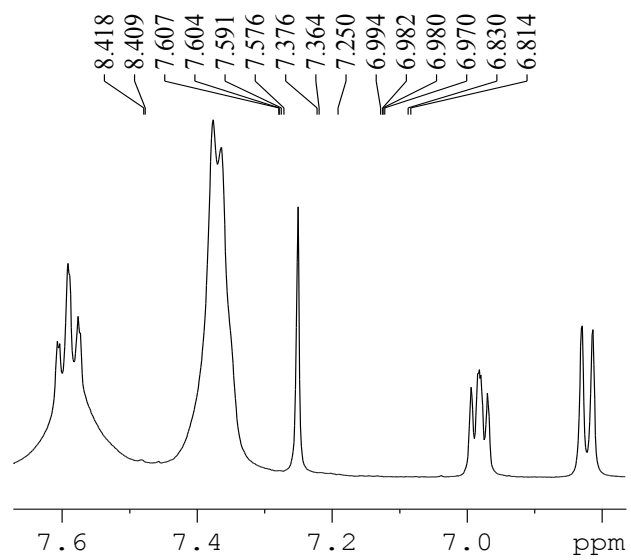

1.596  
-0.009  
**<sup>1</sup>H NMR, CDCl<sub>3</sub>, 298K**

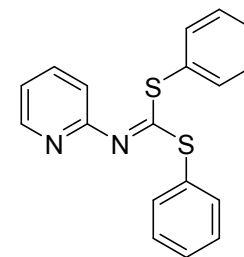

**3t**

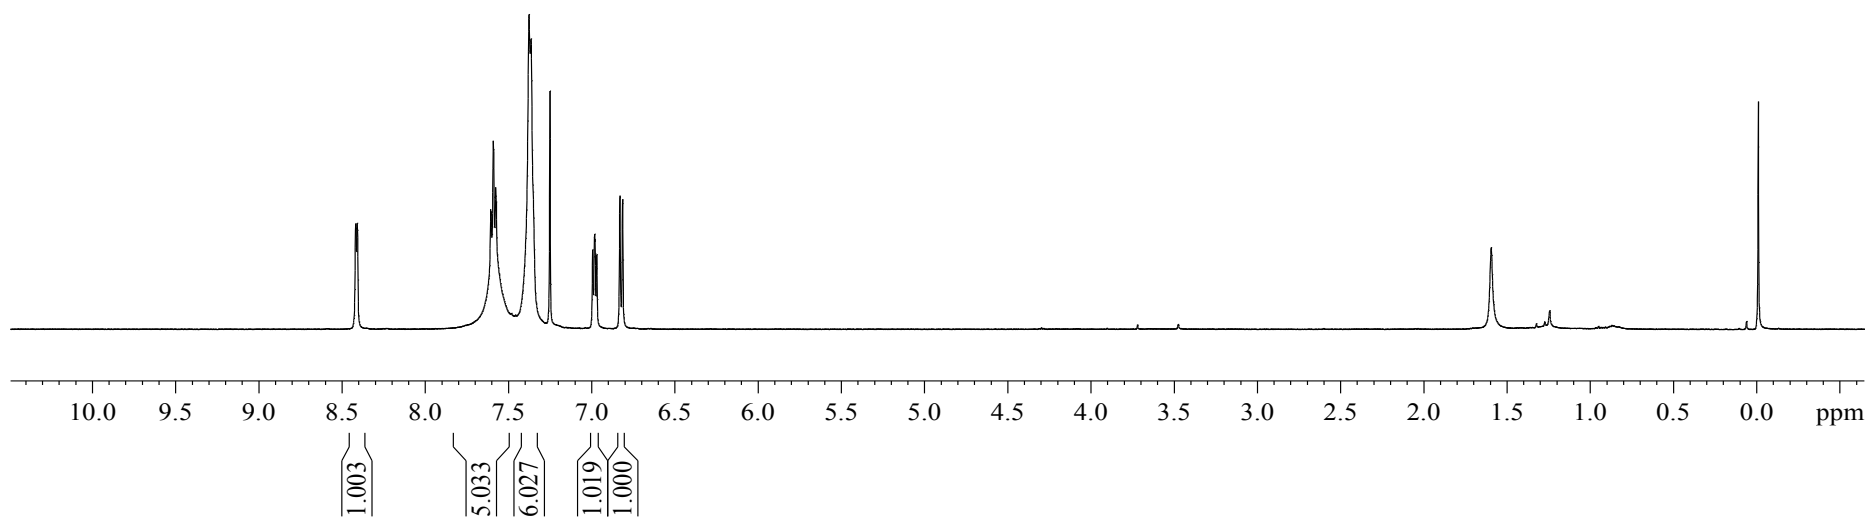



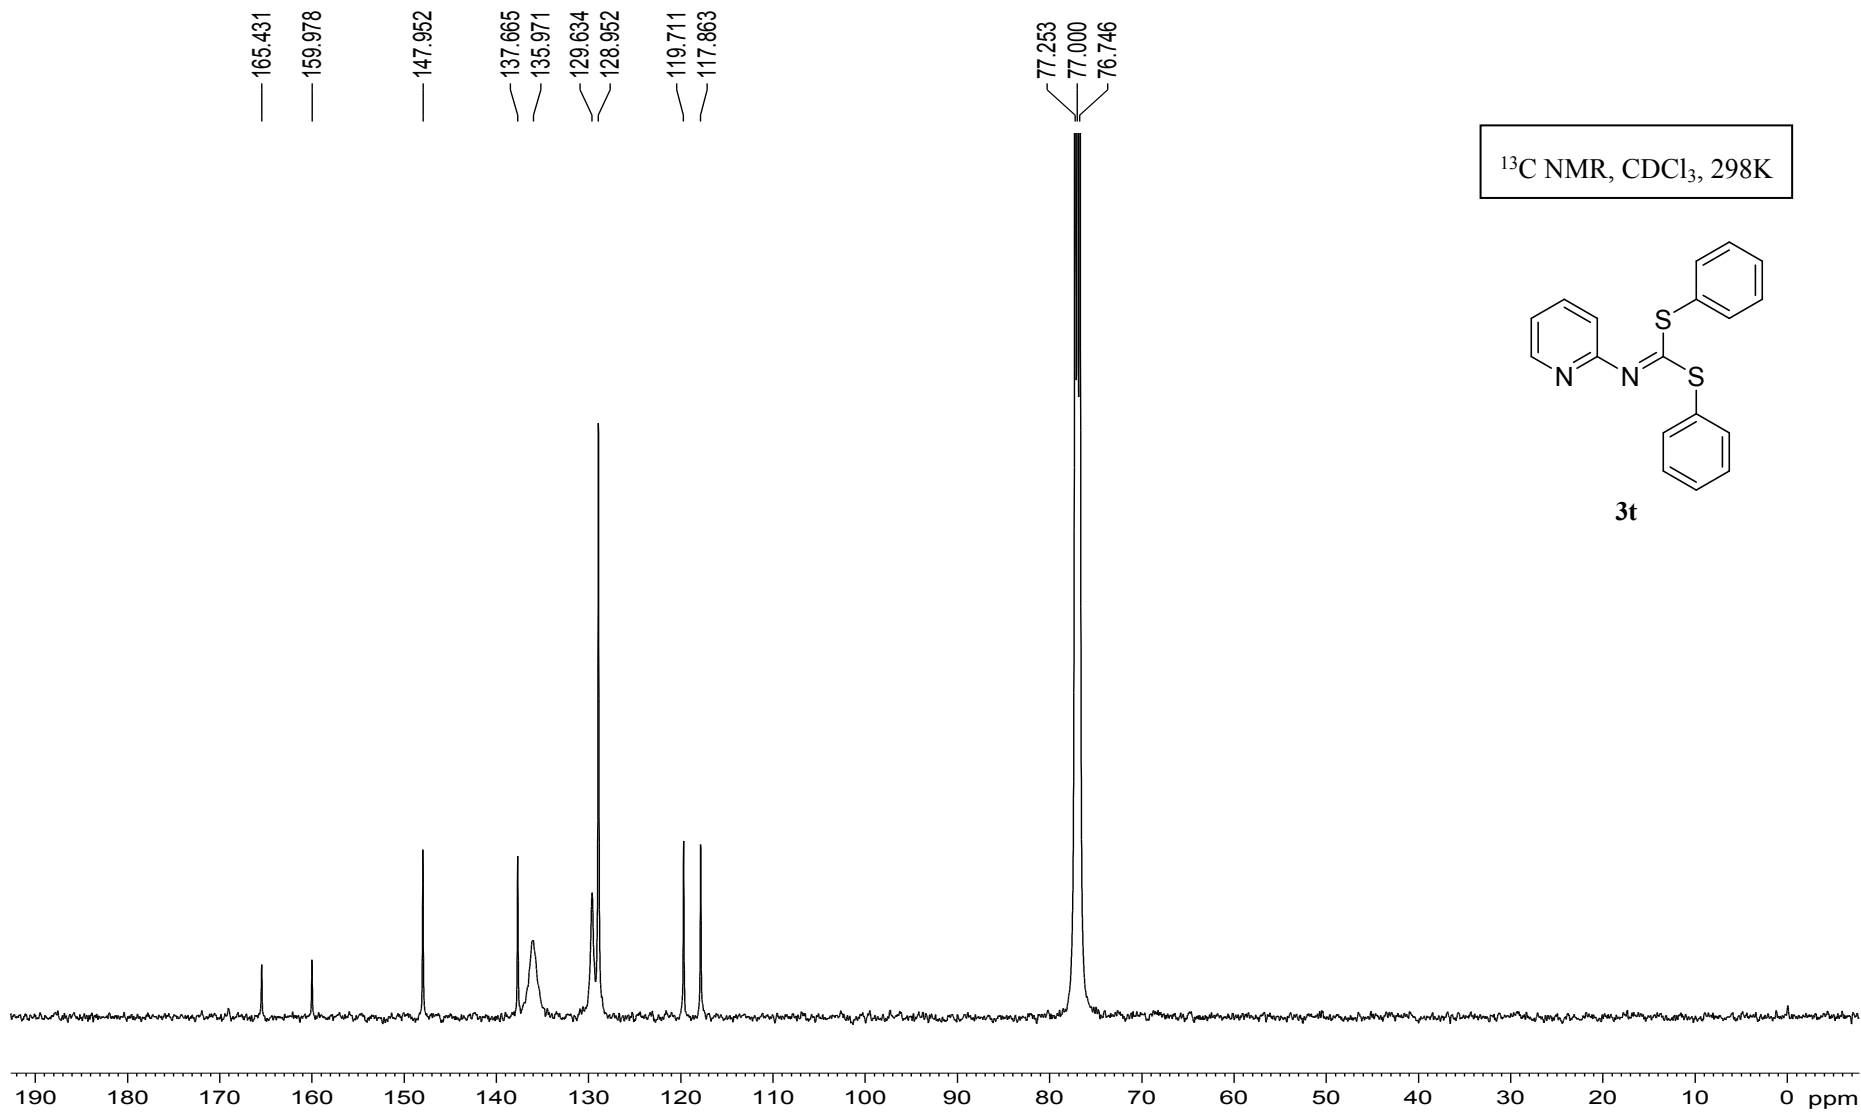

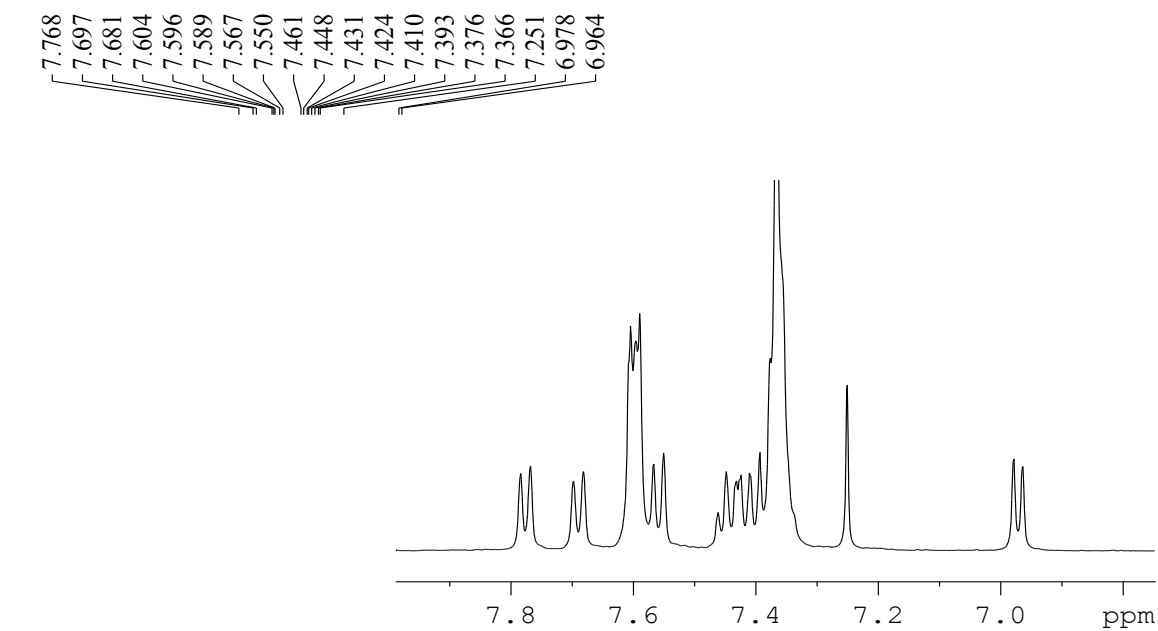

1.528  
-0.001

<sup>1</sup>H NMR, CDCl<sub>3</sub>, 298K

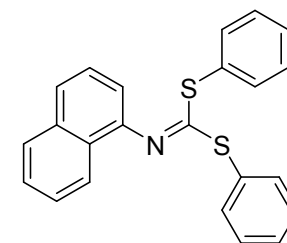

**3u**

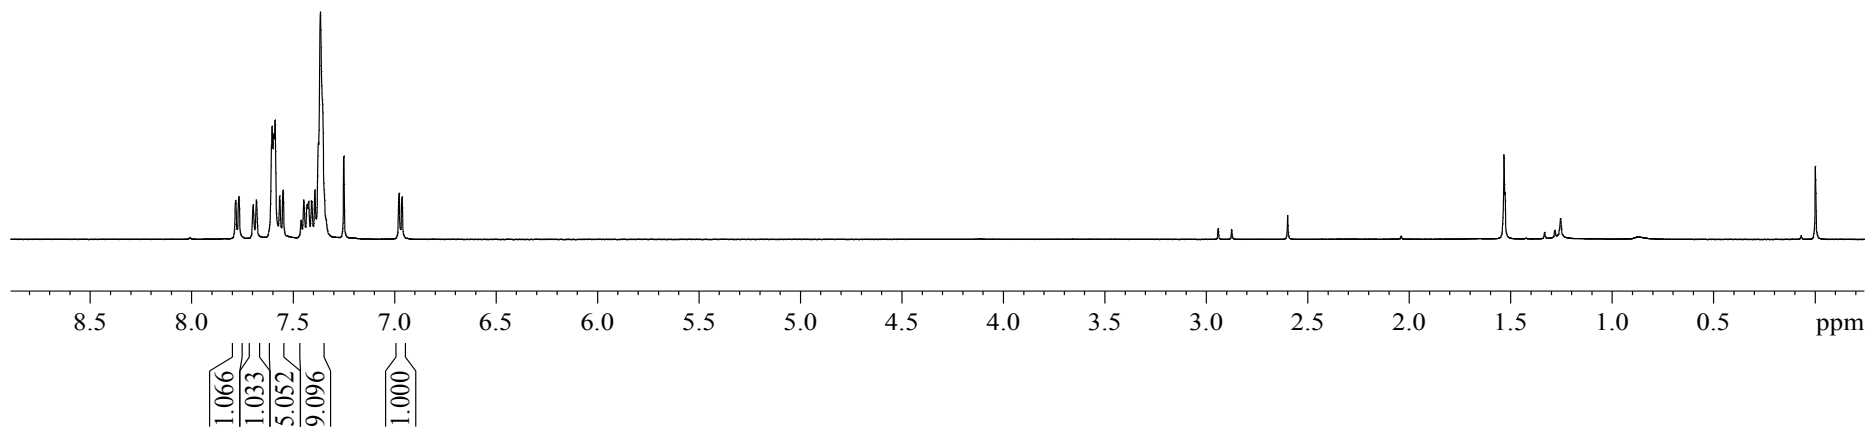

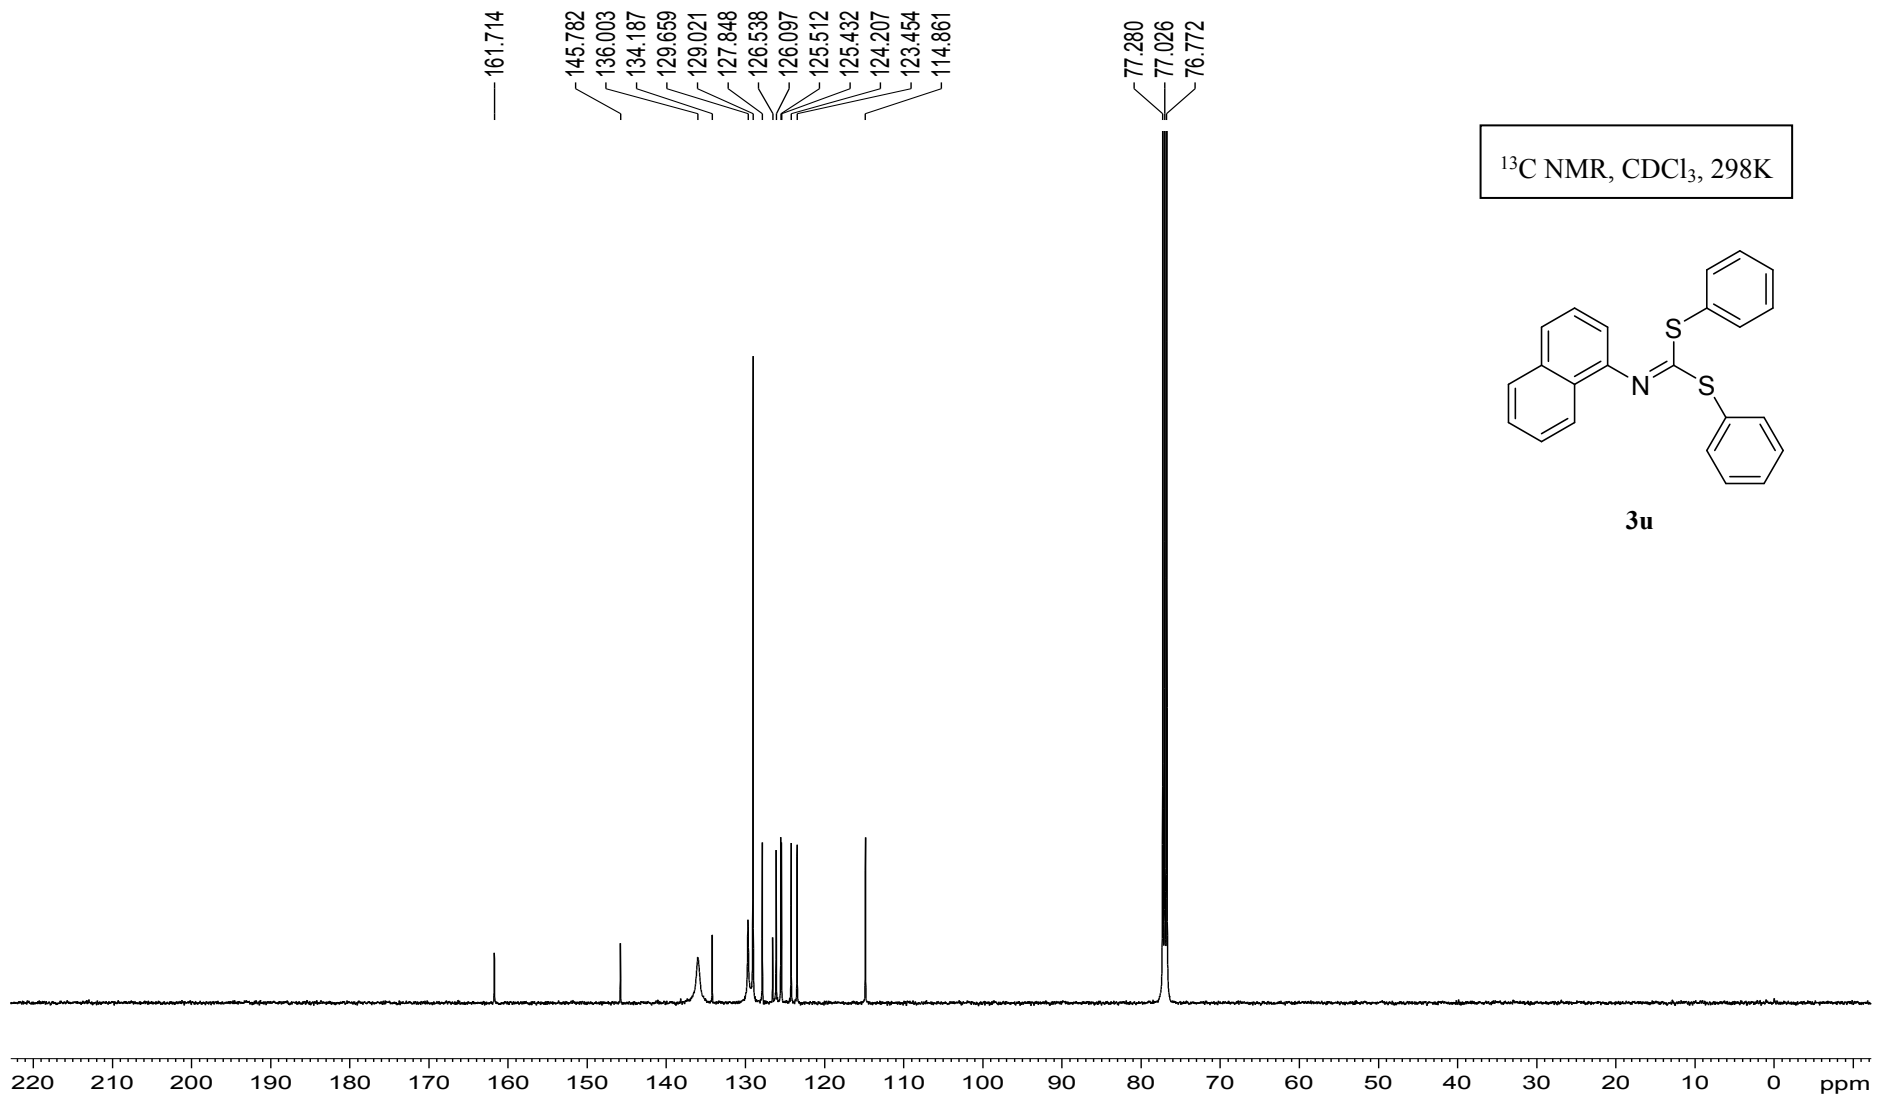

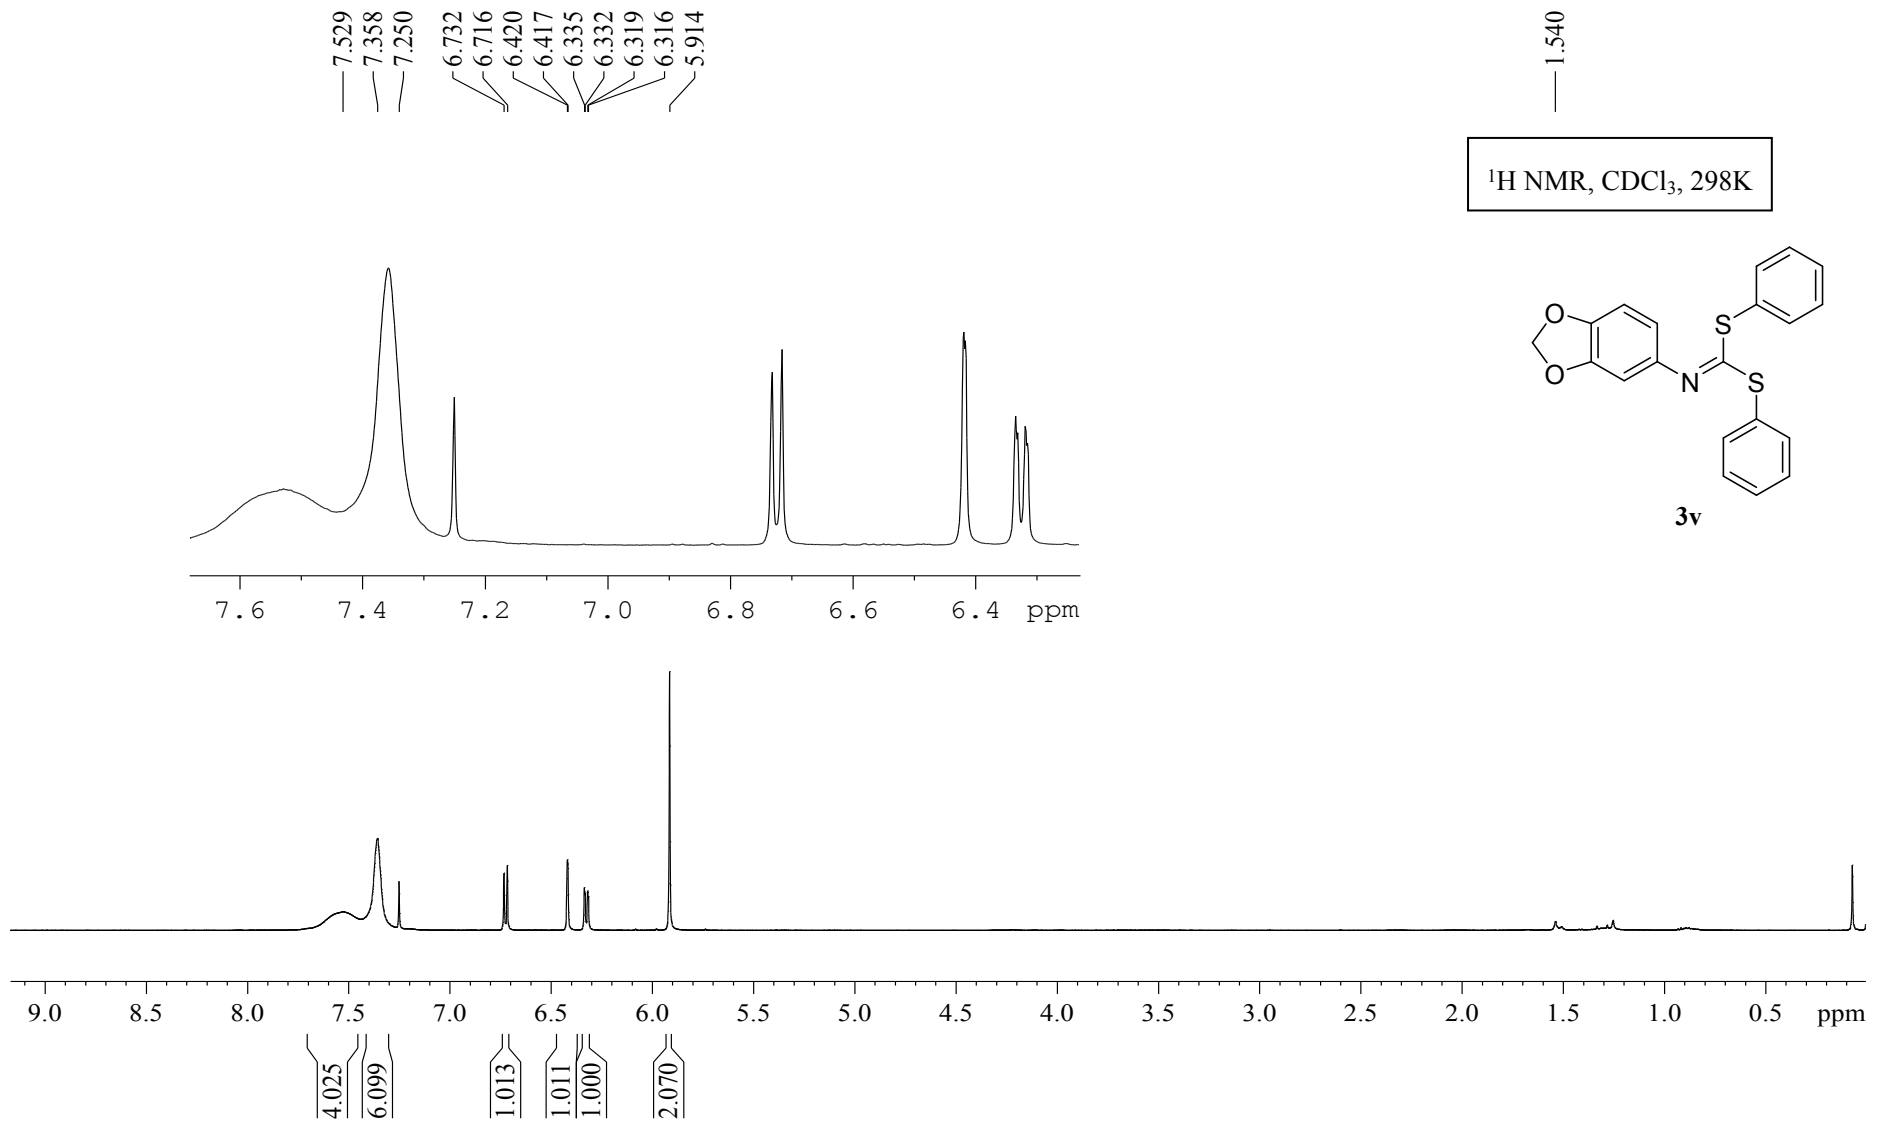

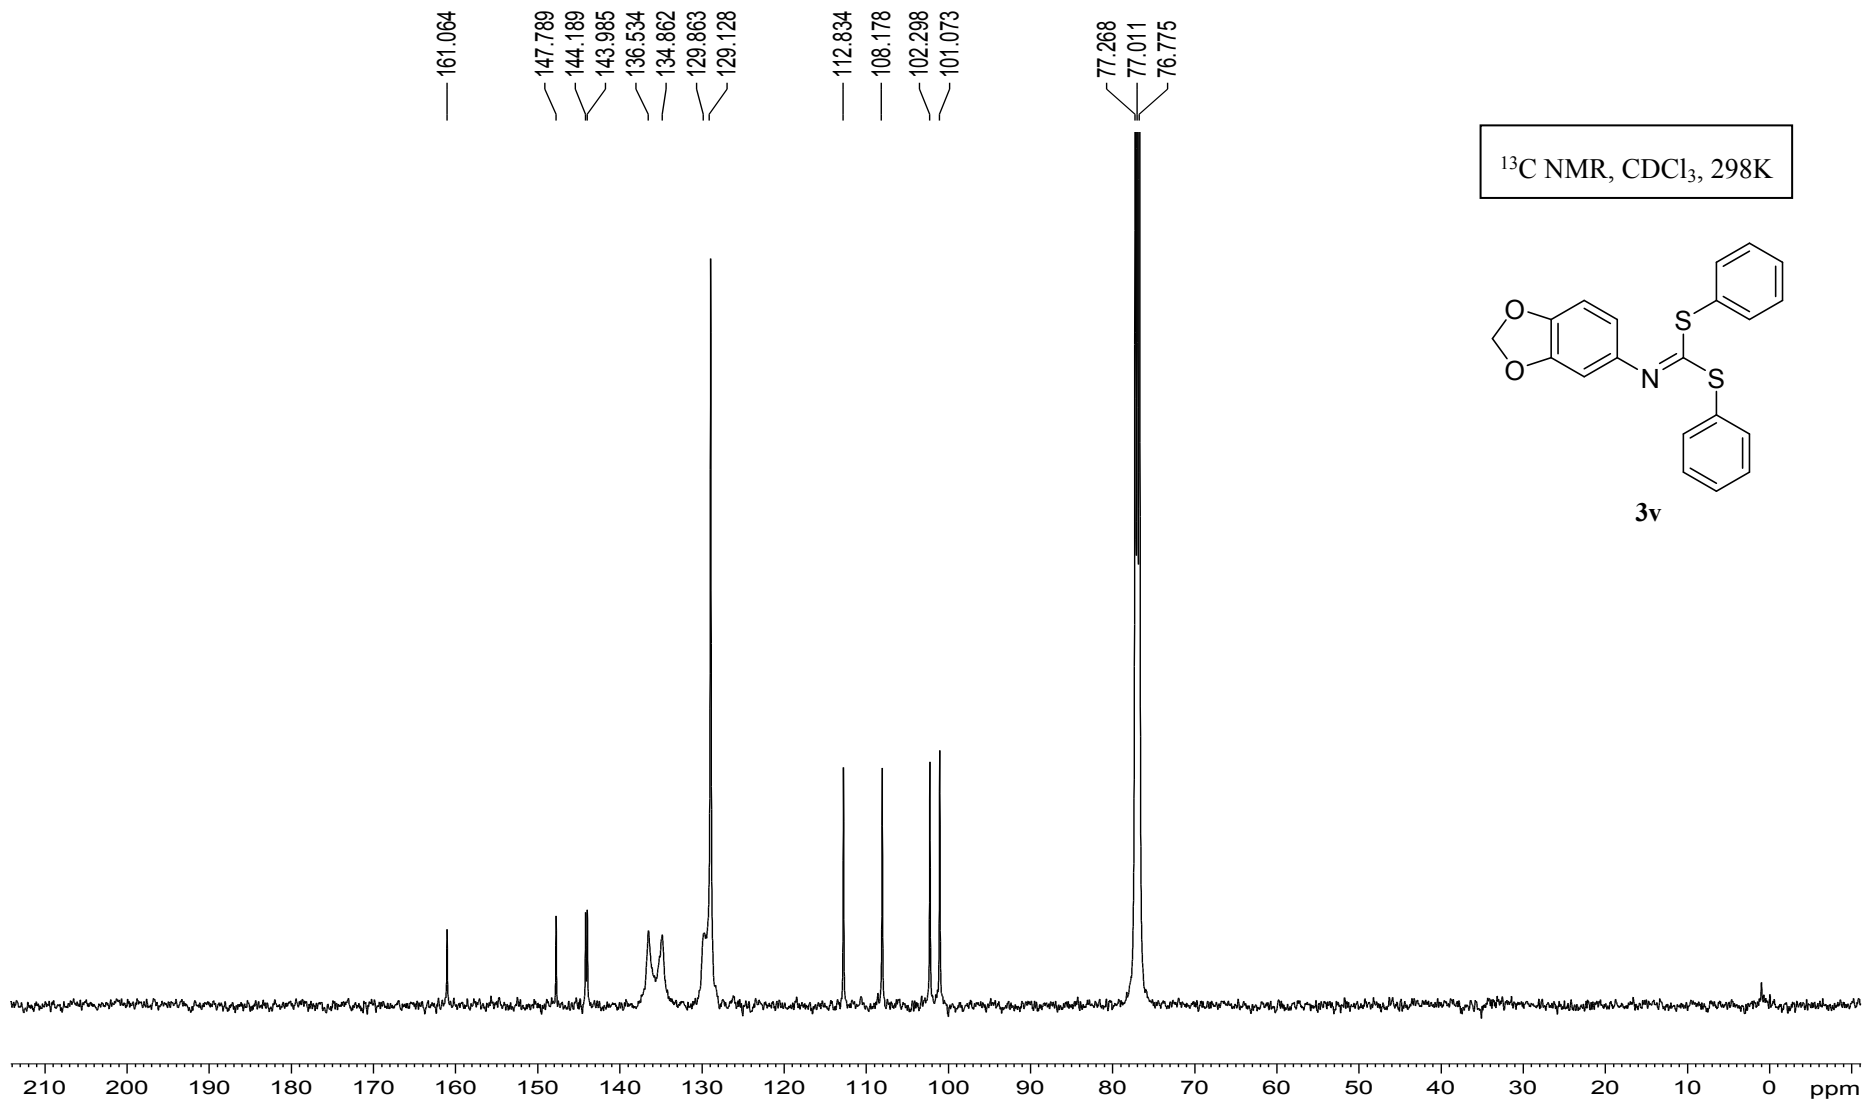

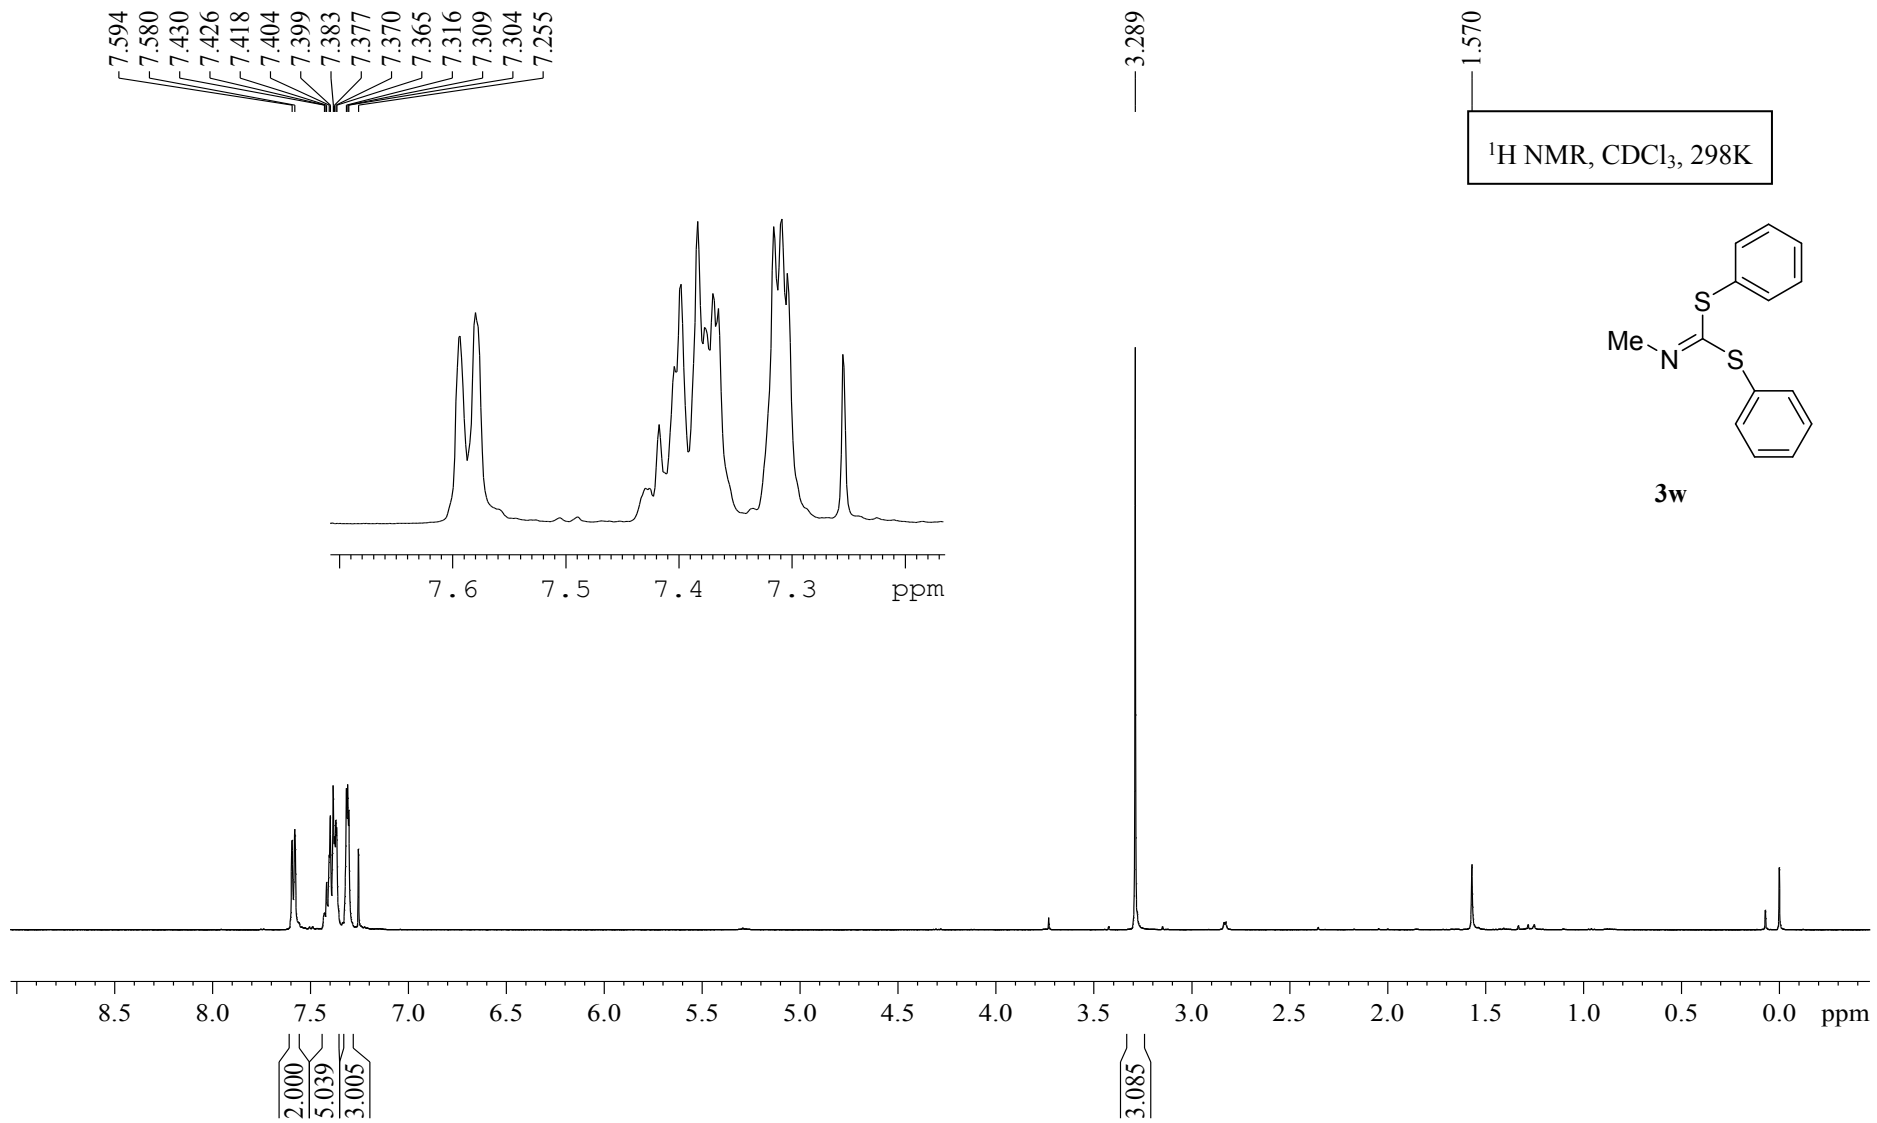

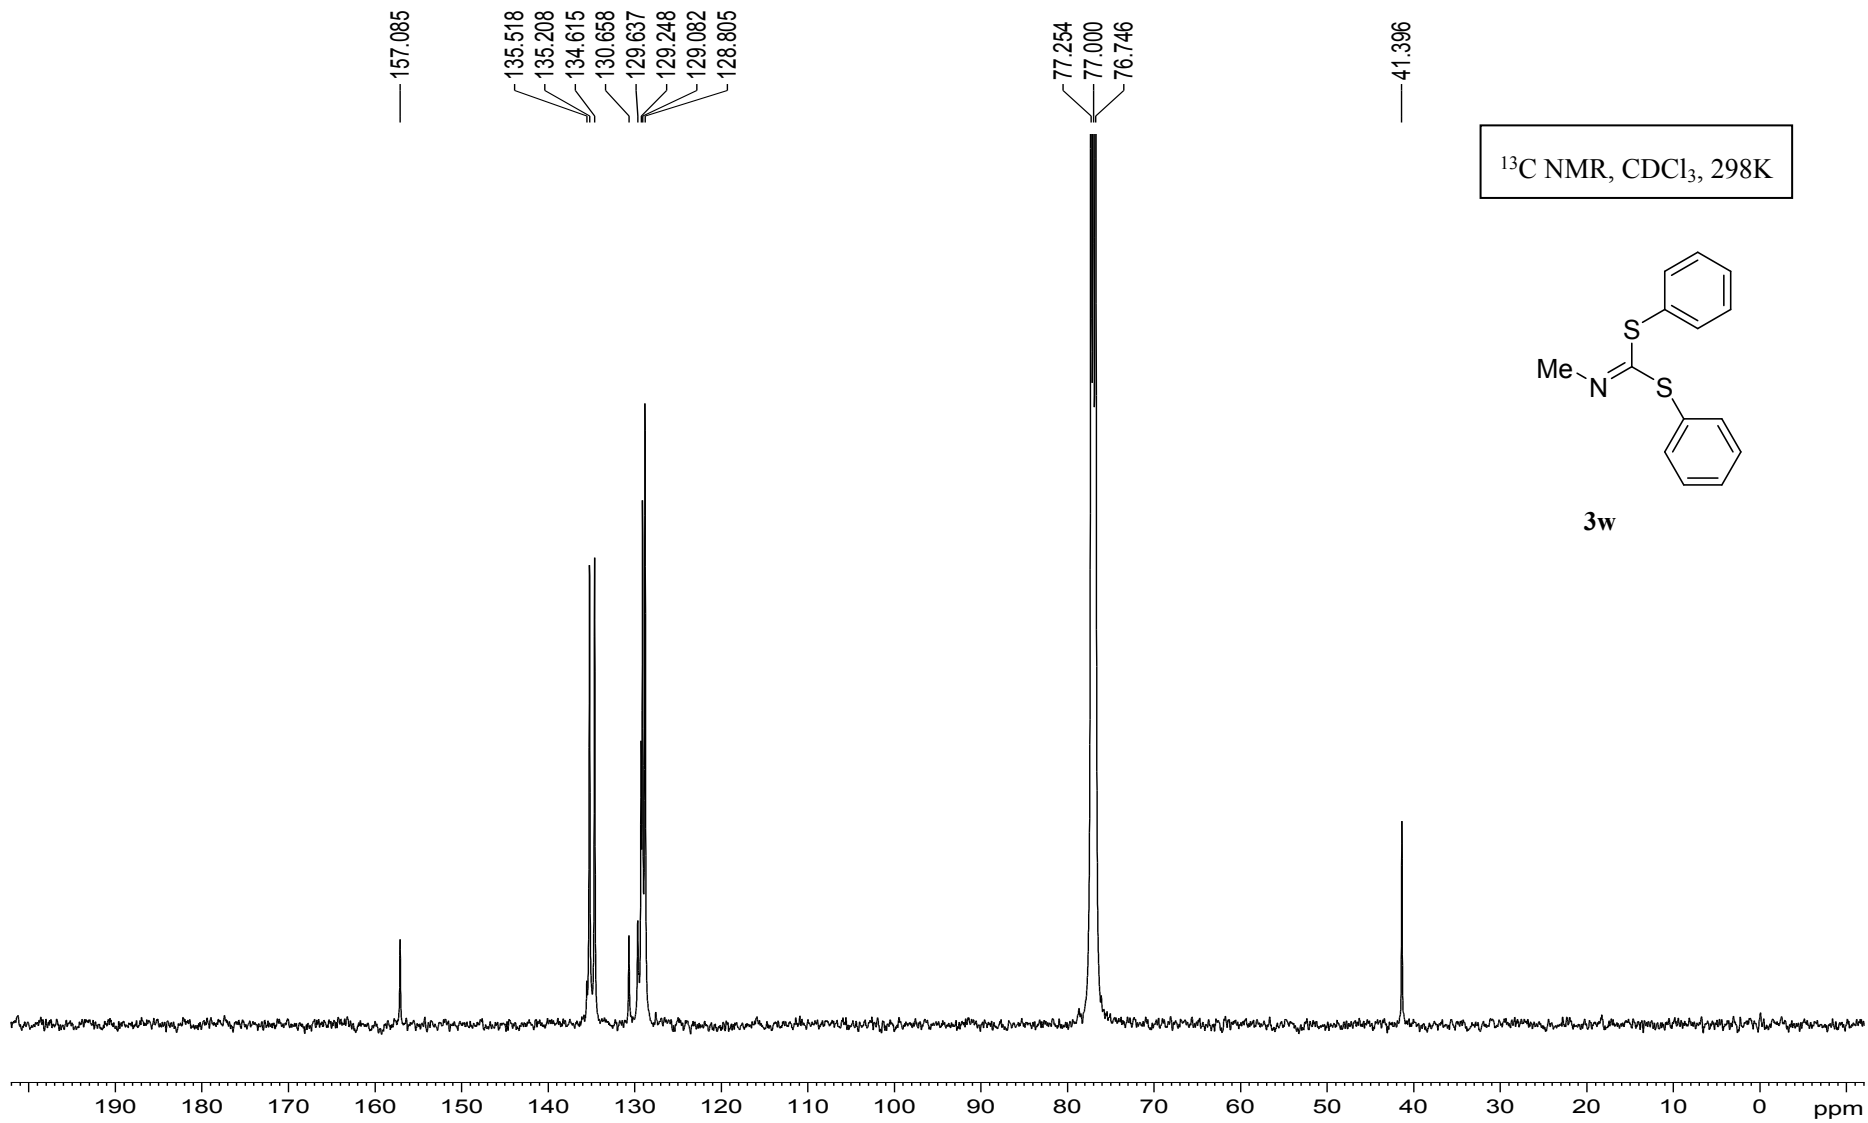

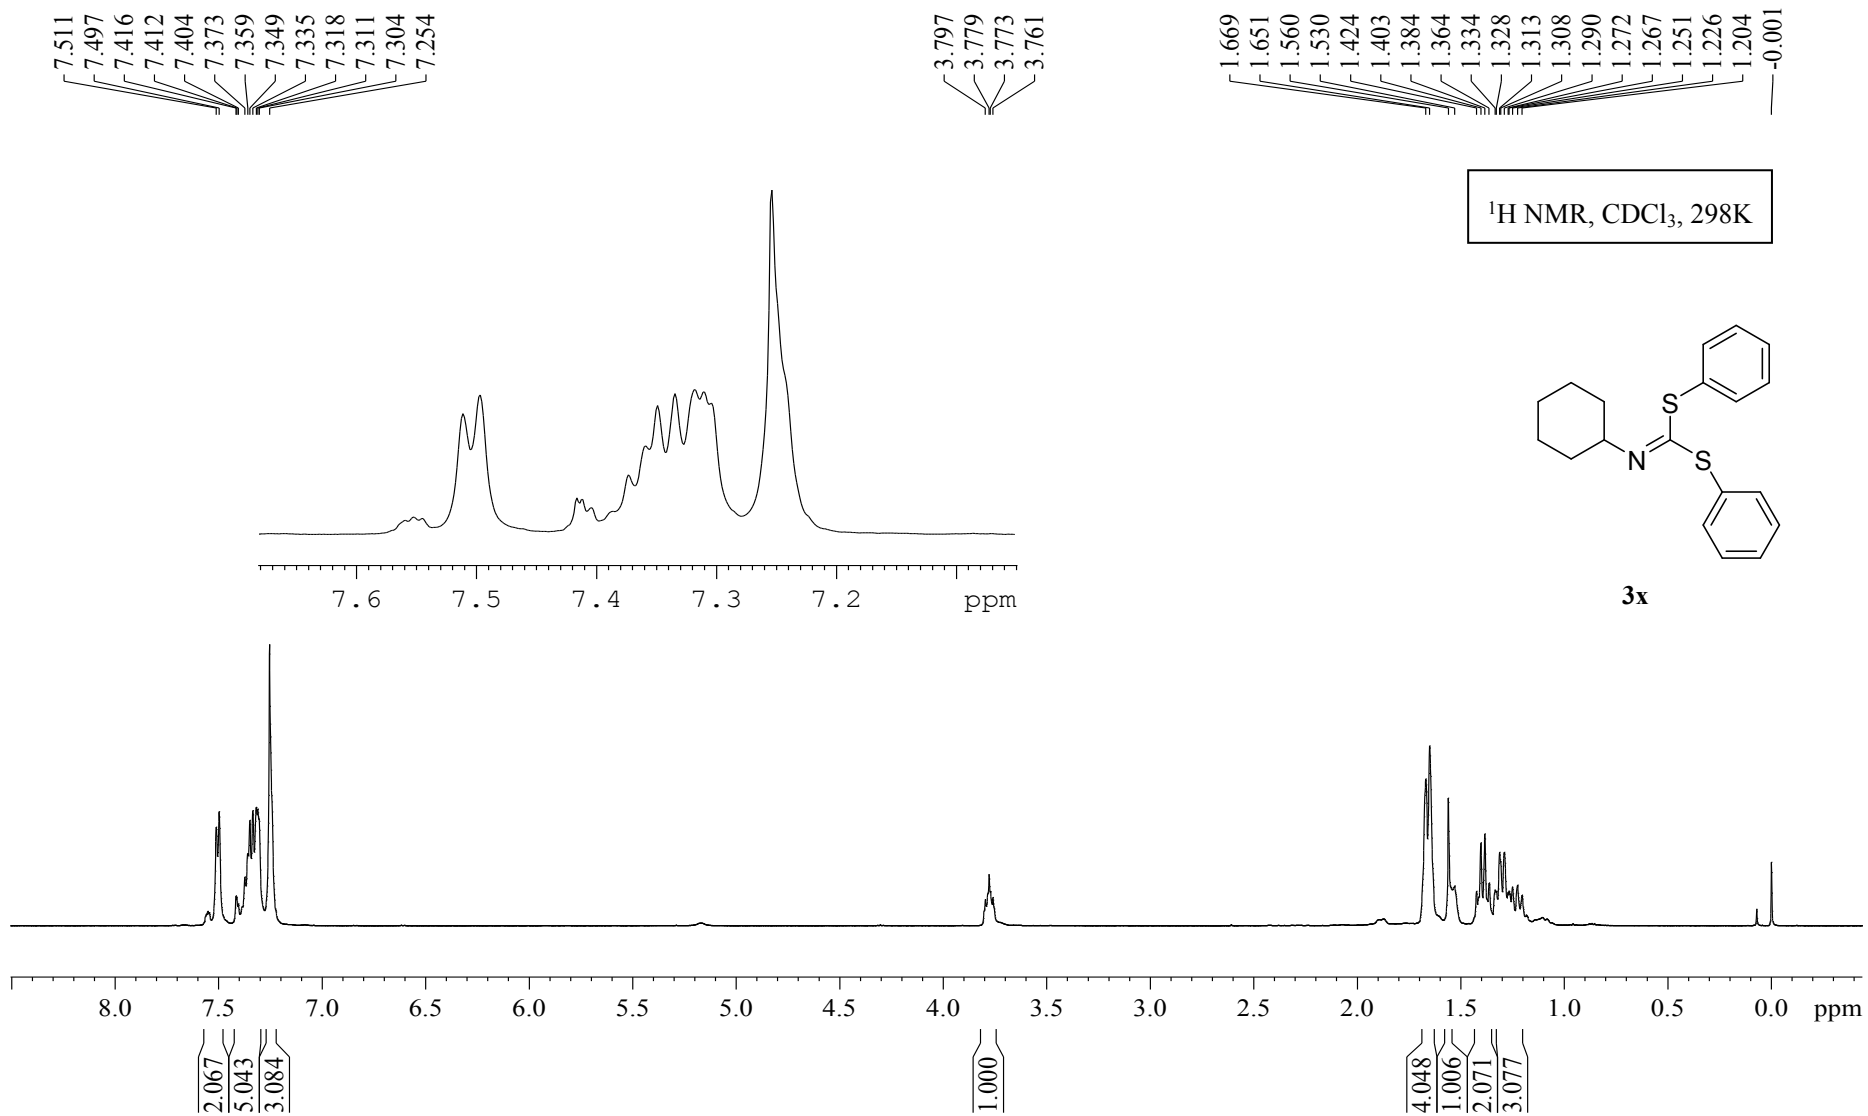



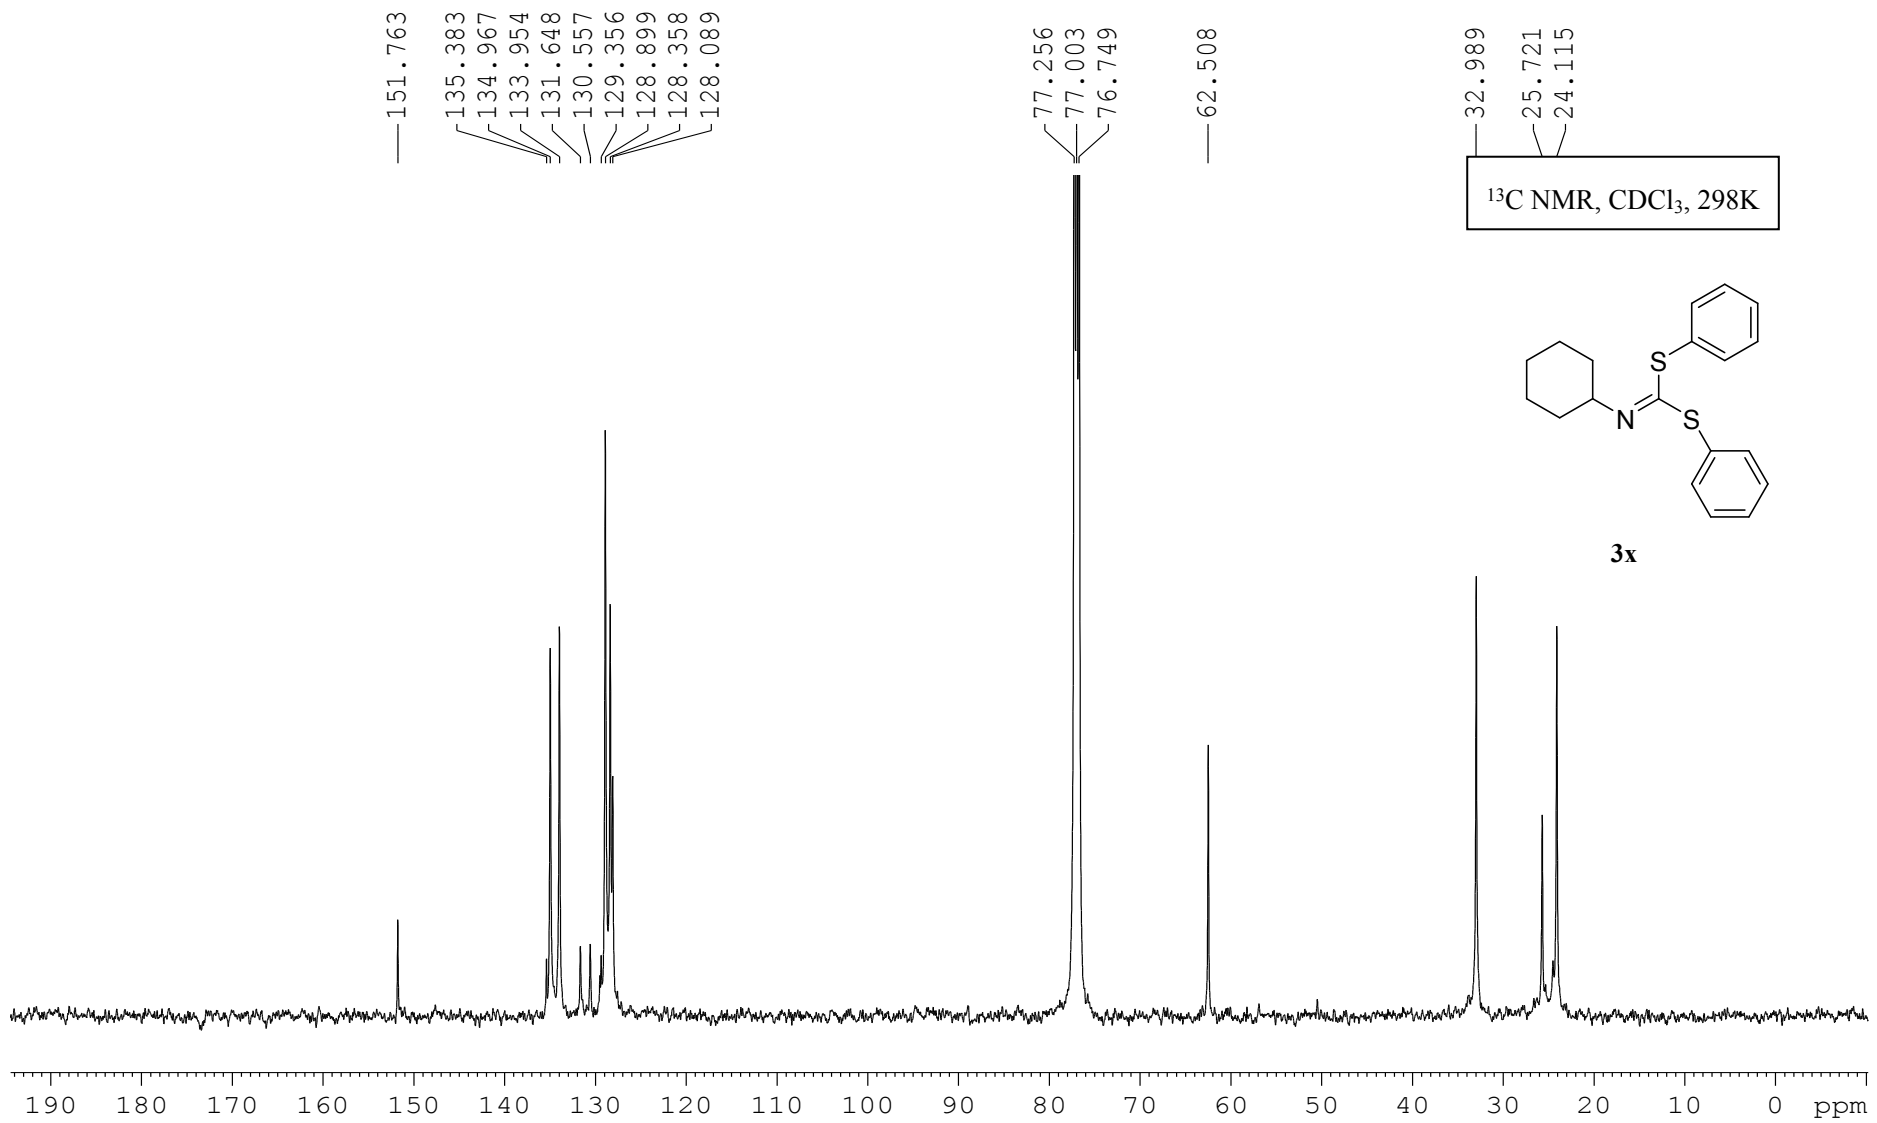

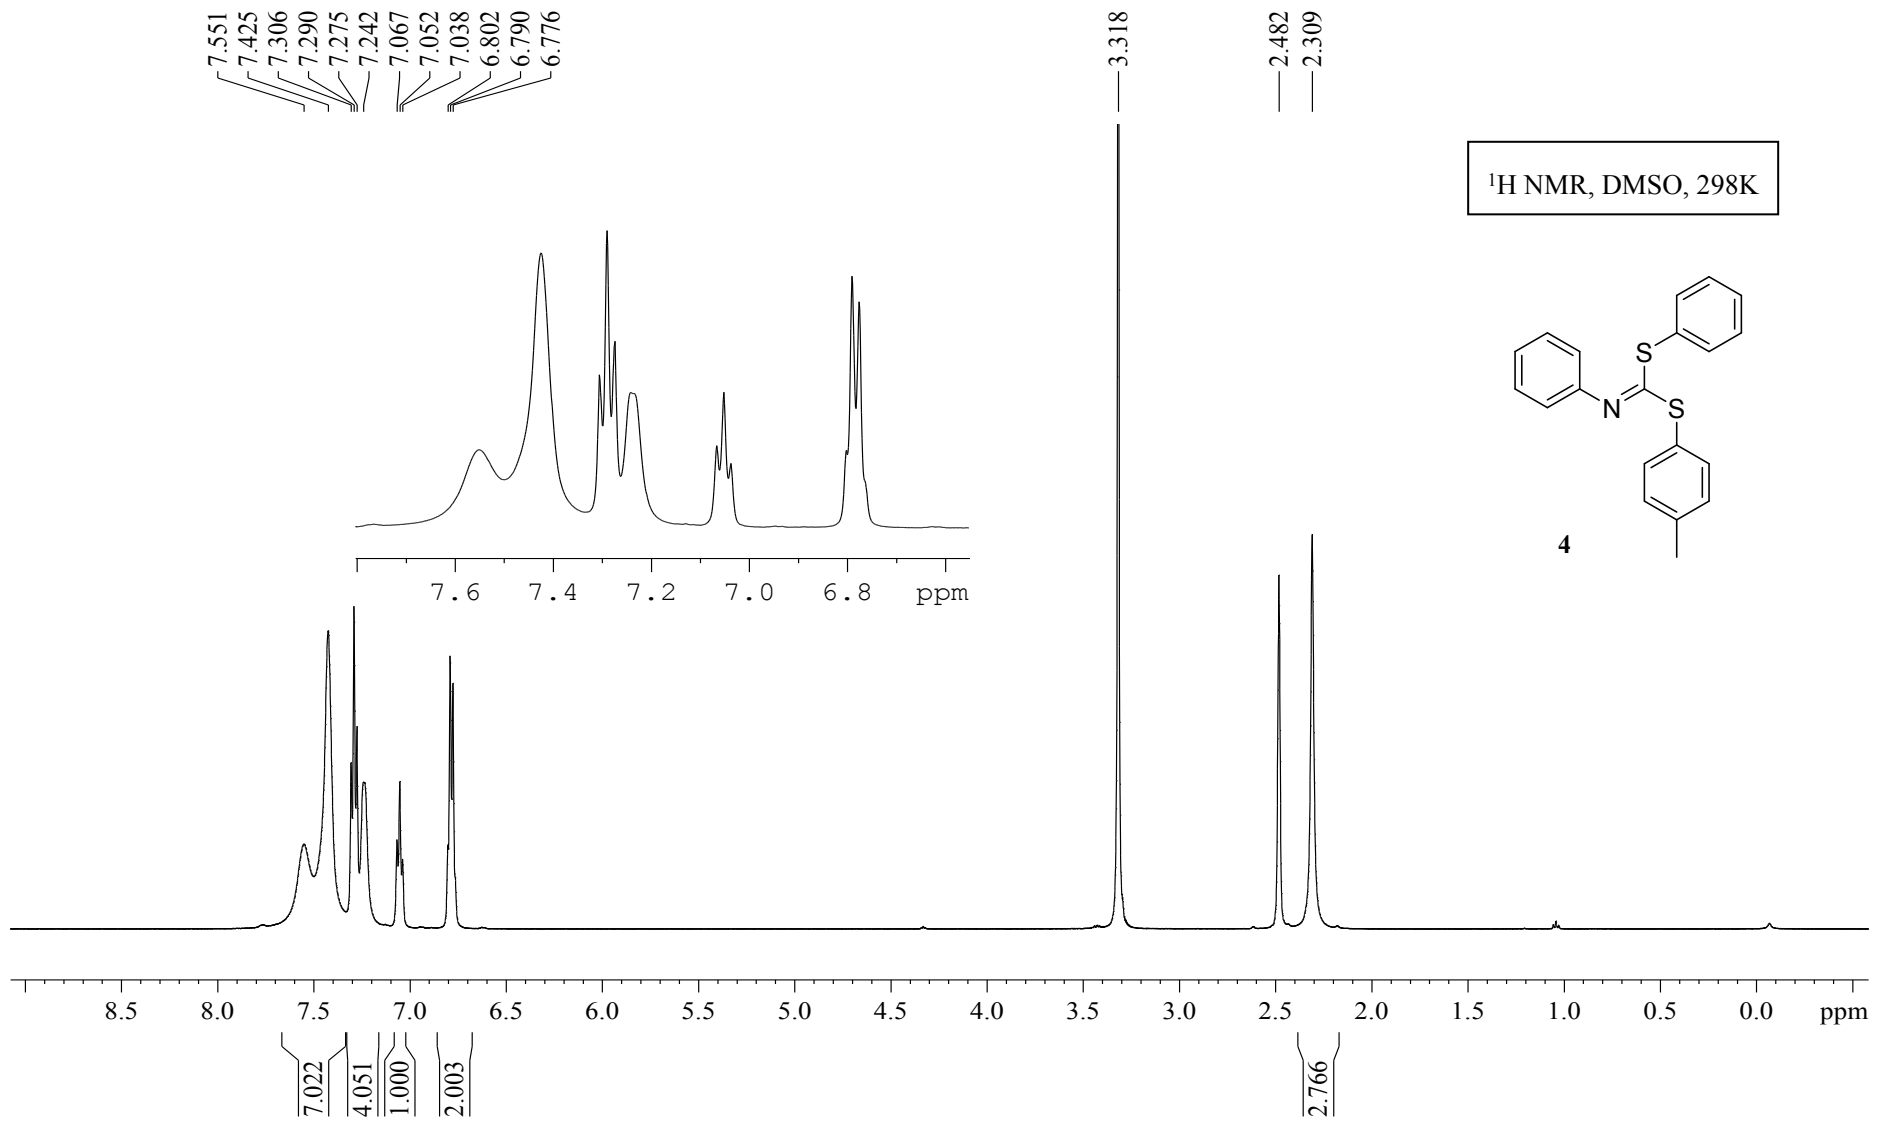

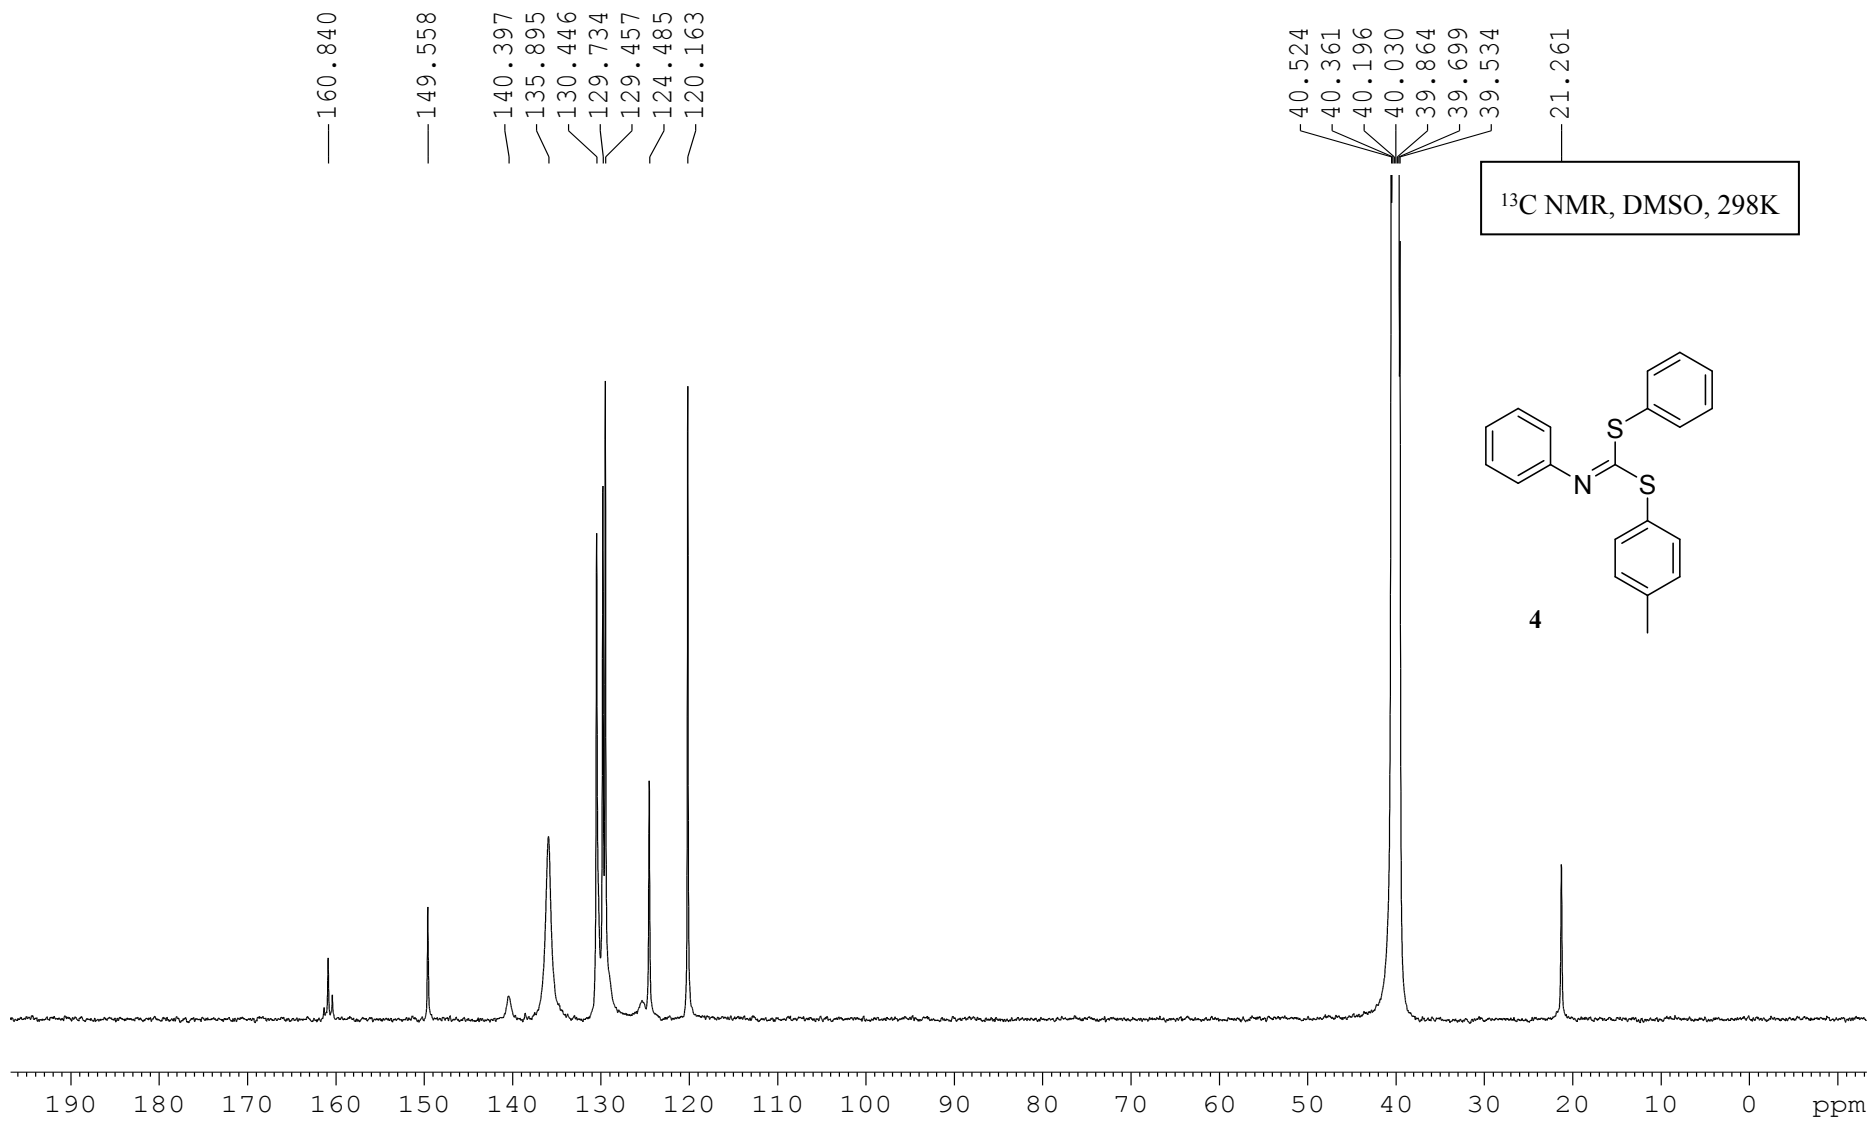

7.669  
7.440  
7.426  
7.407  
7.391  
7.352  
7.270  
7.255  
7.243  
7.228  
7.214  
7.145  
7.070  
6.991

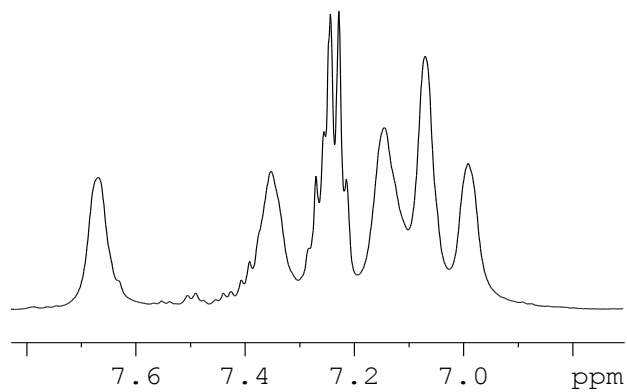

1.558

1.254

-0.000

<sup>1</sup>H NMR, CDCl<sub>3</sub>, 298K

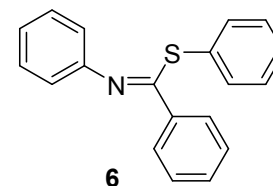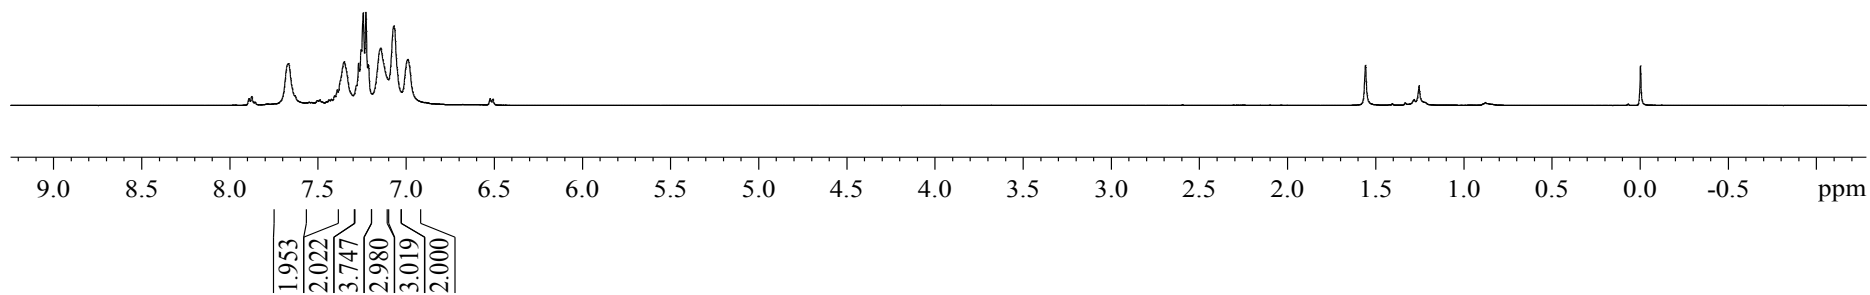

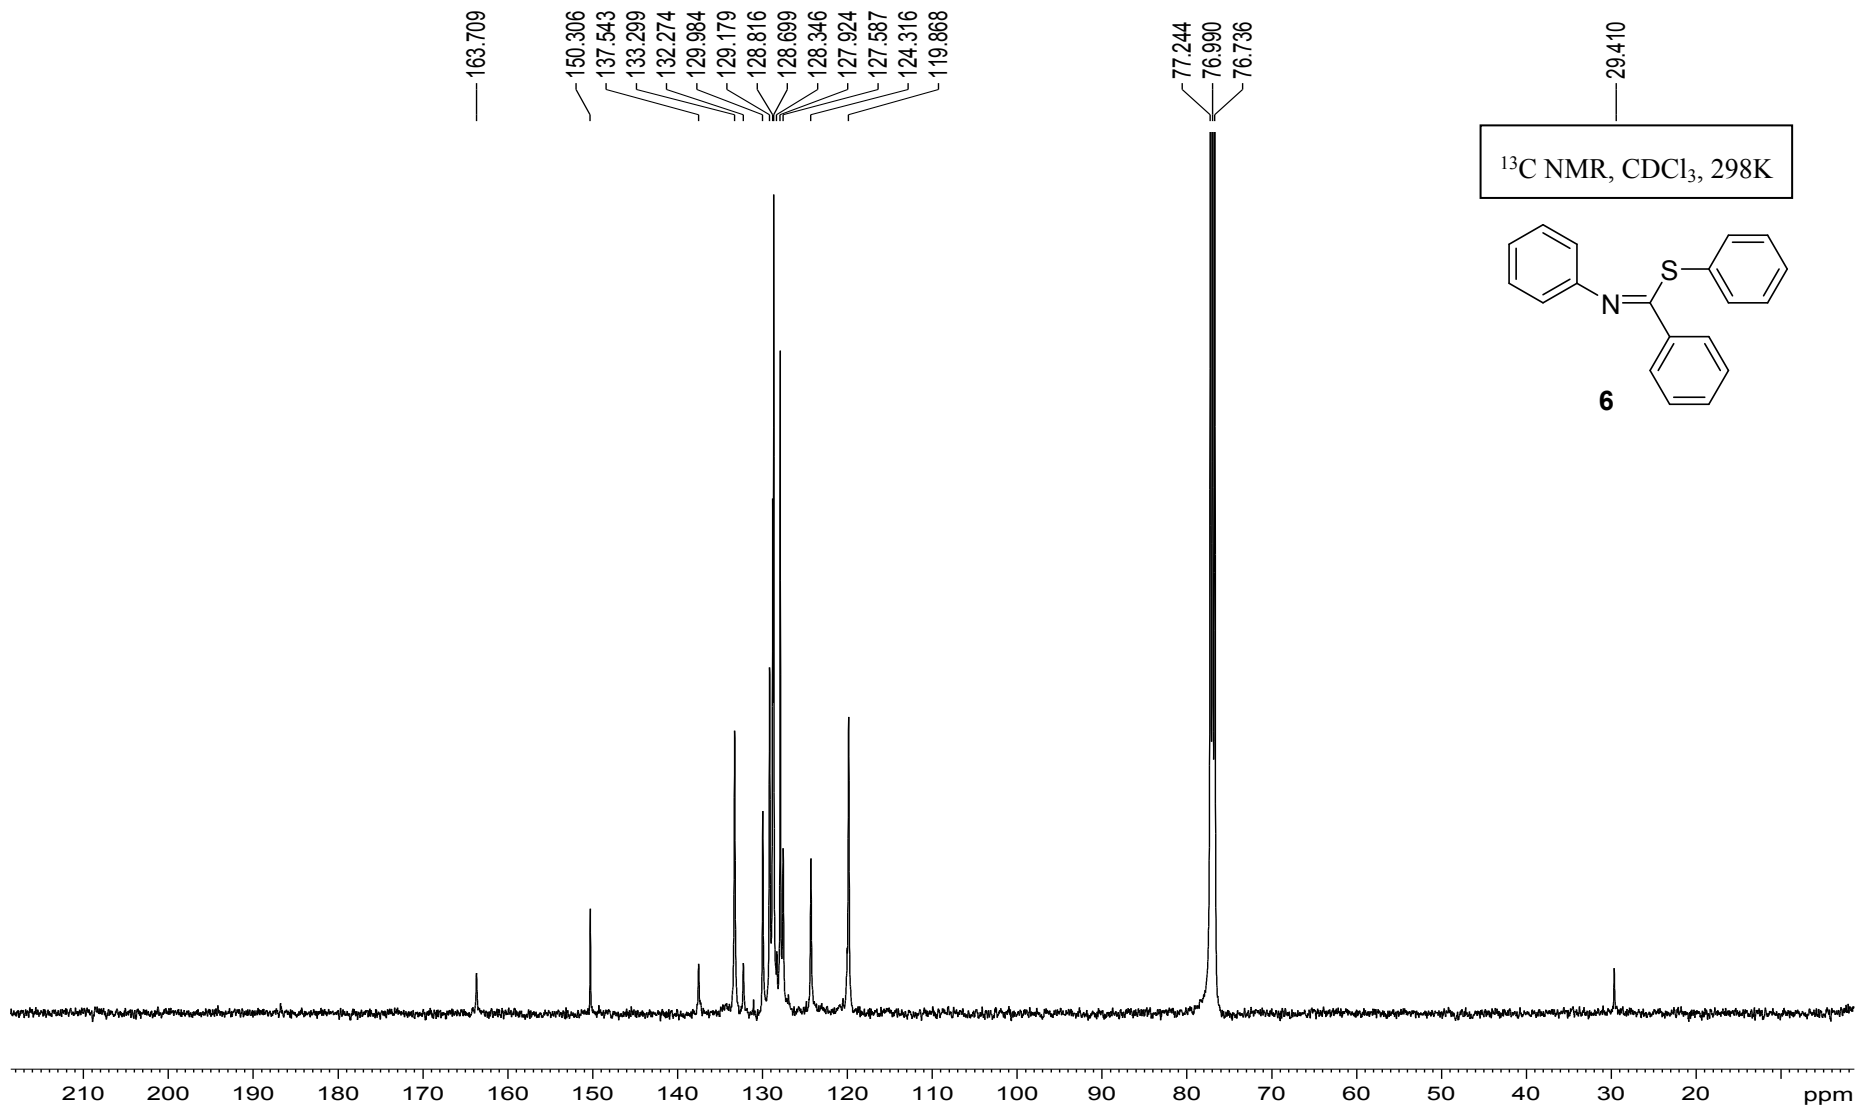

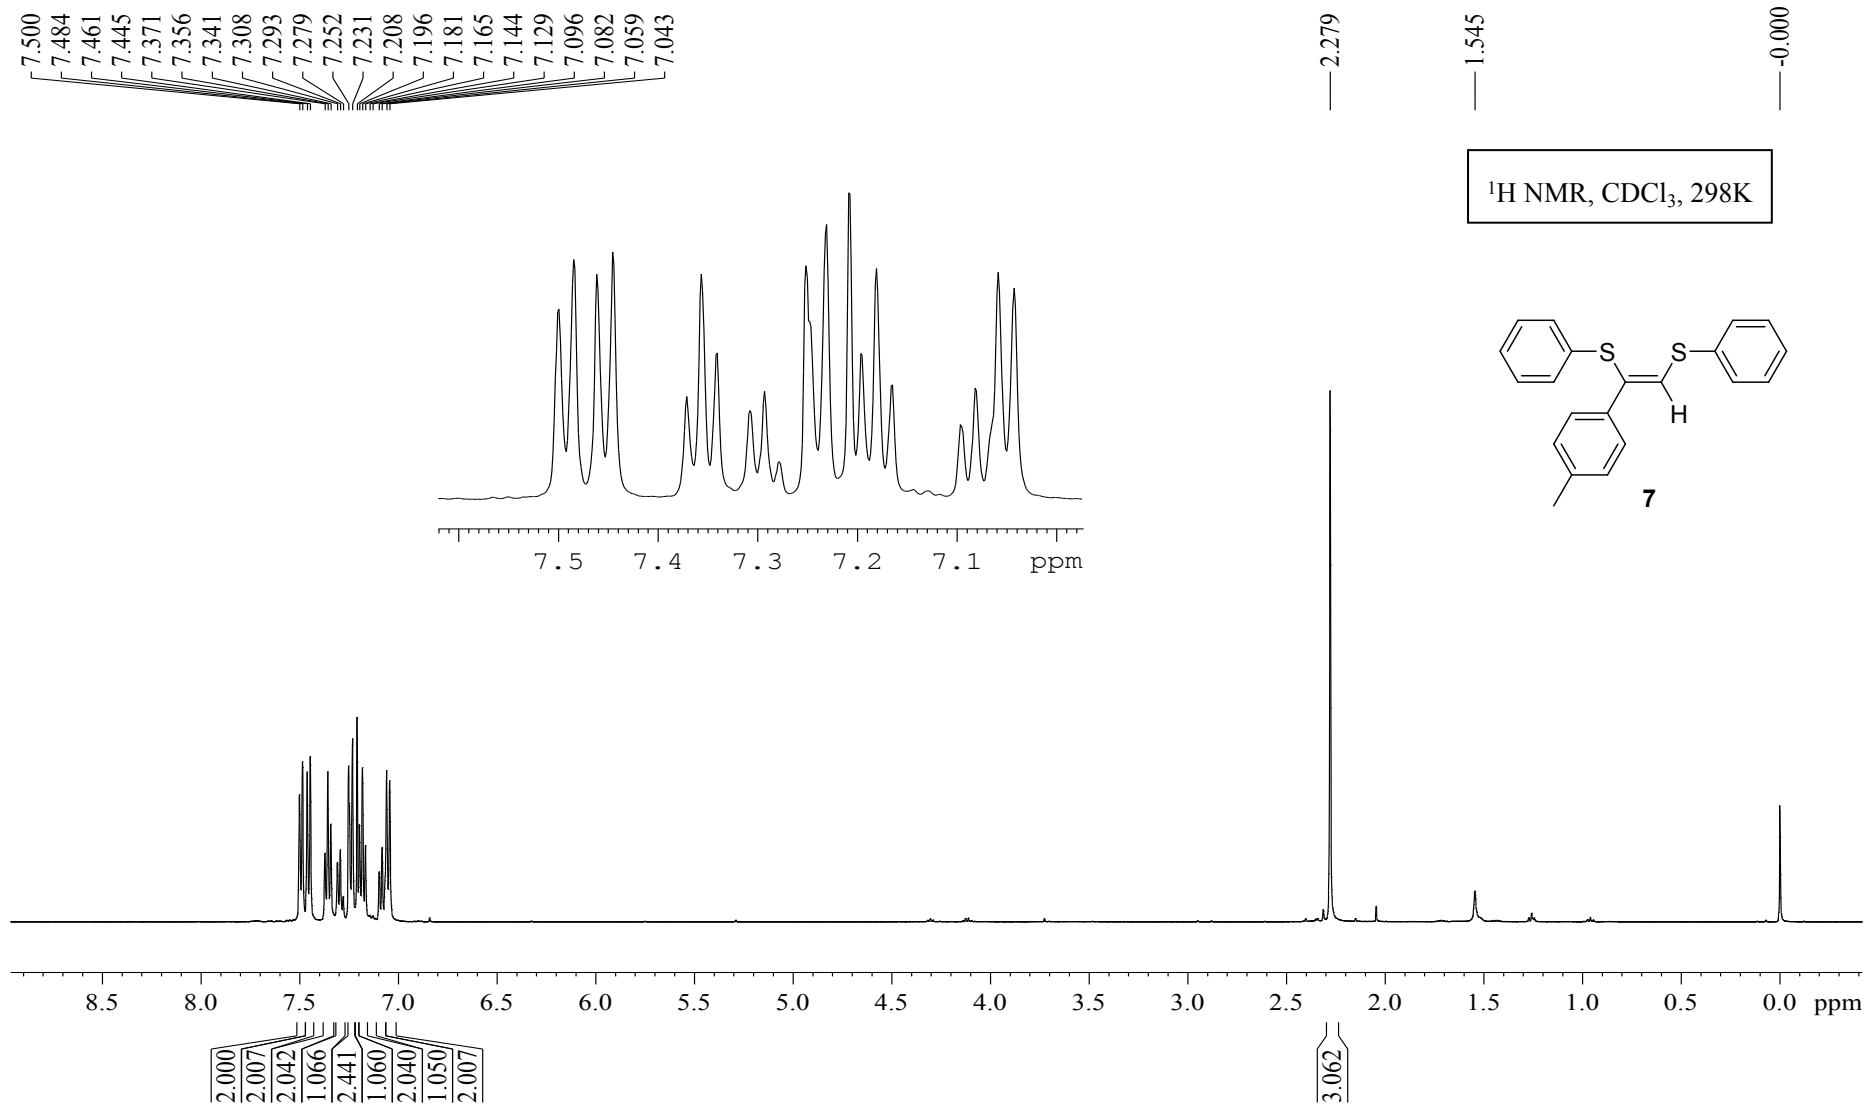

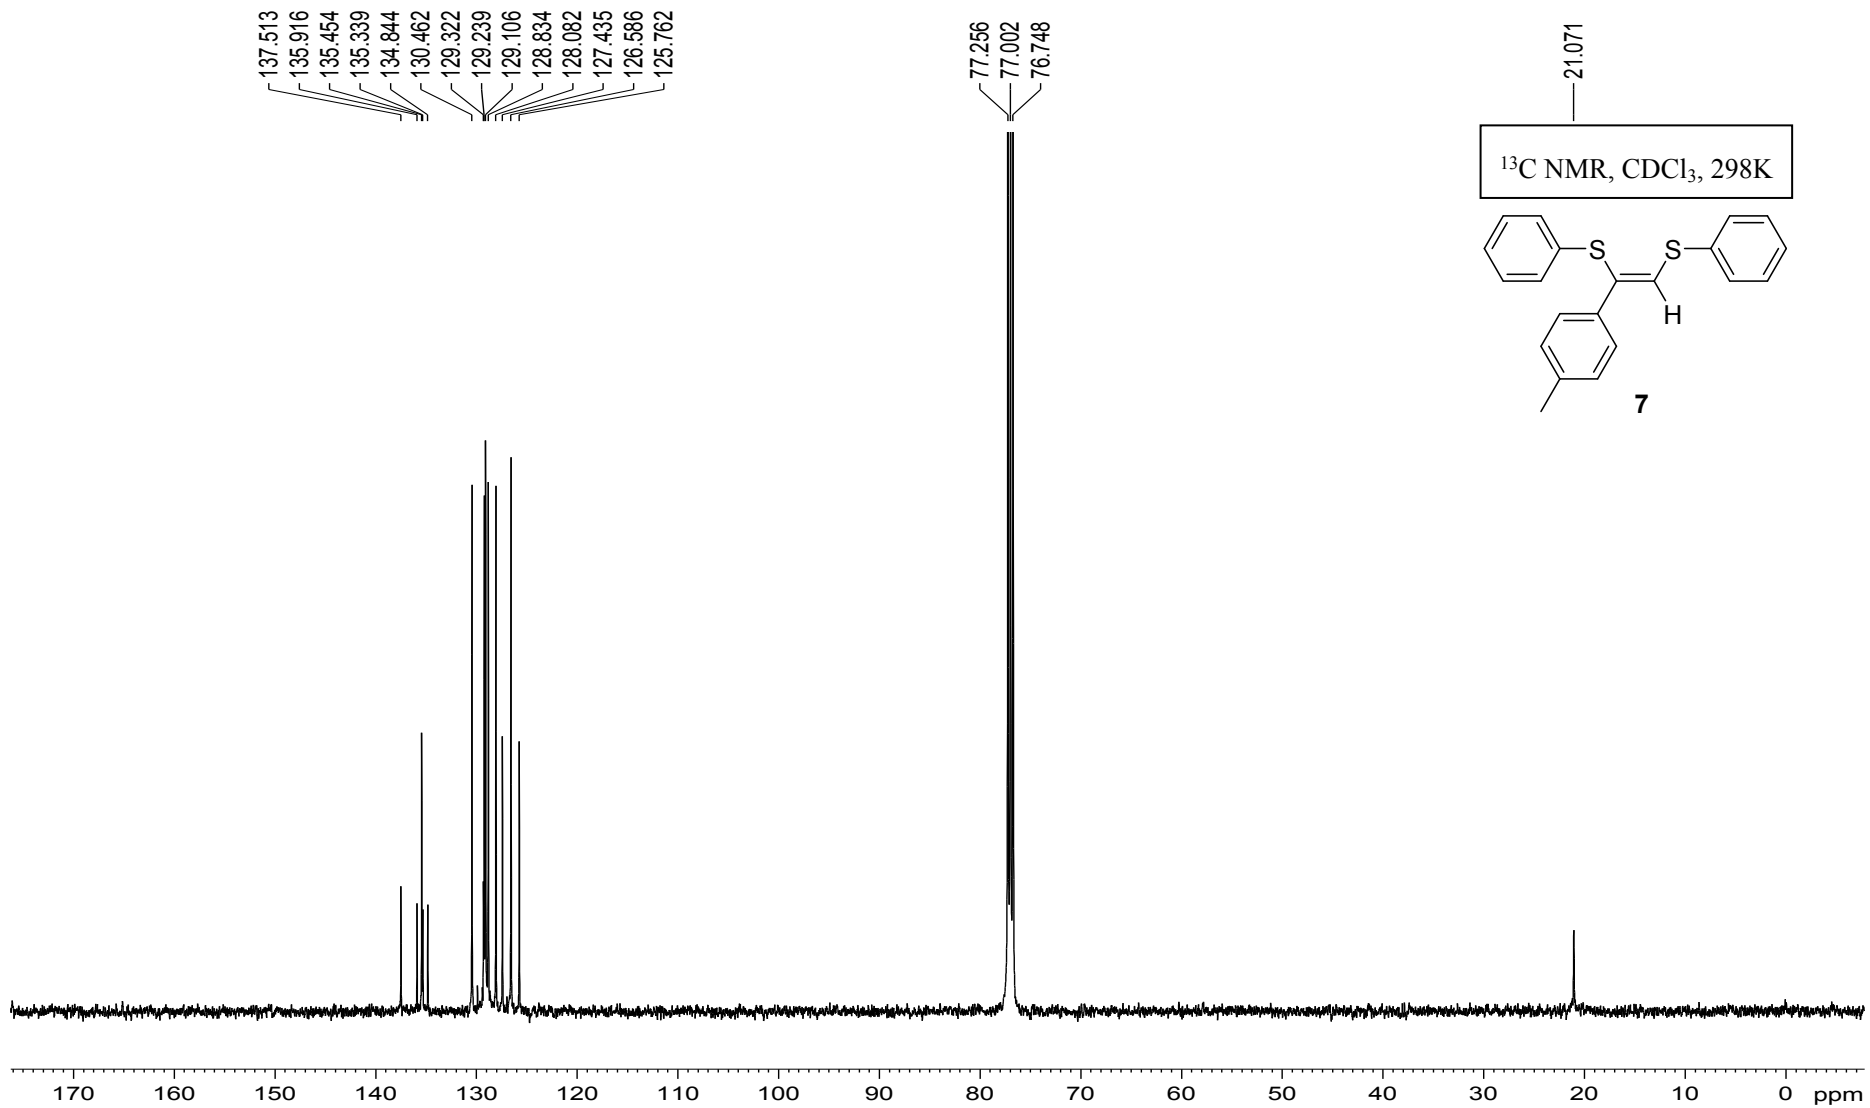

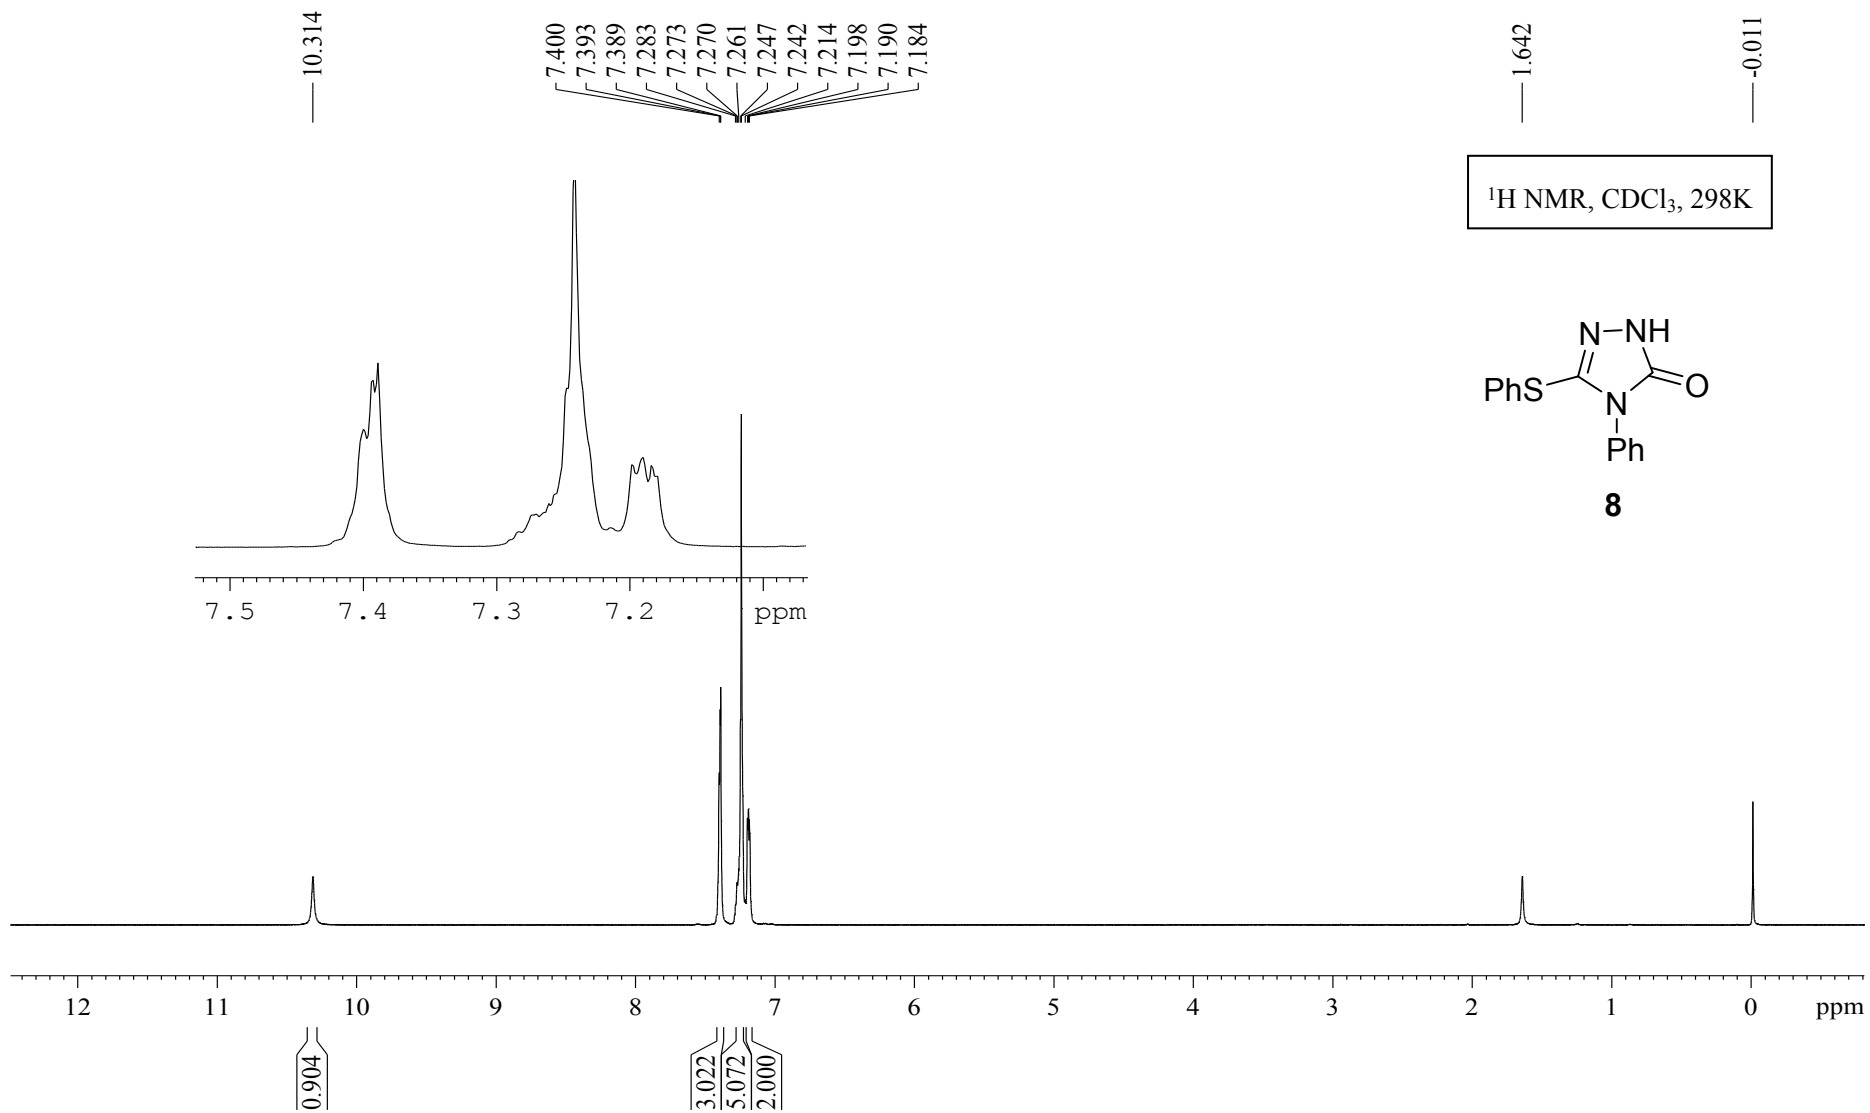



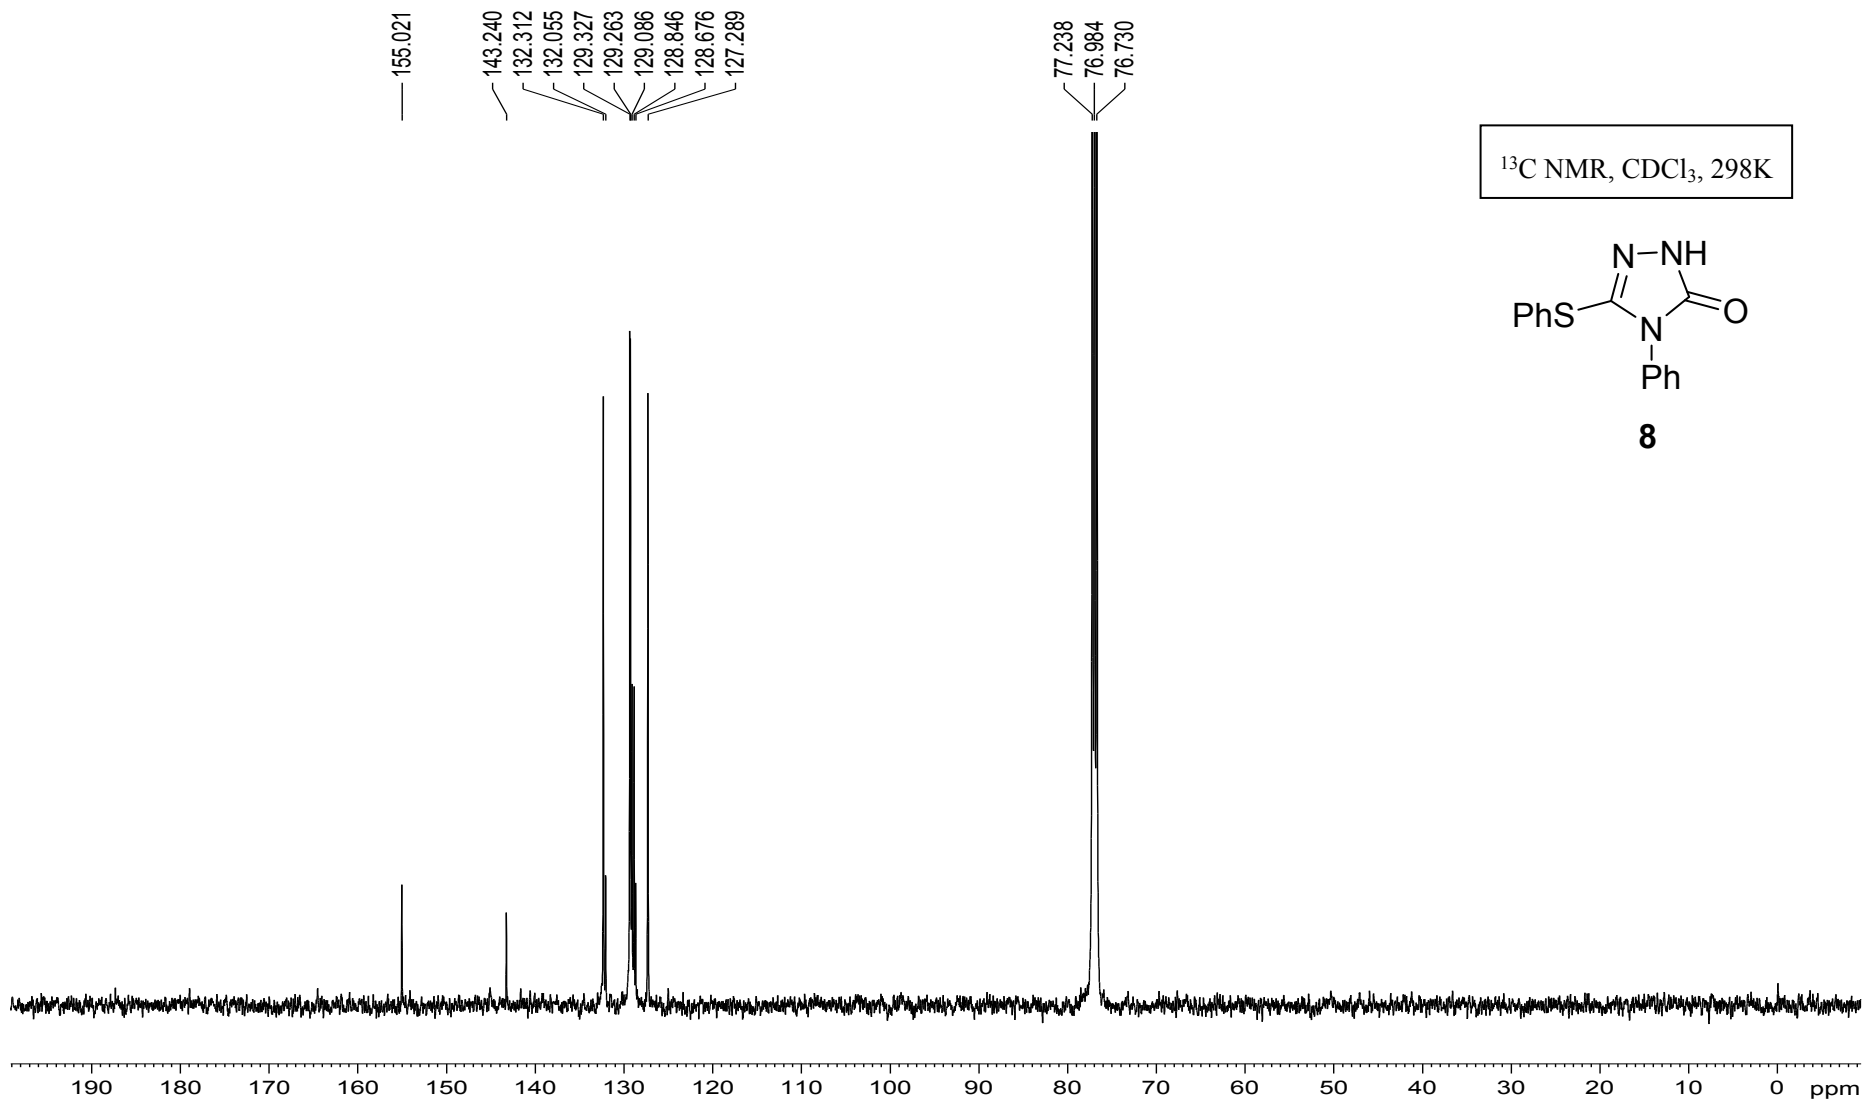

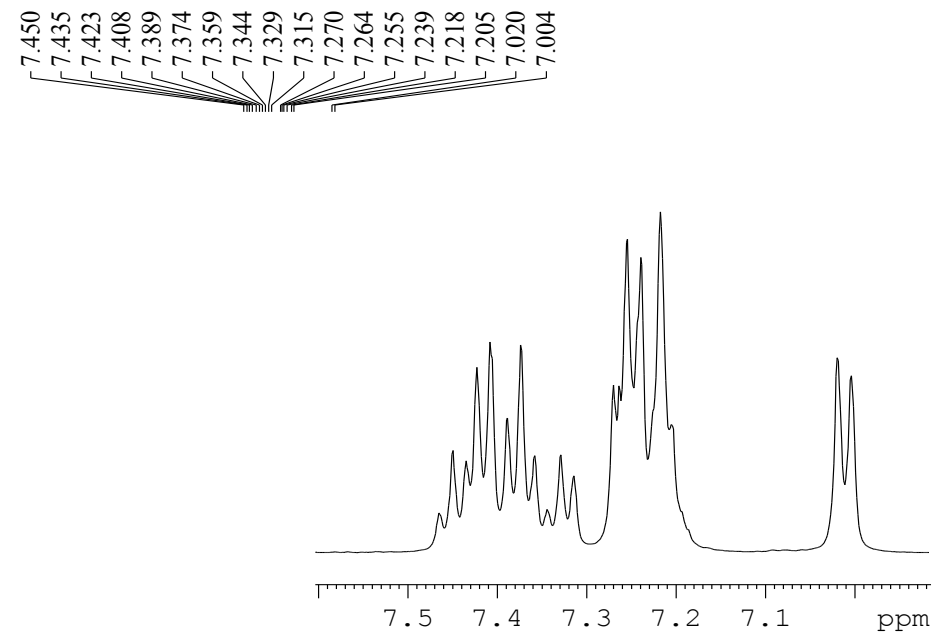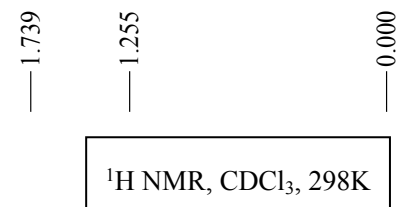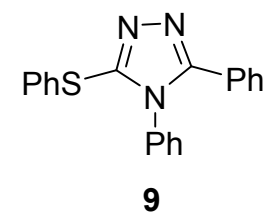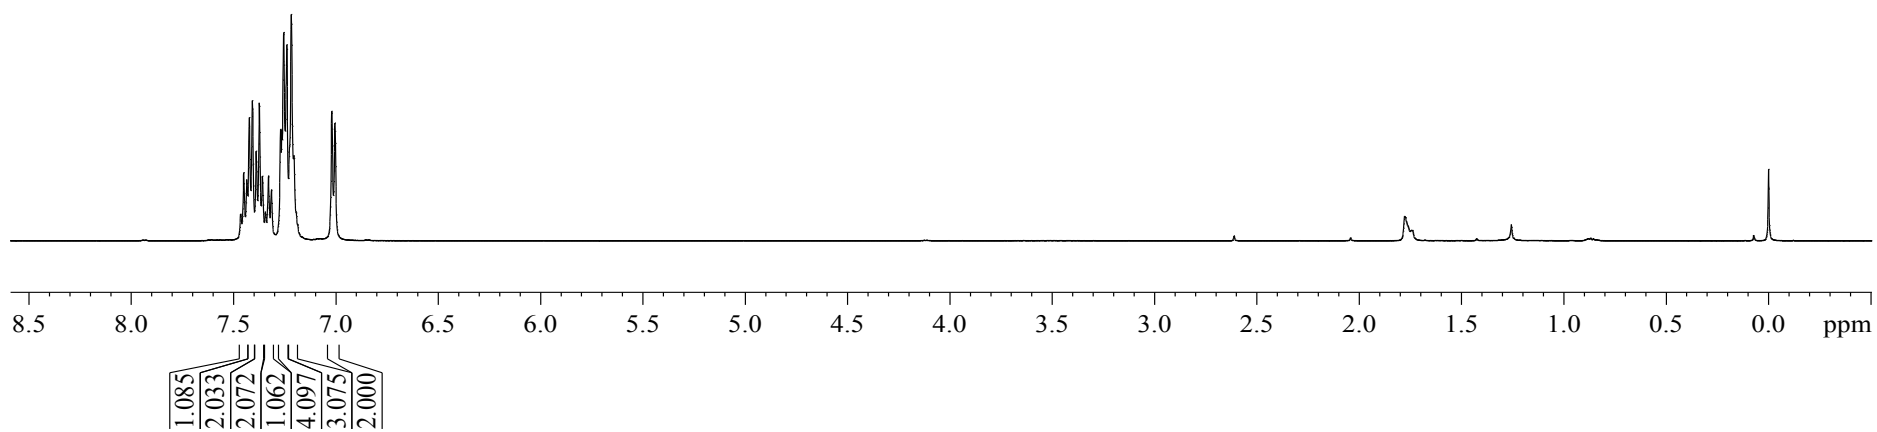

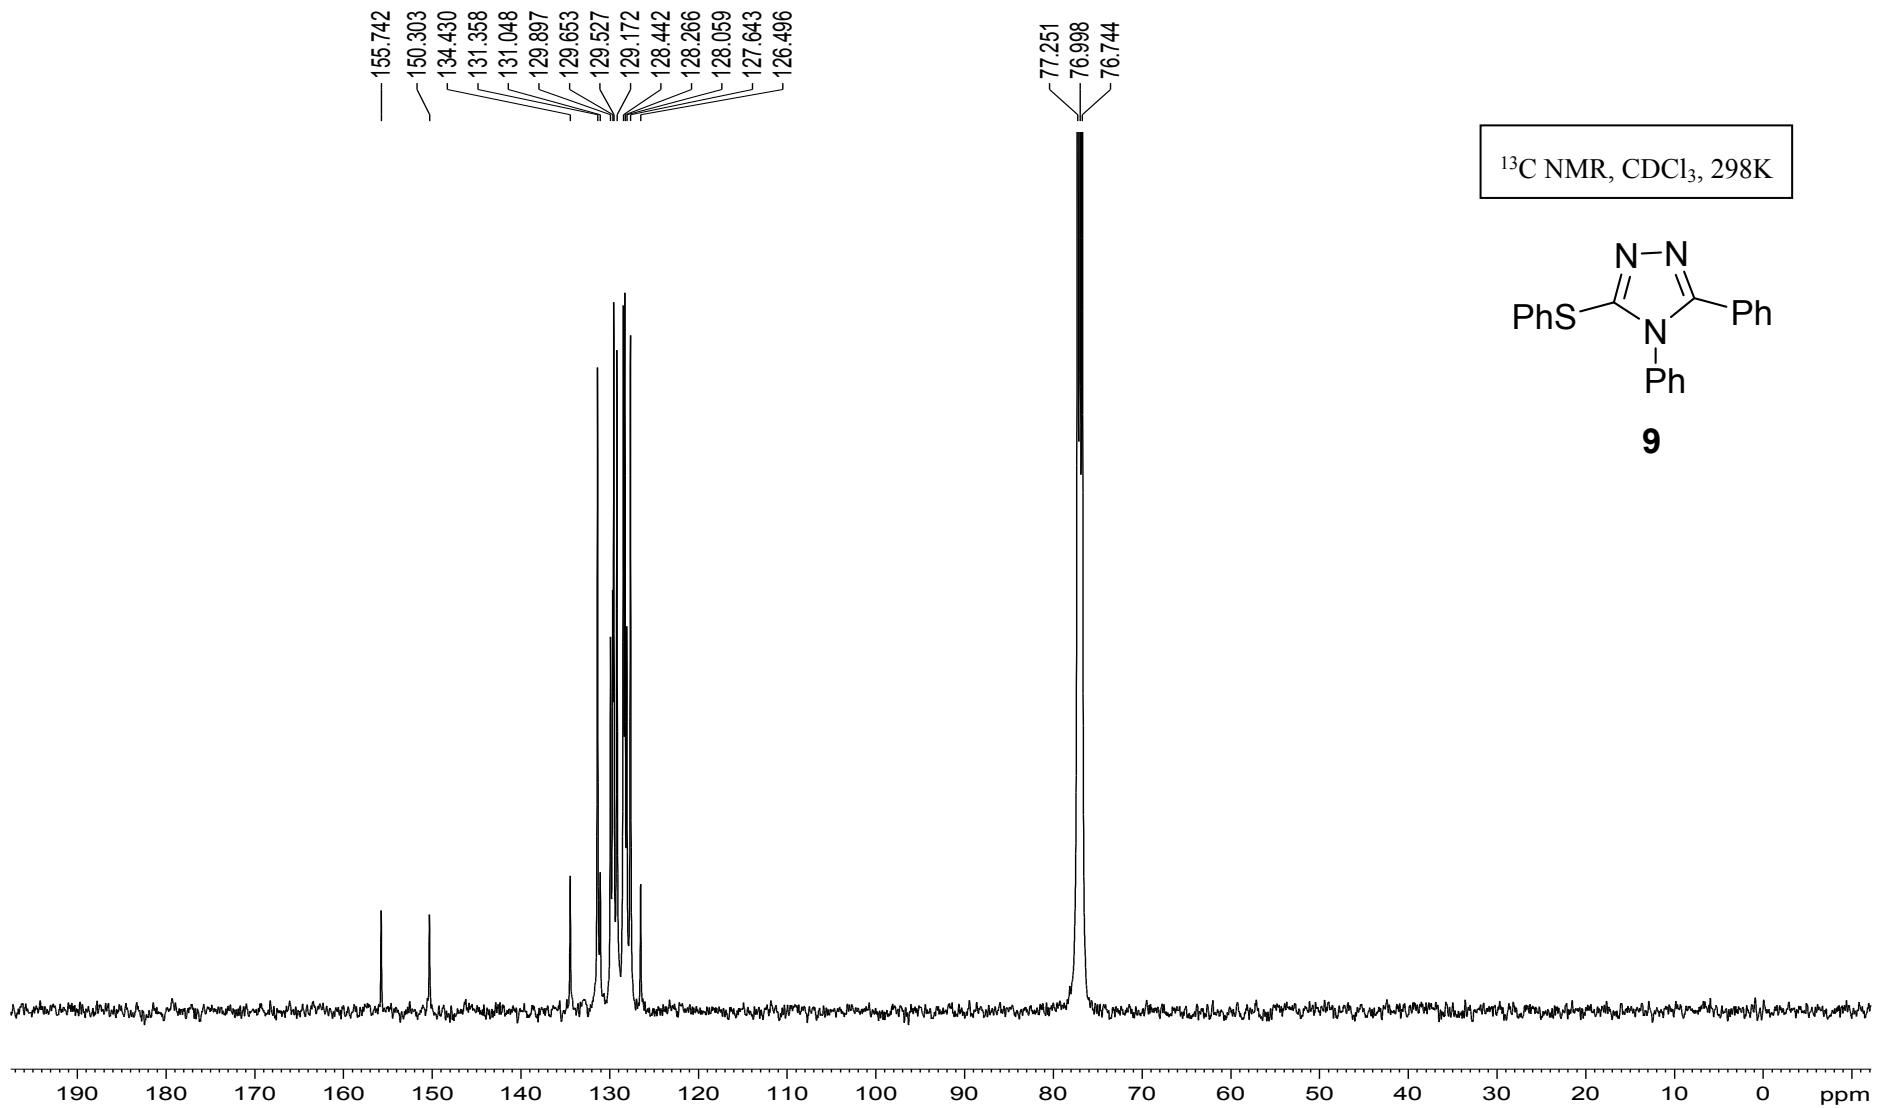

## Molecular structure and crystallographic data of 3a

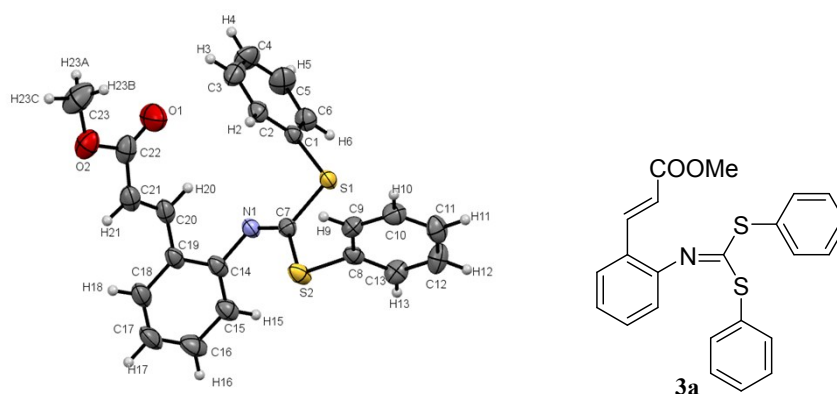

Figure S1 X-ray crystal structure of **3a**

Table S1. Crystal data and structure refinement for **3a**

|                                                  |                                                                |
|--------------------------------------------------|----------------------------------------------------------------|
| Formula                                          | C <sub>23</sub> H <sub>19</sub> NO <sub>2</sub> S <sub>2</sub> |
| CCDC number                                      | 1423393                                                        |
| Formula weight                                   | 405.51                                                         |
| Temperature (K)                                  | 173.1500 K                                                     |
| Wavelength (Å)                                   | 0.71073                                                        |
| Crystal system                                   | Orthorhombic                                                   |
| Space group                                      | P 21 21 21                                                     |
| a (Å)                                            | 8.189(2)                                                       |
| b (Å)                                            | 14.782(4)                                                      |
| c (Å)                                            | 17.421(5)                                                      |
| α (°)                                            | 90                                                             |
| β (°)                                            | 90                                                             |
| γ (°)                                            | 90                                                             |
| Volume (Å <sup>3</sup> )                         | 2108.7(10)                                                     |
| Z                                                | 4                                                              |
| Density (calculated) (Mg/m <sup>3</sup> )        | 1.277                                                          |
| Absorption coefficient (mm <sup>-1</sup> )       | 0.270                                                          |
| F(000)                                           | 848                                                            |
| Crystal size (mm <sup>3</sup> )                  | 0.27 x 0.19 x 0.1                                              |
| Theta range for data collection (°)              | 2.714 to 27.454                                                |
| Index ranges                                     | -10 ≤ h ≤ 10, -16 ≤ k ≤ 19, -22 ≤ l ≤ 19                       |
| Reflections collected                            | 15230                                                          |
| Independent reflections                          | 4800 [R(int) = 0.0464]                                         |
| Completeness to theta = 26.000° (%)              | 99.2                                                           |
| Absorption correction                            | Semi-empirical from equivalents                                |
| Max. and min. transmission                       | 1.0000 and 0.9006                                              |
| Refinement method                                | Full-matrix least-squares on F <sup>2</sup>                    |
| Data / restraints / parameters                   | 4800 / 0 / 254                                                 |
| Goodness-of-fit on F <sup>2</sup>                | 1.150                                                          |
| Final R indices [I > 2σ(I)]                      | R1 = 0.0520, wR2 = 0.0937                                      |
| R indices (all data)                             | R1 = 0.0577, wR2 = 0.0959                                      |
| Absolute structure parameter                     | 1.01(4)                                                        |
| Extinction coefficient                           | n/a                                                            |
| Largest diff. peak and hole (e.Å <sup>-3</sup> ) | 0.188 and -0.209                                               |

## Molecular structure and crystallographic data of diphenylurea

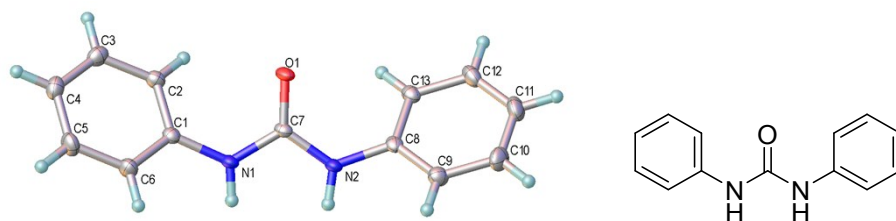

Figure S2 X-ray crystal structure of diphenylurea

Table S2. Crystal data and structure refinement for diphenylurea

|                                                  |                                                  |
|--------------------------------------------------|--------------------------------------------------|
| Formula                                          | C <sub>13</sub> H <sub>12</sub> N <sub>2</sub> O |
| CCDC number                                      | 1497705                                          |
| Formula weight                                   | 212.25                                           |
| Temperature (K)                                  | 173.1500 K                                       |
| Wavelength (Å)                                   | 0.71073                                          |
| Crystal system                                   | Orthorhombic                                     |
| Space group                                      | P n a 21                                         |
| a (Å)                                            | 9.077(4)                                         |
| b (Å)                                            | 10.400(4)                                        |
| c (Å)                                            | 11.750(5)                                        |
| α (°)                                            | 90                                               |
| β (°)                                            | 90                                               |
| γ (°)                                            | 90                                               |
| Volume (Å <sup>3</sup> )                         | 1109.3(8)                                        |
| Z                                                | 4                                                |
| Density (calculated) (Mg/m <sup>3</sup> )        | 1.277                                            |
| Absorption coefficient (mm <sup>-1</sup> )       | 0.082                                            |
| F(000)                                           | 448                                              |
| Crystal size (mm <sup>3</sup> )                  | 0.23 x 0.12 x 0.07                               |
| Theta range for data collection (°)              | 2.979 to 27.454                                  |
| Index ranges                                     | -11 ≤ h ≤ 11, -13 ≤ k ≤ 13, -12 ≤ l ≤ 15         |
| Reflections collected                            | 6686                                             |
| Independent reflections                          | 2035 [R(int) = 0.0361]                           |
| Completeness to theta = 26.000° (%)              | 99.6                                             |
| Absorption correction                            | Semi-empirical from equivalents                  |
| Max. and min. transmission                       | 1.0000 and 0.73899                               |
| Refinement method                                | Full-matrix least-squares on F <sup>2</sup>      |
| Data / restraints / parameters                   | 2035 / 1 / 145                                   |
| Goodness-of-fit on F <sup>2</sup>                | 1.013                                            |
| Final R indices [I > 2σ(I)]                      | R1 = 0.0374, wR2 = 0.1194                        |
| R indices (all data)                             | R1 = 0.0383, wR2 = 0.1208                        |
| Absolute structure parameter                     | 0.2(10)                                          |
| Extinction coefficient                           | n/a                                              |
| Largest diff. peak and hole (e.Å <sup>-3</sup> ) | 0.196 and -0.145                                 |
